# Supplementary material for: Conformational preference of a chiral terpene: vibrational circular dichroism (VCD), infrared and Raman study of S-(−)-limonene oxide
Source: Royal Society of Chemistry journal article supplement (doi:10.1039/b815541k), 2009-01-01
Supplement: b815541k.pdf [file b815541k.pdf]

# Conformational preference of a chiral terpene: Vibrational Circular Dichroism (VCD), Infrared and Raman study of S-(-)-limonene oxide.

*Juan Ramón Avilés Moreno, Francisco Partal Ureña and Juan Jesús López González\*.*

University of Jaén, Department of Physical and Analytical Chemistry. Campus Las Lagunillas, E-23071  
Jaén (Spain).

TITLE RUNNING HEAD: Chiral terpenes: S-(-)-limonene oxide.

KEYWORDS: molecular conformation, vibrational spectroscopy, chiral terpenes, S-(-)-limonene oxide, Vibrational Circular Dichroism, IR, Raman.

\*To whom correspondence should be addressed. Present address:

Dr. Juan Jesús López González.

Grupo de Química Física Teórica y Experimental FQM173, Edificio B3. Campus las Lagunillas, Facultad de Ciencias Experimentales, Universidad de Jaén, E-23071 Jaén, Spain.

Tel : +34-953 21 27 54; Fax : +34-953-21 29 40

E-mail : [jjlopez@ujaen.es](mailto:jjlopez@ujaen.es)

**Figure 1S.** Experimental IR and VCD spectra of S-(-)-limonene oxide and R-(+)-limonene oxide in the 2000  $\text{cm}^{-1}$ - 900  $\text{cm}^{-1}$  spectral region: a) IR spectra (16  $\text{cm}^{-1}$  resolution); b) raw VCD spectra and baseline obtained as the half-sum of the VCD spectra of enantiomers (neat liquid, 4000 scans, 8  $\text{cm}^{-1}$  of resolution, spacer of 15  $\mu\text{m}$ ); c) baseline corrected VCD spectra; d) comparison between corrected S-enantiomer spectra obtained as indicated above and as corrected using JASCO software (figure 6 of the manuscript).

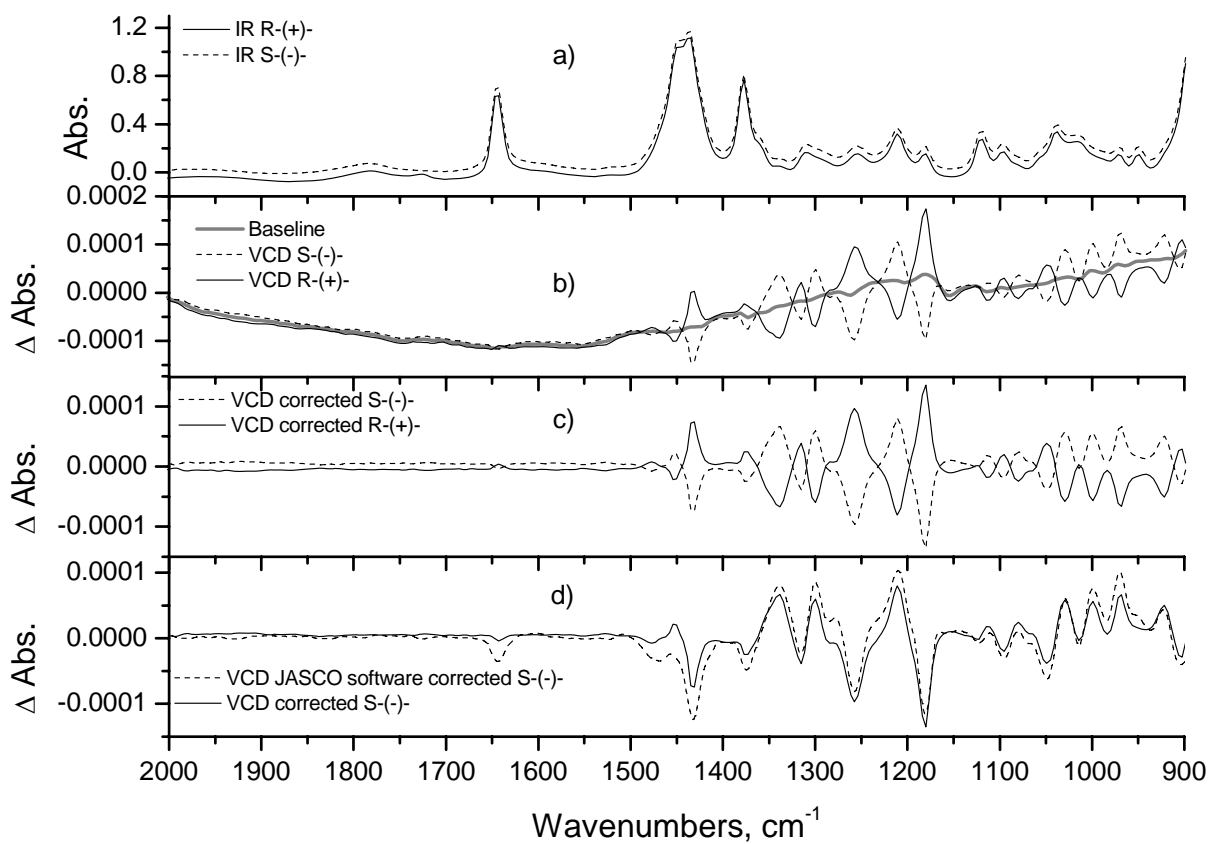

**Table 1S:** Calculated equilibrium structures of S-(-)-Limonene oxide at B3LYP/ cc-pVDZ levels for the six equatorial conformers (eq-t110, eq-t255, eq-t305, eq-c110, eq-c255, eq-c305) and the six axial conformers (ax-t115, ax-t240, ax-t345, ax-c115, ax-c240, ax-c345). Atoms are numerated in *figure 1*.

The following *Z*-matrix in internal coordinates has been used:

|   |    |     |   |     |    |     |   |
|---|----|-----|---|-----|----|-----|---|
| C |    |     |   |     |    |     |   |
| C | 1  | B1  |   |     |    |     |   |
| C | 2  | B2  | 1 | A1  |    |     |   |
| C | 3  | B3  | 2 | A2  | 1  | D1  | 0 |
| C | 4  | B4  | 3 | A3  | 2  | D2  | 0 |
| C | 1  | B5  | 2 | A4  | 3  | D3  | 0 |
| C | 4  | B6  | 3 | A5  | 2  | D4  | 0 |
| C | 7  | B7  | 4 | A6  | 3  | D5  | 0 |
| C | 7  | B8  | 4 | A7  | 8  | D6  | 1 |
| C | 1  | B9  | 2 | A8  | 3  | D7  | 0 |
| H | 8  | B10 | 7 | A9  | 9  | D8  | 0 |
| H | 8  | B11 | 7 | A10 | 9  | D9  | 0 |
| H | 9  | B12 | 7 | A11 | 8  | D10 | 0 |
| H | 9  | B13 | 7 | A12 | 8  | D11 | 0 |
| H | 9  | B14 | 7 | A13 | 8  | D12 | 0 |
| H | 2  | B15 | 1 | A14 | 10 | D13 | 0 |
| H | 3  | B16 | 2 | A15 | 1  | D14 | 0 |
| H | 3  | B17 | 2 | A16 | 1  | D15 | 0 |
| H | 4  | B18 | 3 | A17 | 2  | D16 | 0 |
| H | 5  | B19 | 4 | A18 | 3  | D17 | 0 |
| H | 5  | B20 | 4 | A19 | 3  | D18 | 0 |
| H | 6  | B21 | 1 | A20 | 2  | D19 | 0 |
| H | 6  | B22 | 1 | A21 | 2  | D20 | 0 |
| H | 10 | B23 | 1 | A22 | 2  | D21 | 0 |
| H | 10 | B24 | 1 | A23 | 2  | D22 | 0 |
| H | 10 | B25 | 1 | A24 | 2  | D23 | 0 |
| O | 1  | B26 | 2 | A25 | 3  | D24 | 0 |

Bond length: B1-B26 in Ångstroms.

Angles: A1-A25 in degrees.

Dihedral angles: D1-D24 in degrees.

Supplementary Material (ESI) for PCCP

This journal is © the Owner Societies 2009

| eq-t110           | eq-t255           | eq-t305           | eq-c110           | eq-c255           | eq-c305           |
|-------------------|-------------------|-------------------|-------------------|-------------------|-------------------|
| B1=1.48034883     | B1=1.47992193     | B1=1.48106247     | B1=1.48019509     | B1=1.47916686     | B1=1.47940431     |
| B2=1.51865992     | B2=1.51865879     | B2=1.51983127     | B2=1.51297698     | B2=1.5128455      | B2=1.5130646      |
| B3=1.54832353     | B3=1.55211972     | B3=1.53928713     | B3=1.54380425     | B3=1.54715386     | B3=1.53558429     |
| B4=1.54168167     | B4=1.53566664     | B4=1.54598218     | B4=1.54180207     | B4=1.53531143     | B4=1.54625578     |
| B5=1.51956212     | B5=1.51905493     | B5=1.5193536      | B5=1.52692181     | B5=1.52630333     | B5=1.5262467      |
| B6=1.52140467     | B6=1.52223118     | B6=1.52383988     | B6=1.52092467     | B6=1.52197988     | B6=1.52158707     |
| B7=1.34061901     | B7=1.34039897     | B7=1.3401446      | B7=1.34060204     | B7=1.34065317     | B7=1.34062203     |
| B8=1.5100375      | B8=1.51051098     | B8=1.51019309     | B8=1.51046226     | B8=1.51035205     | B8=1.5103633      |
| B9=1.51168693     | B9=1.51161776     | B9=1.51203888     | B9=1.51229782     | B9=1.51215541     | B9=1.51224245     |
| B10=1.09350766    | B10=1.09325361    | B10=1.09318557    | B10=1.09360548    | B10=1.0931805     | B10=1.0931904     |
| B11=1.09375856    | B11=1.0911859     | B11=1.09133288    | B11=1.09350856    | B11=1.09144933    | B11=1.09139138    |
| B12=1.09977277    | B12=1.09983835    | B12=1.09984849    | B12=1.09979971    | B12=1.09986006    | B12=1.0998451     |
| B13=1.10334228    | B13=1.10481564    | B13=1.10399552    | B13=1.10372987    | B13=1.10458485    | B13=1.10371696    |
| B14=1.10360597    | B14=1.10391339    | B14=1.10502326    | B14=1.10372155    | B14=1.10368127    | B14=1.10472528    |
| B15=1.09877537    | B15=1.09881611    | B15=1.09856037    | B15=1.09986123    | B15=1.09988118    | B15=1.09963237    |
| B16=1.10374114    | B16=1.10428186    | B16=1.10239437    | B16=1.1052534     | B16=1.10542616    | B16=1.10491621    |
| B17=1.10240469    | B17=1.10203387    | B17=1.1022773     | B17=1.10265045    | B17=1.10307213    | B17=1.10338875    |
| B18=1.10507298    | B18=1.10906143    | B18=1.10832188    | B18=1.10217621    | B18=1.10570312    | B18=1.10535652    |
| B19=1.10185914    | B19=1.10196571    | B19=1.1021833     | B19=1.10526582    | B19=1.10527766    | B19=1.10537164    |
| B20=1.10214237    | B20=1.1011888     | B20=1.10141695    | B20=1.10240108    | B20=1.10147336    | B20=1.10143723    |
| B21=1.10436693    | B21=1.10423978    | B21=1.10443381    | B21=1.10263554    | B21=1.10253685    | B21=1.10272599    |
| B22=1.10554565    | B22=1.10564718    | B22=1.10567165    | B22=1.10407698    | B22=1.10415851    | B22=1.10434576    |
| B23=1.10265122    | B23=1.10268166    | B23=1.10265701    | B23=1.09987695    | B23=1.099883      | B23=1.09986148    |
| B24=1.10305796    | B24=1.10305243    | B24=1.10308916    | B24=1.10333091    | B24=1.10331319    | B24=1.10333664    |
| B25=1.09977443    | B25=1.09977533    | B25=1.09976567    | B25=1.09975587    | B25=1.10272539    | B25=1.10273529    |
| B26=1.44360204    | B26=1.44316714    | B26=1.44242246    | B26=2.94123478    | B26=2.94823485    | B26=2.92471479    |
| A1=122.82572572   | A1=122.83835749   | A1=122.84334852   | A1=122.05126571   | A1=122.05507854   | A1=121.96800986   |
| A2=114.00293996   | A2=114.18564138   | A2=113.58720263   | A2=112.28645615   | A2=112.50985755   | A2=112.19149692   |
| A3=110.54138028   | A3=110.32735439   | A3=109.96279798   | A3=108.70721897   | A3=108.5773249    | A3=108.5773249    |
| A4=118.6836402    | A4=118.4829687    | A4=118.73304212   | A4=119.53488032   | A4=119.3428133    | A4=119.47242297   |
| A5=111.77942269   | A5=110.84124937   | A5=114.76639099   | A5=112.33884841   | A5=111.06937772   | A5=114.76160217   |
| A6=120.76622269   | A6=123.27745241   | A6=124.00950732   | A6=123.46487847   | A6=123.46487847   | A6=123.46487847   |
| A7=117.89948112   | A7=115.67318956   | A7=114.95200447   | A7=118.29111557   | A7=115.49677995   | A7=115.14696512   |
| A8=120.48297228   | A8=120.55777224   | A8=120.47113128   | A8=120.20600252   | A8=120.24600538   | A8=120.28367408   |
| A9=121.56902055   | A9=120.87220947   | A9=120.82017991   | A9=121.55486768   | A9=120.88738979   | A9=120.87018104   |
| A10=121.4636501   | A10=122.51126412  | A10=122.68002184  | A10=121.3994507   | A10=122.5797673   | A10=122.66399376  |
| A11=111.26693308  | A11=111.62374451  | A11=111.89437163  | A11=111.21580467  | A11=111.68645167  | A11=111.82381972  |
| A12=111.86825057  | A12=110.93742015  | A12=111.54834601  | A12=111.82567991  | A12=110.71847449  | A12=111.71323961  |
| A13=111.24900766  | A13=111.67467148  | A13=110.66829628  | A13=111.47102296  | A13=111.76314783  | A13=110.56718977  |
| A14=117.3991385   | A14=117.41606975  | A14=117.37128176  | A14=117.69318724  | A14=117.7802875   | A14=117.69783666  |
| A15=107.09854818  | A15=107.68319458  | A15=106.58901709  | A15=107.94531631  | A15=108.71394385  | A15=107.60293633  |
| A16=109.37349579  | A16=108.61050557  | A16=109.62705228  | A16=109.24060914  | A16=108.54492944  | A16=109.39951826  |
| A17=107.04648564  | A17=106.68210573  | A17=107.09410318  | A17=106.81825067  | A17=106.47630291  | A17=107.0040322   |
| A18=110.14174322  | A18=110.04637968  | A18=109.00378021  | A18=109.09523871  | A18=108.98025857  | A18=107.86581885  |
| A19=109.79622232  | A19=109.90023742  | A19=110.52966267  | A19=110.09115739  | A19=110.20979651  | A19=110.8207272   |
| A20=108.71030844  | A20=108.69372719  | A20=108.71131115  | A20=109.33721509  | A20=109.30748303  | A20=109.32169322  |
| A21=108.36008629  | A21=108.37886266  | A21=108.26348758  | A21=107.04336821  | A21=107.07546944  | A21=106.98725199  |
| A22=111.05297635  | A22=111.05794389  | A22=111.10258416  | A22=110.78009278  | A22=110.78839204  | A22=110.76296151  |
| A23=110.34310663  | A23=110.32817151  | A23=110.32818286  | A23=110.3205471   | A23=110.32303763  | A23=110.34319096  |
| A24=110.81917997  | A24=110.8366763   | A24=110.78530517  | A24=111.07135351  | A24=111.053531    | A24=111.06727352  |
| A25=59.16964409   | A25=59.1584642    | A25=59.18982093   | A25=58.46139139   | A25=58.15848383   | A25=59.10889669   |
| D1=-8.65509663    | D1=-8.13475639    | D1=-11.99285558   | D1=-22.558201     | D1=-22.1147685    | D1=-24.53265515   |
| D2=39.57055712    | D2=39.10073189    | D2=42.84663263    | D2=51.79824781    | D2=51.50583698    | D2=53.18598116    |
| D3=-0.50449067    | D3=-0.73185397    | D3=0.00568627     | D3=-2.13891025    | D3=1.84814233     | D3=2.45640088     |
| D4=166.93254405   | D4=167.9585934    | D4=169.9779197    | D4=178.19619662   | D4=179.19801498   | D4=179.07513393   |
| D5=107.87117879   | D5=-110.16180369  | D5=-27.73698608   | D5=111.83456367   | D5=-106.33664926  | D5=-21.34294647   |
| D6=121.33424266   | D6=121.04861118   | D6=121.03557555   | D6=121.17773093   | D6=121.03809898   | D6=120.99398893   |
| D7=154.63042823   | D7=154.4066071    | D7=155.06930316   | D7=-154.89321054  | D7=-155.09874605  | D7=-154.60309175  |
| D8=0.71620702     | D8=-0.34643066    | D8=0.89775575     | D8=0.50696559     | D8=-0.69649511    | D8=1.06546674     |
| D9=-179.21608108  | D9=179.96085969   | D9=-179.29796433  | D9=-179.53651456  | D9=179.24220396   | D9=-178.78656063  |
| D10=-4.53362421   | D10=-2.16485606   | D10=-4.1174207    | D10=-2.43488215   | D10=0.5809419     | D10=-3.3034372    |
| D11=-125.41738431 | D11=-122.89487993 | D11=-125.2361863  | D11=-123.05209367 | D11=-120.12336717 | D11=-124.4542769  |
| D12=115.82386183  | D12=118.54746176  | D12=116.57982382  | D12=117.90234896  | D12=121.55281237  | D12=117.34430974  |
| D13=-0.62382782   | D13=-0.7172025    | D13=-0.59223875   | D13=-1.45785506   | D13=-1.61230814   | D13=-1.47659923   |
| D14=113.83072694  | D14=113.47409082  | D14=109.86696354  | D14=99.54048503   | D14=99.19514543   | D14=97.14811926   |
| D15=-131.24539539 | D15=-131.43809556 | D15=-135.1041138  | D15=-144.86946659 | D15=-145.1951778  | D15=-147.34897021 |
| D16=-76.43032279  | D16=-76.51014061  | D16=-72.17922609  | D16=-64.352018    | D16=-64.38180814  | D16=-62.19043395  |
| D17=57.27335451   | D17=57.43552799   | D17=56.72994688   | D17=57.29848396   | D17=57.2532455    | D17=58.07584242   |
| D18=175.41983228  | D18=175.52693972  | D18=174.14713145  | D18=173.88692926  | D18=173.80498728  | D18=173.97812163  |
| D19=-144.796786   | D19=-144.77407763 | D19=-142.94362719 | D19=-135.18527964 | D19=-135.13488388 | D19=-133.63898965 |
| D20=99.85728179   | D20=99.9129282    | D20=101.76730549  | D20=109.93624771  | D20=110.01927559  | D20=111.56256001  |
| D21=-94.62652602  | D21=-94.55246974  | D21=-94.39272951  | D21=-27.36662587  | D21=-27.40356498  | D21=-27.50894734  |
| D22=145.94716302  | D22=146.04090965  | D22=146.14621702  | D22=-146.92507944 | D22=-146.97420404 | D22=-147.06404503 |
| D23=26.3292922    | D23=26.42770329   | D23=26.58515583   | D23=-93.68077596  | D23=-93.6380636   | D23=-93.52150029  |
| D24=-103.01726997 | D24=-103.21715649 | D24=-102.63407098 | D24=-21.90696328  | D24=-22.13021244  | D24=-21.12812586  |

Supplementary Material (ESI) for *PCCP*  
 This journal is © the Owner Societies 2009

| ax-t115                                                                                                                                                                                                                                                                                                                                                                                                                                                                                                                                                                                                                                                                                                                                                                                                                                                                                                                                                                                                                                                                                                                                                                                                                                                                                                                                                                                                                                           | ax-t240                                                                                                                                                                                                                                                                                                                                                                                                                                                                                                                                                                                                                                                                                                                                                                                                                                                                                                                                                                                                                                                                                                                                                                                                                                                                                                                                                                                                                                           | ax-t345                                                                                                                                                                                                                                                                                                                                                                                                                                                                                                                                                                                                                                                                                                                                                                                                                                                                                                                                                                                                                                                                                                                                                                                                                                                                                                                                                                                                                                             | ax-c115                                                                                                                                                                                                                                                                                                                                                                                                                                                                                                                                                                                                                                                                                                                                                                                                                                                                                                                                                                                                                                                                                                                                                                                                                                                                                                                                                                                                                                          | ax-c240                                                                                                                                                                                                                                                                                                                                                                                                                                                                                                                                                                                                                                                                                                                                                                                                                                                                                                                                                                                                                                                                                                                                                                                                                                                                                                                                                                                                                                          | ax-c345                                                                                                                                                                                                                                                                                                                                                                                                                                                                                                                                                                                                                                                                                                                                                                                                                                                                                                                                                                                                                                                                                                                                                                                                                                                                                                                                                                                                                                          |
|---------------------------------------------------------------------------------------------------------------------------------------------------------------------------------------------------------------------------------------------------------------------------------------------------------------------------------------------------------------------------------------------------------------------------------------------------------------------------------------------------------------------------------------------------------------------------------------------------------------------------------------------------------------------------------------------------------------------------------------------------------------------------------------------------------------------------------------------------------------------------------------------------------------------------------------------------------------------------------------------------------------------------------------------------------------------------------------------------------------------------------------------------------------------------------------------------------------------------------------------------------------------------------------------------------------------------------------------------------------------------------------------------------------------------------------------------|---------------------------------------------------------------------------------------------------------------------------------------------------------------------------------------------------------------------------------------------------------------------------------------------------------------------------------------------------------------------------------------------------------------------------------------------------------------------------------------------------------------------------------------------------------------------------------------------------------------------------------------------------------------------------------------------------------------------------------------------------------------------------------------------------------------------------------------------------------------------------------------------------------------------------------------------------------------------------------------------------------------------------------------------------------------------------------------------------------------------------------------------------------------------------------------------------------------------------------------------------------------------------------------------------------------------------------------------------------------------------------------------------------------------------------------------------|-----------------------------------------------------------------------------------------------------------------------------------------------------------------------------------------------------------------------------------------------------------------------------------------------------------------------------------------------------------------------------------------------------------------------------------------------------------------------------------------------------------------------------------------------------------------------------------------------------------------------------------------------------------------------------------------------------------------------------------------------------------------------------------------------------------------------------------------------------------------------------------------------------------------------------------------------------------------------------------------------------------------------------------------------------------------------------------------------------------------------------------------------------------------------------------------------------------------------------------------------------------------------------------------------------------------------------------------------------------------------------------------------------------------------------------------------------|--------------------------------------------------------------------------------------------------------------------------------------------------------------------------------------------------------------------------------------------------------------------------------------------------------------------------------------------------------------------------------------------------------------------------------------------------------------------------------------------------------------------------------------------------------------------------------------------------------------------------------------------------------------------------------------------------------------------------------------------------------------------------------------------------------------------------------------------------------------------------------------------------------------------------------------------------------------------------------------------------------------------------------------------------------------------------------------------------------------------------------------------------------------------------------------------------------------------------------------------------------------------------------------------------------------------------------------------------------------------------------------------------------------------------------------------------|--------------------------------------------------------------------------------------------------------------------------------------------------------------------------------------------------------------------------------------------------------------------------------------------------------------------------------------------------------------------------------------------------------------------------------------------------------------------------------------------------------------------------------------------------------------------------------------------------------------------------------------------------------------------------------------------------------------------------------------------------------------------------------------------------------------------------------------------------------------------------------------------------------------------------------------------------------------------------------------------------------------------------------------------------------------------------------------------------------------------------------------------------------------------------------------------------------------------------------------------------------------------------------------------------------------------------------------------------------------------------------------------------------------------------------------------------|--------------------------------------------------------------------------------------------------------------------------------------------------------------------------------------------------------------------------------------------------------------------------------------------------------------------------------------------------------------------------------------------------------------------------------------------------------------------------------------------------------------------------------------------------------------------------------------------------------------------------------------------------------------------------------------------------------------------------------------------------------------------------------------------------------------------------------------------------------------------------------------------------------------------------------------------------------------------------------------------------------------------------------------------------------------------------------------------------------------------------------------------------------------------------------------------------------------------------------------------------------------------------------------------------------------------------------------------------------------------------------------------------------------------------------------------------|
| B1=1.47983377<br>B2=1.51210611<br>B3=1.55788418<br>B4=1.54677112<br>B5=1.52612662<br>B6=1.52909057<br>B7=1.34215096<br>B8=1.50900723<br>B9=1.5119552<br>B10=1.09359657<br>B11=1.09392548<br>B12=1.1001811<br>B13=1.09954677<br>B14=1.10470424<br>B15=1.09996604<br>B16=1.10314805<br>B17=1.10543609<br>B18=1.1015392<br>B19=1.10248138<br>B20=1.10536754<br>B21=1.10117987<br>B22=1.10266809<br>B23=1.0998918<br>B24=1.10273786<br>B25=1.1032977<br>B26=1.4370975<br>A1=122.83833113<br>A2=116.80238147<br>A3=110.15367795<br>A4=119.13734251<br>A5=114.43569302<br>A6=118.84396163<br>A7=120.58875185<br>A8=120.31226484<br>A9=121.40940893<br>A10=121.75469856<br>A11=110.9169043<br>A12=111.50084693<br>A13=110.81276574<br>A14=117.41239129<br>A15=109.28010977<br>A16=106.16989528<br>A17=105.08816504<br>A18=109.62663344<br>A19=106.66664827<br>A20=107.61126823<br>A21=108.91978561<br>A22=110.82528097<br>A23=110.98505377<br>A24=110.31993471<br>A25=59.65464126<br>D1=13.83908921<br>D2=36.33049015<br>D3=3.70080391<br>D4=96.61953667<br>D5=102.50623581<br>D6=120.56673882<br>D7=153.04726235<br>D8=1.09620009<br>D9=179.05183284<br>D10=7.99457684<br>D11=130.57159713<br>D12=111.20707712<br>D13=1.1487108<br>D14=139.49724466<br>D15=106.64335459<br>D16=149.6134122<br>D17=177.85403544<br>D18=67.82757996<br>D19=106.47949915<br>D20=138.97927453<br>D21=27.01559465<br>D22=94.00273742<br>D23=146.66561951<br>D24=100.99347048 | B1=1.47940695<br>B2=1.51196487<br>B3=1.54790825<br>B4=1.54131094<br>B5=1.52639445<br>B6=1.53455839<br>B7=1.34090479<br>B8=1.5087684<br>B9=1.51216777<br>B10=1.09295824<br>B11=1.09144145<br>B12=1.09973509<br>B13=1.10459047<br>B14=1.1021141<br>B15=1.10012753<br>B16=1.1010921<br>B17=1.10508686<br>B18=1.10689464<br>B19=1.10049657<br>B20=1.10482971<br>B21=1.10222696<br>B22=1.10268961<br>B23=1.09993954<br>B24=1.10276711<br>B25=1.10329339<br>B26=1.43678777<br>A1=121.76321759<br>A2=113.65335903<br>A3=107.74300472<br>A4=119.47126121<br>A5=115.57526131<br>A6=122.33786245<br>A7=117.50749326<br>A8=120.13600013<br>A9=120.69871084<br>A10=122.95032187<br>A11=110.99841216<br>A12=111.79490132<br>A13=110.4742687<br>A14=117.73622148<br>A15=109.40907734<br>A16=107.58118426<br>A17=105.53983442<br>A18=111.16710836<br>A19=107.47074894<br>A20=107.29338112<br>A21=108.91978561<br>A22=110.79012827<br>A23=111.050437<br>A24=110.30047623<br>A25=59.69494837<br>D1=21.88492923<br>D2=50.47870372<br>D3=1.91032255<br>D4=79.17021481<br>D5=154.64263598<br>D6=120.04861808<br>D7=154.81236909<br>D8=0.09239126<br>D9=179.98459394<br>D10=5.50333168<br>D11=126.1009836<br>D12=114.43374857<br>D13=2.0415138<br>D14=147.39416113<br>D15=98.09331895<br>D16=165.05362588<br>D17=172.52166167<br>D18=57.23388175<br>D19=109.93146174<br>D20=134.83317065<br>D21=27.45320459<br>D22=93.60283693<br>D23=147.02730618<br>D24=100.97303543 | B1=1.4807387<br>B2=1.51506624<br>B3=1.55067245<br>B4=1.54848721<br>B5=1.52804762<br>B6=1.52784715<br>B7=1.34020515<br>B8=1.51143413<br>B9=1.51169046<br>B10=1.09399865<br>B11=1.09001999<br>B12=1.09992538<br>B13=1.10447816<br>B14=1.10523733<br>B15=1.09981799<br>B16=1.10280812<br>B17=1.10514062<br>B18=1.10464079<br>B19=1.10207791<br>B20=1.10567693<br>B21=1.10209357<br>B22=1.10233374<br>B23=1.09995482<br>B24=1.10283165<br>B25=1.10328518<br>B26=1.43708338<br>A1=122.5337778<br>A2=116.61006407<br>A3=109.59630869<br>A4=118.38778066<br>A5=116.83033854<br>A6=124.46659762<br>A7=114.33648332<br>A8=120.39546026<br>A9=120.42487192<br>A10=121.92206387<br>A11=111.74598815<br>A12=111.61128989<br>A13=110.96672386<br>A14=117.62269071<br>A15=109.40392894<br>A16=105.90060225<br>A17=105.78356497<br>A18=110.25262379<br>A19=108.04929583<br>A20=108.04515969<br>A21=109.41805119<br>A22=110.88434272<br>A23=110.96091761<br>A24=110.28787173<br>A25=59.57285505<br>D1=10.19467238<br>D2=36.26624779<br>D3=3.31612776<br>D4=93.10989321<br>D5=29.17066979<br>D6=121.19598467<br>D7=152.53462691<br>D8=0.07525961<br>D9=178.17515928<br>D10=3.51100093<br>D11=124.3805191<br>D12=117.31374124<br>D13=0.89056996<br>D14=136.33988202<br>D15=109.70698868<br>D16=150.23013504<br>D17=178.03531853<br>D18=62.36015098<br>D19=98.29631968<br>D20=145.73485999<br>D21=26.52021414<br>D22=94.5101541<br>D23=146.2110898<br>D24=101.05185713 | B1=1.4826227<br>B2=1.52089352<br>B3=1.54778154<br>B4=1.54897117<br>B5=1.51975647<br>B6=1.53093756<br>B7=1.34134955<br>B8=1.51186366<br>B9=1.51217053<br>B10=1.09342724<br>B11=1.09394395<br>B12=1.10003229<br>B13=1.10350893<br>B14=1.10162214<br>B15=1.09886174<br>B16=1.10193997<br>B17=1.10316439<br>B18=1.10755047<br>B19=1.10110191<br>B20=1.10285722<br>B21=1.1034316<br>B22=1.10469209<br>B23=1.09981626<br>B24=1.10309913<br>B25=1.10267034<br>B26=1.44318015<br>A1=123.09737968<br>A2=114.75645894<br>A3=109.8046758<br>A4=118.99326209<br>A5=113.9998591<br>A6=119.61790249<br>A7=120.05613436<br>A8=120.34917323<br>A9=121.60437957<br>A10=121.52930766<br>A11=110.87369043<br>A12=111.49175004<br>A13=112.44136921<br>A14=117.22344815<br>A15=109.66499167<br>A16=106.6293955<br>A17=107.17453263<br>A18=109.45323075<br>A19=107.82376539<br>A20=108.82048824<br>A21=108.39438857<br>A22=110.79058392<br>A23=110.28203053<br>A24=111.20939137<br>A25=59.05454779<br>D1=11.25089587<br>D2=39.18104682<br>D3=0.44843241<br>D4=89.28679541<br>D5=141.59032728<br>D6=120.3209294<br>D7=155.79491224<br>D8=1.79535583<br>D9=178.8532667<br>D10=0.03283424<br>D11=119.8420856<br>D12=120.9219204<br>D13=0.37535944<br>D14=136.18672267<br>D15=109.3435148<br>D16=154.12896797<br>D17=176.67311415<br>D18=60.25209013<br>D19=104.14377557<br>D20=141.03408373<br>D21=26.81263441<br>D22=146.35522353<br>D23=94.22983841<br>D24=102.17282289 | B1=1.48004525<br>B2=1.51984616<br>B3=1.55255727<br>B4=1.54067078<br>B5=1.51778459<br>B6=1.53131282<br>B7=1.34131898<br>B8=1.51289631<br>B9=1.512105<br>B10=1.0932907<br>B11=1.09042538<br>B12=1.09966393<br>B13=1.10443165<br>B14=1.10346273<br>B15=1.09873287<br>B16=1.09947027<br>B17=1.10305789<br>B18=1.10750547<br>B19=1.10114541<br>B20=1.10196435<br>B21=1.10166956<br>B22=1.10469112<br>B23=1.09985388<br>B24=1.1031595<br>B25=1.10251155<br>B26=1.44409599<br>A1=122.8241273<br>A2=114.71205784<br>A3=109.0279630<br>A4=118.87525006<br>A5=114.33154257<br>A6=123.75929305<br>A7=116.4240494<br>A8=120.36264914<br>A9=120.70402113<br>A10=123.00046985<br>A11=111.08684967<br>A12=111.32650325<br>A13=112.05237143<br>A14=117.38289692<br>A15=109.30926091<br>A16=106.65373089<br>A17=105.6962269<br>A18=110.63737112<br>A19=107.71623005<br>A20=107.83132417<br>A21=108.48238814<br>A22=110.7579453<br>A23=110.33907657<br>A24=111.0543206<br>A25=59.11826876<br>D1=13.12118372<br>D2=41.57370875<br>D3=0.69863608<br>D4=89.47522959<br>D5=139.57493032<br>D6=119.63105746<br>D7=155.49898313<br>D8=0.29041677<br>D9=178.85326677<br>D10=9.02980357<br>D11=129.57099117<br>D12=111.23530042<br>D13=0.54761206<br>D14=138.53398504<br>D15=107.24079427<br>D16=156.52952520<br>D17=174.58482091<br>D18=58.59011441<br>D19=104.58770086<br>D20=140.38436301<br>D21=27.42665209<br>D22=146.96853349<br>D23=93.56108704<br>D24=102.28650308 | B1=1.48044285<br>B2=1.52074848<br>B3=1.54329731<br>B4=1.55073935<br>B5=1.51950227<br>B6=1.52587834<br>B7=1.34092913<br>B8=1.5107602<br>B9=1.51159114<br>B10=1.09329473<br>B11=1.09161177<br>B12=1.0997808<br>B13=1.10365187<br>B14=1.10462488<br>B15=1.09889405<br>B16=1.10117648<br>B17=1.10323649<br>B18=1.10524333<br>B19=1.10107787<br>B20=1.10182942<br>B21=1.10358353<br>B22=1.10447875<br>B23=1.09987429<br>B24=1.10313715<br>B25=1.10252847<br>B26=1.4437967<br>A1=122.76302451<br>A2=114.69457591<br>A3=109.30438478<br>A4=118.72413758<br>A5=115.03007311<br>A6=124.04756094<br>A7=115.23079375<br>A8=120.45330812<br>A9=120.94684718<br>A10=122.60171073<br>A11=111.66755321<br>A12=111.70760612<br>A13=110.82897245<br>A14=117.3968637<br>A15=109.64915754<br>A16=106.74943324<br>A17=107.32765243<br>A18=110.69870443<br>A19=108.2522776<br>A20=108.25700134<br>A21=108.67205066<br>A22=110.8025748<br>A23=110.36520658<br>A24=110.98603147<br>A25=59.15451122<br>D1=10.70548228<br>D2=40.45625198<br>D3=0.08420315<br>D4=86.21413923<br>D5=16.83231456<br>D6=120.72085169<br>D7=154.95519062<br>D8=0.2915289<br>D9=179.79175009<br>D10=0.8106342<br>D11=120.05712736<br>D12=121.54075058<br>D13=0.64696875<br>D14=135.23551532<br>D15=109.85671207<br>D16=156.04191611<br>D17=174.19394281<br>D18=57.34821222<br>D19=101.40033445<br>D20=143.06229420<br>D21=27.02404348<br>D22=146.62077888<br>D23=93.94153541<br>D24=102.3557283 |

**Table 2S:** Theoretical (B3LYP/ cc-pVDZ) vibrational wavenumbers, infrared intensities, Raman activities, dipole strengths and rotatory strengths for the five most stable equatorial conformers (eq-t110, eq-t255, eq-c110, eq-c255 and eq-c305) of the S(-)-Limonene oxide.

S(-)-Limonene Oxide, eq-t110 (0.0 kJ/mol)

Harmonic frequencies (cm<sup>-1</sup>), IR intensities (KM/Mole), Raman scattering activities (A<sup>4</sup>/AMU), depolarization ratios for plane and unpolarized incident light, reduced masses (AMU), force constants (mDyne/A), Dipole strengths (10<sup>-40</sup> esu<sup>2</sup>-cm<sup>2</sup>), Rotational strengths (10<sup>-44</sup> esu<sup>2</sup>-cm<sup>2</sup>), and normal coordinates:

|                | 75       | 74       | 73       |
|----------------|----------|----------|----------|
|                | A        | A        | A        |
| Frequencies -- | 54.3744  | 65.4390  | 165.8162 |
| Red. masses -- | 2.6383   | 3.2395   | 2.4730   |
| Frc consts --  | 0.0046   | 0.0082   | 0.0401   |
| IR Inten --    | 0.5811   | 0.9157   | 0.2689   |
| Raman Activ -- | 5.0382   | 0.8132   | 1.0925   |
| Depolar (P) -- | 0.7492   | 0.7422   | 0.7365   |
| Depolar (U) -- | 0.8566   | 0.8520   | 0.8482   |
| Dip. str. --   | 42.6372  | 55.8263  | 6.4699   |
| Rot. str. --   | -2.2953  | 1.8552   | 0.4776   |
|                | 72       | 71       | 70       |
|                | A        | A        | A        |
| Frequencies -- | 178.2733 | 187.7392 | 209.0620 |
| Red. masses -- | 1.2561   | 1.1285   | 2.2788   |
| Frc consts --  | 0.0235   | 0.0234   | 0.0587   |
| IR Inten --    | 0.1582   | 0.3627   | 0.8156   |
| Raman Activ -- | 0.6160   | 0.2180   | 0.4918   |
| Depolar (P) -- | 0.7145   | 0.7007   | 0.6630   |
| Depolar (U) -- | 0.8335   | 0.8240   | 0.7973   |
| Dip. str. --   | 3.5397   | 7.7074   | 15.5645  |
| Rot. str. --   | 2.7371   | 1.5352   | 1.9889   |
|                | 69       | 68       | 67       |
|                | A        | A        | A        |
| Frequencies -- | 234.2876 | 282.5798 | 318.1149 |
| Red. masses -- | 2.0940   | 3.3990   | 2.2314   |
| Frc consts --  | 0.0677   | 0.1599   | 0.1330   |
| IR Inten --    | 0.9219   | 0.8213   | 1.2690   |
| Raman Activ -- | 0.3294   | 2.1144   | 1.7673   |
| Depolar (P) -- | 0.2465   | 0.3068   | 0.6582   |
| Depolar (U) -- | 0.3955   | 0.4696   | 0.7938   |
| Dip. str. --   | 15.6979  | 11.5944  | 15.9147  |
| Rot. str. --   | -3.5104  | -0.8807  | 1.9369   |
|                | 66       | 65       | 64       |
|                | A        | A        | A        |
| Frequencies -- | 318.5961 | 389.3903 | 442.1619 |
| Red. masses -- | 2.5866   | 2.3743   | 2.5550   |
| Frc consts --  | 0.1547   | 0.2121   | 0.2943   |
| IR Inten --    | 0.3795   | 5.1335   | 5.9600   |
| Raman Activ -- | 1.4771   | 0.9412   | 0.7367   |
| Depolar (P) -- | 0.6335   | 0.6085   | 0.3411   |
| Depolar (U) -- | 0.7756   | 0.7566   | 0.5086   |
| Dip. str. --   | 4.7523   | 52.5943  | 53.7737  |
| Rot. str. --   | -0.1644  | -3.7267  | -7.6245  |
|                | 63       | 62       | 61       |
|                | A        | A        | A        |
| Frequencies -- | 471.2945 | 508.4202 | 533.3810 |
| Red. masses -- | 2.5668   | 2.9481   | 2.7419   |
| Frc consts --  | 0.3359   | 0.4490   | 0.4596   |
| IR Inten --    | 0.1488   | 5.4902   | 2.5347   |
| Raman Activ -- | 0.7232   | 3.6121   | 3.1463   |
| Depolar (P) -- | 0.7443   | 0.1015   | 0.6011   |
| Depolar (U) -- | 0.8534   | 0.1843   | 0.7509   |
| Dip. str. --   | 1.2597   | 43.0800  | 18.9585  |
| Rot. str. --   | 1.2430   | -3.7252  | 0.2372   |
|                | 60       | 59       | 58       |
|                | A        | A        | A        |
| Frequencies -- | 564.5928 | 615.8598 | 686.2351 |
| Red. masses -- | 2.8914   | 2.9734   | 3.8756   |
| Frc consts --  | 0.5430   | 0.6644   | 1.0753   |
| IR Inten --    | 7.2119   | 0.3977   | 5.1902   |
| Raman Activ -- | 1.3593   | 1.6266   | 9.6501   |
| Depolar (P) -- | 0.6804   | 0.7439   | 0.1589   |
| Depolar (U) -- | 0.8098   | 0.8531   | 0.2743   |
| Dip. str. --   | 50.9594  | 2.5760   | 30.1729  |
| Rot. str. --   | -3.4835  | 6.6101   | -13.0300 |
|                | 57       | 56       | 55       |
|                | A        | A        | A        |
| Frequencies -- | 727.1400 | 765.8340 | 808.4666 |
| Red. masses -- | 1.1557   | 2.9397   | 2.1342   |
| Frc consts --  | 0.3600   | 1.0158   | 0.8219   |
| IR Inten --    | 0.7139   | 8.1689   | 4.4569   |
| Raman Activ -- | 3.5564   | 14.2322  | 2.5887   |
| Depolar (P) -- | 0.4741   | 0.1880   | 0.5988   |
| Depolar (U) -- | 0.6433   | 0.3165   | 0.7490   |
| Dip. str. --   | 3.9168   | 42.5536  | 21.9925  |
| Rot. str. --   | 10.9213  | 4.9539   | 7.9921   |
|                | 54       | 53       | 52       |
|                | A        | A        | A        |
| Frequencies -- | 860.4676 | 896.9499 | 901.5241 |

## Supplementary Material (ESI) for PCCP

This journal is © the Owner Societies 2009

|             |    |           |           |           |
|-------------|----|-----------|-----------|-----------|
| Red. masses | -- | 2.7584    | 2.1500    | 2.1030    |
| Frc consts  | -- | 1.2033    | 1.0191    | 1.0070    |
| IR Inten    | -- | 12.0478   | 4.7361    | 3.3329    |
| Raman Activ | -- | 1.8923    | 5.6200    | 1.5435    |
| Depolar (P) | -- | 0.4352    | 0.3397    | 0.6980    |
| Depolar (U) | -- | 0.6064    | 0.5071    | 0.8221    |
| Dip. str.   | -- | 55.8573   | 21.0650   | 14.7488   |
| Rot. str.   | -- | -2.7220   | -3.6065   | 0.9582    |
|             |    | 51        | 50        | 49        |
|             |    | A         | A         | A         |
| Frequencies | -- | 919.1968  | 926.5789  | 986.2541  |
| Red. masses | -- | 1.3699    | 1.8070    | 1.9813    |
| Frc consts  | -- | 0.6820    | 0.9141    | 1.1355    |
| IR Inten    | -- | 33.4138   | 0.8801    | 2.2232    |
| Raman Activ | -- | 0.2265    | 0.7636    | 1.0585    |
| Depolar (P) | -- | 0.7031    | 0.1319    | 0.6330    |
| Depolar (U) | -- | 0.8257    | 0.2330    | 0.7752    |
| Dip. str.   | -- | 145.0187  | 3.7895    | 8.9929    |
| Rot. str.   | -- | -25.6171  | 3.0304    | -4.9551   |
|             |    | 48        | 47        | 46        |
|             |    | A         | A         | A         |
| Frequencies | -- | 990.5512  | 1009.3446 | 1025.9948 |
| Red. masses | -- | 1.4036    | 1.4257    | 2.0894    |
| Frc consts  | -- | 0.8114    | 0.8557    | 1.2959    |
| IR Inten    | -- | 1.5963    | 5.1067    | 6.4968    |
| Raman Activ | -- | 0.6601    | 2.8910    | 4.4205    |
| Depolar (P) | -- | 0.7117    | 0.7500    | 0.1988    |
| Depolar (U) | -- | 0.8315    | 0.8571    | 0.3316    |
| Dip. str.   | -- | 6.4290    | 20.1840   | 25.2615   |
| Rot. str.   | -- | 17.3037   | -23.0592  | 3.5764    |
|             |    | 45        | 44        | 43        |
|             |    | A         | A         | A         |
| Frequencies | -- | 1041.8106 | 1051.0444 | 1056.6449 |
| Red. masses | -- | 1.5765    | 1.5041    | 1.5589    |
| Frc consts  | -- | 1.0081    | 0.9790    | 1.0255    |
| IR Inten    | -- | 3.0544    | 2.9023    | 1.0782    |
| Raman Activ | -- | 5.0536    | 6.7965    | 0.9870    |
| Depolar (P) | -- | 0.7492    | 0.7459    | 0.7324    |
| Depolar (U) | -- | 0.8566    | 0.8545    | 0.8455    |
| Dip. str.   | -- | 11.6963   | 11.0162   | 4.0706    |
| Rot. str.   | -- | -10.9055  | -16.4863  | 13.8265   |
|             |    | 42        | 41        | 40        |
|             |    | A         | A         | A         |
| Frequencies | -- | 1096.9966 | 1104.6818 | 1132.9765 |
| Red. masses | -- | 2.1548    | 2.1731    | 2.6057    |
| Frc consts  | -- | 1.5278    | 1.5625    | 1.9707    |
| IR Inten    | -- | 3.5810    | 7.9672    | 8.8199    |
| Raman Activ | -- | 2.8301    | 4.8760    | 2.4725    |
| Depolar (P) | -- | 0.2318    | 0.6748    | 0.6894    |
| Depolar (U) | -- | 0.3763    | 0.8059    | 0.8161    |
| Dip. str.   | -- | 13.0230   | 28.7725   | 31.0564   |
| Rot. str.   | -- | -6.0771   | -6.4038   | -10.6400  |
|             |    | 39        | 38        | 37        |
|             |    | A         | A         | A         |
| Frequencies | -- | 1201.1126 | 1223.2484 | 1231.5315 |
| Red. masses | -- | 1.4455    | 1.6339    | 1.4382    |
| Frc consts  | -- | 1.2286    | 1.4404    | 1.2852    |
| IR Inten    | -- | 1.2189    | 13.0137   | 3.2397    |
| Raman Activ | -- | 1.7032    | 7.8608    | 2.3377    |
| Depolar (P) | -- | 0.5836    | 0.6923    | 0.7280    |
| Depolar (U) | -- | 0.7371    | 0.8182    | 0.8426    |
| Dip. str.   | -- | 4.0483    | 42.4417   | 10.4947   |
| Rot. str.   | -- | 13.0281   | 1.8370    | -9.8762   |
|             |    | 36        | 35        | 34        |
|             |    | A         | A         | A         |
| Frequencies | -- | 1271.8708 | 1298.2323 | 1307.5949 |
| Red. masses | -- | 1.3976    | 2.8043    | 1.2205    |
| Frc consts  | -- | 1.3321    | 2.7847    | 1.2296    |
| IR Inten    | -- | 3.6988    | 3.7707    | 1.1157    |
| Raman Activ | -- | 3.7495    | 0.6473    | 9.9301    |
| Depolar (P) | -- | 0.5892    | 0.4520    | 0.5503    |
| Depolar (U) | -- | 0.7415    | 0.6225    | 0.7099    |
| Dip. str.   | -- | 11.6019   | 11.5873   | 3.4038    |
| Rot. str.   | -- | 15.0646   | 1.4815    | 3.0897    |
|             |    | 33        | 32        | 31        |
|             |    | A         | A         | A         |
| Frequencies | -- | 1321.0146 | 1328.5996 | 1364.1964 |
| Red. masses | -- | 1.2604    | 1.3959    | 1.4014    |
| Frc consts  | -- | 1.2959    | 1.4518    | 1.5366    |
| IR Inten    | -- | 2.7712    | 4.4606    | 2.2609    |
| Raman Activ | -- | 8.0520    | 3.8670    | 4.8032    |
| Depolar (P) | -- | 0.5927    | 0.5448    | 0.6892    |
| Depolar (U) | -- | 0.7442    | 0.7054    | 0.8160    |
| Dip. str.   | -- | 8.3690    | 13.3940   | 6.6118    |
| Rot. str.   | -- | -7.9872   | 23.6981   | -9.6315   |
|             |    | 30        | 29        | 28        |
|             |    | A         | A         | A         |
| Frequencies | -- | 1379.0330 | 1383.8811 | 1396.4718 |
| Red. masses | -- | 1.5878    | 1.5988    | 1.3607    |
| Frc consts  | -- | 1.7791    | 1.8040    | 1.5634    |
| IR Inten    | -- | 0.7700    | 1.8435    | 0.9875    |
| Raman Activ | -- | 5.4724    | 3.4006    | 3.6156    |
| Depolar (P) | -- | 0.4091    | 0.7398    | 0.6059    |
| Depolar (U) | -- | 0.5806    | 0.8504    | 0.7546    |
| Dip. str.   | -- | 2.2275    | 5.3143    | 2.8212    |
| Rot. str.   | -- | -2.7454   | 6.0277    | 7.4887    |
|             |    | 27        | 26        | 25        |
|             |    | A         | A         | A         |
| Frequencies | -- | 1398.3006 | 1430.1713 | 1442.8460 |
| Red. masses | -- | 1.3753    | 1.1741    | 1.2534    |
| Frc consts  | -- | 1.5843    | 1.4149    | 1.5374    |
| IR Inten    | -- | 13.1765   | 0.1672    | 3.0659    |
| Raman Activ | -- | 3.6147    | 22.1754   | 28.4106   |
| Depolar (P) | -- | 0.7424    | 0.4831    | 0.7129    |
| Depolar (U) | -- | 0.8522    | 0.6515    | 0.8324    |
| Dip. str.   | -- | 37.5929   | 0.4663    | 8.4771    |
| Rot. str.   | -- | -9.7676   | -0.4315   | 0.1819    |

## Supplementary Material (ESI) for PCCP

This journal is © the Owner Societies 2009

|                | 24        | 23        | 22        |
|----------------|-----------|-----------|-----------|
|                | A         | A         | A         |
| Frequencies -- | 1446.4991 | 1448.4297 | 1452.0763 |
| Red. masses -- | 1.1150    | 1.0824    | 1.0623    |
| Frc consts --  | 1.3746    | 1.3379    | 1.3197    |
| IR Inten --    | 4.7712    | 3.4740    | 9.2243    |
| Raman Activ -- | 6.3794    | 3.1964    | 14.9657   |
| Depolar (P) -- | 0.5731    | 0.7201    | 0.7478    |
| Depolar (U) -- | 0.7287    | 0.8373    | 0.8557    |
| Dip. str. --   | 13.1589   | 9.5683    | 25.3425   |
| Rot. str. --   | 15.6105   | 1.9653    | 0.8608    |
|                | 21        | 20        | 19        |
|                | A         | A         | A         |
| Frequencies -- | 1460.7771 | 1466.6541 | 1467.7823 |
| Red. masses -- | 1.0749    | 1.0716    | 1.0943    |
| Frc consts --  | 1.3514    | 1.3581    | 1.3890    |
| IR Inten --    | 8.1706    | 11.4713   | 2.2843    |
| Raman Activ -- | 12.2399   | 6.5424    | 4.3075    |
| Depolar (P) -- | 0.7492    | 0.7226    | 0.6764    |
| Depolar (U) -- | 0.8566    | 0.8390    | 0.8070    |
| Dip. str. --   | 22.3140   | 31.2027   | 6.2087    |
| Rot. str. --   | -5.3058   | -5.8881   | -2.5107   |
|                | 18        | 17        | 16        |
|                | A         | A         | A         |
| Frequencies -- | 1495.1839 | 1714.7129 | 3006.8369 |
| Red. masses -- | 2.3504    | 5.5544    | 1.0809    |
| Frc consts --  | 3.0958    | 9.6221    | 5.7578    |
| IR Inten --    | 6.9984    | 19.0776   | 9.9637    |
| Raman Activ -- | 4.5506    | 29.3685   | 38.1458   |
| Depolar (P) -- | 0.2555    | 0.1725    | 0.5577    |
| Depolar (U) -- | 0.4070    | 0.2943    | 0.7161    |
| Dip. str. --   | 18.6730   | 44.3852   | 13.2196   |
| Rot. str. --   | 13.6975   | -1.7668   | -14.5978  |
|                | 15        | 14        | 13        |
|                | A         | A         | A         |
| Frequencies -- | 3011.0170 | 3024.0964 | 3028.2543 |
| Red. masses -- | 1.0619    | 1.0399    | 1.0379    |
| Frc consts --  | 5.6723    | 5.6030    | 5.6076    |
| IR Inten --    | 34.1740   | 12.3078   | 37.6973   |
| Raman Activ -- | 87.6012   | 428.6812  | 164.4477  |
| Depolar (P) -- | 0.1662    | 0.4952    | 0.0289    |
| Depolar (U) -- | 0.2850    | 0.6624    | 0.0561    |
| Dip. str. --   | 45.2783   | 16.2365   | 49.6622   |
| Rot. str. --   | 10.6488   | -20.2313  | -12.6741  |
|                | 12        | 11        | 10        |
|                | A         | A         | A         |
| Frequencies -- | 3031.7345 | 3039.2070 | 3050.3130 |
| Red. masses -- | 1.0594    | 1.0684    | 1.0938    |
| Frc consts --  | 5.7370    | 5.8144    | 5.9963    |
| IR Inten --    | 25.7213   | 15.6948   | 36.3495   |
| Raman Activ -- | 126.2502  | 122.9988  | 115.6233  |
| Depolar (P) -- | 0.2143    | 0.1052    | 0.2835    |
| Depolar (U) -- | 0.3530    | 0.1904    | 0.4418    |
| Dip. str. --   | 33.8462   | 20.6016   | 47.5403   |
| Rot. str. --   | 22.8392   | -33.6312  | 28.4563   |
|                | 9         | 8         | 7         |
|                | A         | A         | A         |
| Frequencies -- | 3072.0900 | 3078.7209 | 3087.5272 |
| Red. masses -- | 1.1006    | 1.0986    | 1.0966    |
| Frc consts --  | 6.1198    | 6.1353    | 6.1590    |
| IR Inten --    | 11.9208   | 28.0974   | 36.9866   |
| Raman Activ -- | 64.2126   | 747.1282  | 116.7125  |
| Depolar (P) -- | 0.6242    | 0.7484    | 0.3510    |
| Depolar (U) -- | 0.7686    | 0.8561    | 0.5196    |
| Dip. str. --   | 15.4802   | 36.4086   | 47.7904   |
| Rot. str. --   | 30.2078   | -22.0208  | -21.7268  |
|                | 6         | 5         | 4         |
|                | A         | A         | A         |
| Frequencies -- | 3089.9491 | 3094.5557 | 3116.6009 |
| Red. masses -- | 1.0979    | 1.1009    | 1.1007    |
| Frc consts --  | 6.1762    | 6.2112    | 6.2993    |
| IR Inten --    | 29.6291   | 29.1079   | 22.8152   |
| Raman Activ -- | 110.0853  | 85.6032   | 161.4995  |
| Depolar (P) -- | 0.3892    | 0.7493    | 0.7398    |
| Depolar (U) -- | 0.5603    | 0.8567    | 0.8505    |
| Dip. str. --   | 38.2538   | 37.5250   | 29.2045   |
| Rot. str. --   | 11.0439   | -16.4406  | 0.6243    |
|                | 3         | 2         | 1         |
|                | A         | A         | A         |
| Frequencies -- | 3121.8161 | 3128.9718 | 3218.4550 |
| Red. masses -- | 1.1016    | 1.0608    | 1.1156    |
| Frc consts --  | 6.3253    | 6.1189    | 6.8087    |
| IR Inten --    | 19.9521   | 10.6078   | 20.2924   |
| Raman Activ -- | 77.6553   | 144.9458  | 91.6262   |
| Depolar (P) -- | 0.6860    | 0.1356    | 0.7165    |
| Depolar (U) -- | 0.8137    | 0.2389    | 0.8348    |
| Dip. str. --   | 25.4969   | 13.5248   | 25.1532   |
| Rot. str. --   | 3.5524    | 10.6925   | 15.3623   |

## S-(-)-Limonene Oxide, eq-t255 (1.9 kJ/mol)

Harmonic frequencies (cm<sup>-1</sup>), IR intensities (KM/Mole), Raman scattering activities (A<sup>4</sup>/AMU), depolarization ratios for plane and unpolarized incident light, reduced masses (AMU), force constants (mDyne/A), Dipole strengths (10<sup>-40</sup> esu<sup>2</sup>-cm<sup>2</sup>), Rotational strengths (10<sup>-44</sup> esu<sup>2</sup>-cm<sup>2</sup>), and normal coordinates:

|                | 75      | 74      | 73       |
|----------------|---------|---------|----------|
|                | A       | A       | A        |
| Frequencies -- | 43.2349 | 67.7663 | 172.3330 |
| Red. masses -- | 2.6335  | 3.2331  | 2.0986   |
| Frc consts --  | 0.0029  | 0.0087  | 0.0367   |
| IR Inten --    | 0.1164  | 0.5806  | 0.4133   |
| Raman Activ -- | 2.8535  | 0.3776  | 1.0535   |



Supplementary Material (ESI) for *PCCP*

This journal is © the Owner Societies 2009

|                |           |           |           |
|----------------|-----------|-----------|-----------|
| Depolar (P) -- | 0.7491    | 0.7500    | 0.7257    |
| Depolar (U) -- | 0.8565    | 0.8571    | 0.8411    |
| Dip. str. --   | 10.7427   | 34.1806   | 9.5674    |
| Rot. str. --   | -1.0686   | -1.2162   | 0.2353    |
|                | 72        | 71        | 70        |
|                | A         | A         | A         |
| Frequencies -- | 179.9088  | 186.8771  | 209.7194  |
| Red. masses -- | 1.1336    | 1.3471    | 2.1758    |
| Frc consts --  | 0.0216    | 0.0277    | 0.0564    |
| IR Inten --    | 0.5071    | 0.1573    | 1.0958    |
| Raman Activ -- | 0.0572    | 0.5246    | 0.6466    |
| Depolar (P) -- | 0.7160    | 0.7346    | 0.7219    |
| Depolar (U) -- | 0.8345    | 0.8470    | 0.8385    |
| Dip. str. --   | 11.2454   | 3.3586    | 20.8454   |
| Rot. str. --   | -0.7357   | 2.7835    | -2.3957   |
|                | 69        | 68        | 67        |
|                | A         | A         | A         |
| Frequencies -- | 241.7411  | 286.3539  | 317.9392  |
| Red. masses -- | 2.1874    | 3.7222    | 2.5399    |
| Frc consts --  | 0.0753    | 0.1798    | 0.1513    |
| IR Inten --    | 0.9155    | 0.1381    | 1.7687    |
| Raman Activ -- | 0.7553    | 2.5696    | 0.4315    |
| Depolar (P) -- | 0.4390    | 0.3047    | 0.2960    |
| Depolar (U) -- | 0.6102    | 0.4670    | 0.4567    |
| Dip. str. --   | 15.1088   | 1.9240    | 22.1932   |
| Rot. str. --   | 4.4809    | 0.6603    | 6.4317    |
|                | 66        | 65        | 64        |
|                | A         | A         | A         |
| Frequencies -- | 334.9659  | 392.9259  | 430.6567  |
| Red. masses -- | 2.2532    | 2.3090    | 2.9737    |
| Frc consts --  | 0.1490    | 0.2100    | 0.3249    |
| IR Inten --    | 0.6325    | 5.1978    | 3.0186    |
| Raman Activ -- | 1.8172    | 1.0398    | 0.6823    |
| Depolar (P) -- | 0.7464    | 0.3584    | 0.6786    |
| Depolar (U) -- | 0.8548    | 0.5277    | 0.8085    |
| Dip. str. --   | 7.5331    | 52.7734   | 27.9632   |
| Rot. str. --   | 0.7353    | -2.8558   | -7.2398   |
|                | 63        | 62        | 61        |
|                | A         | A         | A         |
| Frequencies -- | 459.3628  | 492.6721  | 546.0809  |
| Red. masses -- | 2.7012    | 2.7057    | 2.5030    |
| Frc consts --  | 0.3358    | 0.3869    | 0.4398    |
| IR Inten --    | 3.9983    | 1.4332    | 1.4712    |
| Raman Activ -- | 0.8588    | 1.6690    | 4.0201    |
| Depolar (P) -- | 0.7482    | 0.4092    | 0.2848    |
| Depolar (U) -- | 0.8559    | 0.5808    | 0.4433    |
| Dip. str. --   | 34.7240   | 11.6054   | 10.7481   |
| Rot. str. --   | -5.0280   | -10.7225  | -9.0541   |
|                | 60        | 59        | 58        |
|                | A         | A         | A         |
| Frequencies -- | 558.0639  | 616.2449  | 688.2148  |
| Red. masses -- | 3.0166    | 2.9532    | 3.9432    |
| Frc consts --  | 0.5535    | 0.6608    | 1.1004    |
| IR Inten --    | 7.3995    | 0.5140    | 5.5869    |
| Raman Activ -- | 1.6836    | 1.5584    | 11.1238   |
| Depolar (P) -- | 0.6949    | 0.7308    | 0.1605    |
| Depolar (U) -- | 0.8200    | 0.8445    | 0.2767    |
| Dip. str. --   | 52.8961   | 3.3278    | 32.3856   |
| Rot. str. --   | 25.5490   | 7.5581    | -5.4163   |
|                | 57        | 56        | 55        |
|                | A         | A         | A         |
| Frequencies -- | 713.9844  | 774.9242  | 818.9456  |
| Red. masses -- | 1.2053    | 2.7104    | 1.8849    |
| Frc consts --  | 0.3620    | 0.9590    | 0.7448    |
| IR Inten --    | 0.4987    | 7.1172    | 5.3156    |
| Raman Activ -- | 6.3689    | 12.1035   | 0.8192    |
| Depolar (P) -- | 0.3657    | 0.2946    | 0.3201    |
| Depolar (U) -- | 0.5356    | 0.4551    | 0.4849    |
| Dip. str. --   | 2.7864    | 36.6400   | 25.8943   |
| Rot. str. --   | 2.0531    | 5.7809    | 6.2318    |
|                | 54        | 53        | 52        |
|                | A         | A         | A         |
| Frequencies -- | 863.7317  | 899.8402  | 913.3714  |
| Red. masses -- | 2.9090    | 1.8972    | 2.2464    |
| Frc consts --  | 1.2786    | 0.9051    | 1.1042    |
| IR Inten --    | 13.9804   | 2.7590    | 3.8965    |
| Raman Activ -- | 2.8283    | 2.1278    | 4.6195    |
| Depolar (P) -- | 0.4979    | 0.7272    | 0.3877    |
| Depolar (U) -- | 0.6648    | 0.8421    | 0.5588    |
| Dip. str. --   | 64.5728   | 12.2317   | 17.0191   |
| Rot. str. --   | 2.8033    | -11.5625  | 16.4830   |
|                | 51        | 50        | 49        |
|                | A         | A         | A         |
| Frequencies -- | 921.1603  | 927.1475  | 983.0285  |
| Red. masses -- | 1.4217    | 1.8924    | 1.8640    |
| Frc consts --  | 0.7108    | 0.9584    | 1.0613    |
| IR Inten --    | 29.9674   | 2.2436    | 2.8706    |
| Raman Activ -- | 0.6588    | 1.6450    | 1.4340    |
| Depolar (P) -- | 0.4140    | 0.1094    | 0.7346    |
| Depolar (U) -- | 0.5856    | 0.1972    | 0.8470    |
| Dip. str. --   | 129.7839  | 9.6541    | 11.6498   |
| Rot. str. --   | -10.4612  | -0.0385   | -9.9135   |
|                | 48        | 47        | 46        |
|                | A         | A         | A         |
| Frequencies -- | 997.2853  | 1003.1976 | 1019.8663 |
| Red. masses -- | 1.6683    | 1.4181    | 1.8073    |
| Frc consts --  | 0.9776    | 0.8409    | 1.1075    |
| IR Inten --    | 1.5017    | 4.3935    | 4.4355    |
| Raman Activ -- | 1.5946    | 4.4870    | 0.6790    |
| Depolar (P) -- | 0.4286    | 0.7040    | 0.6894    |
| Depolar (U) -- | 0.6000    | 0.8263    | 0.8162    |
| Dip. str. --   | 6.0071    | 17.4717   | 17.3503   |
| Rot. str. --   | -1.2388   | -15.0126  | 33.5212   |
|                | 45        | 44        | 43        |
|                | A         | A         | A         |
| Frequencies -- | 1039.2986 | 1052.1529 | 1056.0378 |
| Red. masses -- | 1.7080    | 1.4467    | 1.5611    |

## Supplementary Material (ESI) for PCCP

This journal is © the Owner Societies 2009

|             |    |           |           |           |
|-------------|----|-----------|-----------|-----------|
| Frc consts  | -- | 1.0870    | 0.9436    | 1.0258    |
| IR Inten    | -- | 4.2748    | 0.8610    | 2.8216    |
| Raman Activ | -- | 3.4499    | 6.5502    | 2.2619    |
| Depolar (P) | -- | 0.3150    | 0.7385    | 0.7498    |
| Depolar (U) | -- | 0.4791    | 0.8496    | 0.8570    |
| Dip. str.   | -- | 16.4090   | 3.2645    | 10.6593   |
| Rot. str.   | -- | -23.2088  | -6.9504   | 7.3501    |
|             |    | 42        | 41        | 40        |
|             |    | A         | A         | A         |
| Frequencies | -- | 1098.9442 | 1110.4626 | 1139.2178 |
| Red. masses | -- | 2.1117    | 2.2190    | 2.5475    |
| Frc consts  | -- | 1.5026    | 1.6122    | 1.9480    |
| IR Inten    | -- | 0.9565    | 11.1631   | 4.2359    |
| Raman Activ | -- | 2.9063    | 3.1593    | 2.2065    |
| Depolar (P) | -- | 0.1082    | 0.6821    | 0.7498    |
| Depolar (U) | -- | 0.1952    | 0.8110    | 0.8570    |
| Dip. str.   | -- | 3.4723    | 40.1042   | 14.8337   |
| Rot. str.   | -- | 1.5436    | 10.3177   | -8.6360   |
|             |    | 39        | 38        | 37        |
|             |    | A         | A         | A         |
| Frequencies | -- | 1199.9862 | 1219.9034 | 1225.5819 |
| Red. masses | -- | 1.4374    | 1.3502    | 1.7899    |
| Frc consts  | -- | 1.2195    | 1.1838    | 1.5841    |
| IR Inten    | -- | 1.1916    | 5.4541    | 17.0413   |
| Raman Activ | -- | 1.3908    | 6.7353    | 4.4487    |
| Depolar (P) | -- | 0.6032    | 0.6424    | 0.7068    |
| Depolar (U) | -- | 0.7525    | 0.7823    | 0.8282    |
| Dip. str.   | -- | 3.9616    | 17.8364   | 55.4712   |
| Rot. str.   | -- | 13.1185   | -18.0466  | -13.5077  |
|             |    | 36        | 35        | 34        |
|             |    | A         | A         | A         |
| Frequencies | -- | 1263.9822 | 1276.8407 | 1316.9175 |
| Red. masses | -- | 1.5880    | 1.4967    | 1.3458    |
| Frc consts  | -- | 1.4948    | 1.4376    | 1.3752    |
| IR Inten    | -- | 2.4962    | 4.5343    | 1.0909    |
| Raman Activ | -- | 2.6393    | 2.5371    | 9.7718    |
| Depolar (P) | -- | 0.4758    | 0.7396    | 0.7483    |
| Depolar (U) | -- | 0.6448    | 0.8503    | 0.8560    |
| Dip. str.   | -- | 7.8785    | 14.1672   | 3.3049    |
| Rot. str.   | -- | 6.0540    | 13.1883   | 18.6134   |
|             |    | 33        | 32        | 31        |
|             |    | A         | A         | A         |
| Frequencies | -- | 1322.7217 | 1337.7138 | 1354.5261 |
| Red. masses | -- | 1.3053    | 1.4540    | 1.4498    |
| Frc consts  | -- | 1.3456    | 1.5330    | 1.5673    |
| IR Inten    | -- | 5.6619    | 1.7548    | 1.6980    |
| Raman Activ | -- | 7.1525    | 1.1995    | 5.5722    |
| Depolar (P) | -- | 0.5228    | 0.7133    | 0.5708    |
| Depolar (U) | -- | 0.6866    | 0.8327    | 0.7267    |
| Dip. str.   | -- | 17.0766   | 5.2331    | 5.0009    |
| Rot. str.   | -- | -5.9334   | 14.7852   | -2.9811   |
|             |    | 30        | 29        | 28        |
|             |    | A         | A         | A         |
| Frequencies | -- | 1381.7732 | 1393.3824 | 1397.2876 |
| Red. masses | -- | 1.7574    | 1.2664    | 1.3893    |
| Frc consts  | -- | 1.9770    | 1.4486    | 1.5982    |
| IR Inten    | -- | 1.5232    | 3.6358    | 7.7769    |
| Raman Activ | -- | 2.5150    | 5.1916    | 2.7889    |
| Depolar (P) | -- | 0.2070    | 0.6445    | 0.6761    |
| Depolar (U) | -- | 0.3430    | 0.7838    | 0.8068    |
| Dip. str.   | -- | 4.3978    | 10.4097   | 22.2037   |
| Rot. str.   | -- | 0.5283    | -4.0164   | 3.1218    |
|             |    | 27        | 26        | 25        |
|             |    | A         | A         | A         |
| Frequencies | -- | 1402.0446 | 1428.9510 | 1443.6690 |
| Red. masses | -- | 1.7054    | 1.1709    | 1.2819    |
| Frc consts  | -- | 1.9751    | 1.4086    | 1.5741    |
| IR Inten    | -- | 0.8569    | 0.5833    | 3.3828    |
| Raman Activ | -- | 4.7485    | 32.2556   | 26.1768   |
| Depolar (P) | -- | 0.7189    | 0.5693    | 0.6663    |
| Depolar (U) | -- | 0.8365    | 0.7256    | 0.7997    |
| Dip. str.   | -- | 2.4382    | 1.6286    | 9.3479    |
| Rot. str.   | -- | -0.2457   | -1.2201   | -5.9957   |
|             |    | 24        | 23        | 22        |
|             |    | A         | A         | A         |
| Frequencies | -- | 1447.6619 | 1450.1593 | 1452.3257 |
| Red. masses | -- | 1.0904    | 1.0869    | 1.0543    |
| Frc consts  | -- | 1.3464    | 1.3467    | 1.3102    |
| IR Inten    | -- | 7.2699    | 6.3274    | 2.9432    |
| Raman Activ | -- | 4.4210    | 1.8320    | 7.5554    |
| Depolar (P) | -- | 0.7104    | 0.5986    | 0.7490    |
| Depolar (U) | -- | 0.8307    | 0.7489    | 0.8565    |
| Dip. str.   | -- | 20.0340   | 17.4068   | 8.0846    |
| Rot. str.   | -- | 4.3915    | 3.8288    | -0.5944   |
|             |    | 21        | 20        | 19        |
|             |    | A         | A         | A         |
| Frequencies | -- | 1460.8801 | 1465.7247 | 1470.1093 |
| Red. masses | -- | 1.0736    | 1.0729    | 1.0979    |
| Frc consts  | -- | 1.3500    | 1.3580    | 1.3980    |
| IR Inten    | -- | 7.1234    | 15.8748   | 0.1606    |
| Raman Activ | -- | 13.3301   | 4.5789    | 4.5908    |
| Depolar (P) | -- | 0.7495    | 0.7011    | 0.6951    |
| Depolar (U) | -- | 0.8568    | 0.8243    | 0.8201    |
| Dip. str.   | -- | 19.4528   | 43.2079   | 0.4359    |
| Rot. str.   | -- | 6.7849    | -4.7486   | 1.6397    |
|             |    | 18        | 17        | 16        |
|             |    | A         | A         | A         |
| Frequencies | -- | 1496.2724 | 1716.6744 | 2967.3942 |
| Red. masses | -- | 2.3709    | 5.4827    | 1.0813    |
| Frc consts  | -- | 3.1274    | 9.5196    | 5.6098    |
| IR Inten    | -- | 5.4261    | 19.6312   | 22.9713   |
| Raman Activ | -- | 4.1979    | 22.8321   | 62.4501   |
| Depolar (P) | -- | 0.2571    | 0.1265    | 0.2704    |
| Depolar (U) | -- | 0.4090    | 0.2246    | 0.4256    |
| Dip. str.   | -- | 14.4671   | 45.6212   | 30.8828   |
| Rot. str.   | -- | 12.5387   | 5.8295    | -12.6224  |
|             |    | 15        | 14        | 13        |

Supplementary Material (ESI) for PCCP

This journal is © the Owner Societies 2009

|                |           |           |           |
|----------------|-----------|-----------|-----------|
| A              |           |           |           |
| Frequencies -- | 3010.3486 | 3015.4286 | 3027.3906 |
| Red. masses -- | 1.0599    | 1.0396    | 1.0605    |
| Frc consts --  | 5.6590    | 5.5697    | 5.7266    |
| IR Inten --    | 29.3399   | 23.8582   | 33.1855   |
| Raman Activ -- | 52.2591   | 143.3552  | 44.6887   |
| Depolar (P) -- | 0.2040    | 0.0182    | 0.2161    |
| Depolar (U) -- | 0.3388    | 0.0358    | 0.3554    |
| Dip. str. --   | 38.8820   | 31.5643   | 43.7308   |
| Rot. str. --   | -4.4582   | 14.3865   | -1.2463   |
| 12             |           |           |           |
| A              |           |           |           |
| Frequencies -- | 3028.2750 | 3041.1950 | 3052.6385 |
| Red. masses -- | 1.0388    | 1.0755    | 1.0853    |
| Frc consts --  | 5.6126    | 5.8607    | 5.9585    |
| IR Inten --    | 26.5229   | 11.0953   | 34.7961   |
| Raman Activ -- | 219.1263  | 72.8882   | 100.2980  |
| Depolar (P) -- | 0.0281    | 0.3769    | 0.1920    |
| Depolar (U) -- | 0.0547    | 0.5474    | 0.3221    |
| Dip. str. --   | 34.9408   | 14.5547   | 45.4739   |
| Rot. str. --   | 24.5218   | -24.7294  | 35.1566   |
| 9              |           |           |           |
| A              |           |           |           |
| Frequencies -- | 3066.6612 | 3073.4995 | 3088.0249 |
| Red. masses -- | 1.0994    | 1.0983    | 1.0925    |
| Frc consts --  | 6.0918    | 6.1127    | 6.1383    |
| IR Inten --    | 26.9037   | 8.7273    | 58.9848   |
| Raman Activ -- | 61.5238   | 48.0734   | 125.3312  |
| Depolar (P) -- | 0.7161    | 0.7109    | 0.2019    |
| Depolar (U) -- | 0.8346    | 0.8310    | 0.3360    |
| Dip. str. --   | 34.9989   | 11.3281   | 76.2021   |
| Rot. str. --   | -21.2501  | 21.3687   | -30.9413  |
| 6              |           |           |           |
| A              |           |           |           |
| Frequencies -- | 3091.8403 | 3094.4799 | 3114.8821 |
| Red. masses -- | 1.1035    | 1.1010    | 1.1001    |
| Frc consts --  | 6.2150    | 6.2116    | 6.2886    |
| IR Inten --    | 13.3494   | 30.8793   | 23.3521   |
| Raman Activ -- | 91.9207   | 80.8164   | 77.0964   |
| Depolar (P) -- | 0.4511    | 0.7373    | 0.6798    |
| Depolar (U) -- | 0.6217    | 0.8488    | 0.8093    |
| Dip. str. --   | 17.2248   | 39.8095   | 29.9083   |
| Rot. str. --   | 9.2689    | -2.1302   | -6.7541   |
| 3              |           |           |           |
| A              |           |           |           |
| Frequencies -- | 3121.7011 | 3143.2220 | 3234.0211 |
| Red. masses -- | 1.1016    | 1.0618    | 1.1139    |
| Frc consts --  | 6.3247    | 6.1810    | 6.8639    |
| IR Inten --    | 20.1483   | 9.2146    | 16.2011   |
| Raman Activ -- | 77.1837   | 149.2426  | 66.2113   |
| Depolar (P) -- | 0.6877    | 0.1568    | 0.7496    |
| Depolar (U) -- | 0.8149    | 0.2711    | 0.8569    |
| Dip. str. --   | 25.7487   | 11.6953   | 19.9852   |
| Rot. str. --   | -6.0091   | 1.1135    | 3.9589    |

S-(-)-Limonene Oxide, eq-c110 (2.0 kJ/mol)

Harmonic frequencies (cm<sup>-1</sup>), IR intensities (KM/Mole), Raman scattering activities (A<sup>4</sup>/AMU), depolarization ratios for plane and unpolarized incident light, reduced masses (AMU), force constants (mDyne/A), Dipole strengths (10<sup>-40</sup> esu<sup>2</sup>-cm<sup>2</sup>), Rotational strengths (10<sup>-44</sup> esu<sup>2</sup>-cm<sup>2</sup>), and normal coordinates:

|                |          |          |          |
|----------------|----------|----------|----------|
| 75             |          |          |          |
| A              |          |          |          |
| Frequencies -- | 44.3399  | 78.4902  | 152.2659 |
| Red. masses -- | 2.5612   | 3.2379   | 2.4147   |
| Frc consts --  | 0.0030   | 0.0118   | 0.0330   |
| IR Inten --    | 0.0199   | 0.8542   | 0.4908   |
| Raman Activ -- | 4.7879   | 0.3468   | 1.0633   |
| Depolar (P) -- | 0.7149   | 0.6609   | 0.5215   |
| Depolar (U) -- | 0.8337   | 0.7958   | 0.6855   |
| Dip. str. --   | 1.7930   | 43.4150  | 12.8596  |
| Rot. str. --   | 0.4084   | -0.1490  | -4.0649  |
| 72             |          |          |          |
| A              |          |          |          |
| Frequencies -- | 176.3376 | 183.8388 | 205.4022 |
| Red. masses -- | 2.1469   | 1.1790   | 1.3460   |
| Frc consts --  | 0.0393   | 0.0235   | 0.0335   |
| IR Inten --    | 0.1723   | 0.4439   | 0.3555   |
| Raman Activ -- | 1.5497   | 0.2500   | 1.2507   |
| Depolar (P) -- | 0.6906   | 0.7248   | 0.4972   |
| Depolar (U) -- | 0.8170   | 0.8405   | 0.6642   |
| Dip. str. --   | 3.8987   | 9.6339   | 6.9053   |
| Rot. str. --   | 1.9851   | -1.8977  | -4.3990  |
| 69             |          |          |          |
| A              |          |          |          |
| Frequencies -- | 242.5618 | 263.7276 | 322.0328 |
| Red. masses -- | 1.8334   | 3.5051   | 2.4862   |
| Frc consts --  | 0.0636   | 0.1436   | 0.1519   |
| IR Inten --    | 0.5319   | 0.9666   | 0.4697   |
| Raman Activ -- | 1.2271   | 1.3954   | 1.7597   |
| Depolar (P) -- | 0.4658   | 0.2076   | 0.5830   |
| Depolar (U) -- | 0.6355   | 0.3438   | 0.7366   |
| Dip. str. --   | 8.7477   | 14.6210  | 5.8181   |
| Rot. str. --   | 0.4446   | 3.8799   | -0.0523  |
| 66             |          |          |          |
| A              |          |          |          |
| Frequencies -- | 335.0556 | 403.8537 | 413.5084 |
| Red. masses -- | 2.2613   | 3.2377   | 2.4619   |
| Frc consts --  | 0.1496   | 0.3111   | 0.2480   |
| IR Inten --    | 0.5342   | 8.9266   | 2.8860   |
| Raman Activ -- | 2.7904   | 1.2015   | 0.3650   |
| Depolar (P) -- | 0.4674   | 0.7342   | 0.7329   |

## Supplementary Material (ESI) for PCCP

This journal is © the Owner Societies 2009

|                |           |           |           |
|----------------|-----------|-----------|-----------|
| Depolar (U) -- | 0.6370    | 0.8467    | 0.8459    |
| Dip. str. --   | 6.3602    | 88.1800   | 27.8434   |
| Rot. str. --   | 1.1889    | 1.1770    | 5.5367    |
|                | 63        | 62        | 61        |
|                | A         | A         | A         |
| Frequencies -- | 468.3131  | 504.3282  | 537.2289  |
| Red. masses -- | 2.3779    | 2.3675    | 2.7890    |
| Frc consts --  | 0.3073    | 0.3548    | 0.4743    |
| IR Inten --    | 2.1602    | 2.5939    | 4.8973    |
| Raman Activ -- | 0.9852    | 3.4325    | 2.9469    |
| Depolar (P) -- | 0.5174    | 0.2570    | 0.7494    |
| Depolar (U) -- | 0.6819    | 0.4090    | 0.8567    |
| Dip. str. --   | 18.4022   | 20.5189   | 36.3664   |
| Rot. str. --   | 4.3230    | 9.6817    | 35.8176   |
|                | 60        | 59        | 58        |
|                | A         | A         | A         |
| Frequencies -- | 563.0603  | 637.4240  | 691.7206  |
| Red. masses -- | 3.1011    | 3.6544    | 4.0087    |
| Frc consts --  | 0.5793    | 0.8748    | 1.1301    |
| IR Inten --    | 5.3865    | 0.2974    | 4.5680    |
| Raman Activ -- | 1.8134    | 1.1828    | 12.9797   |
| Depolar (P) -- | 0.7000    | 0.7498    | 0.1561    |
| Depolar (U) -- | 0.8235    | 0.8570    | 0.2701    |
| Dip. str. --   | 38.1644   | 1.8616    | 26.3452   |
| Rot. str. --   | -24.2164  | -1.7780   | -8.9203   |
|                | 57        | 56        | 55        |
|                | A         | A         | A         |
| Frequencies -- | 729.4548  | 775.0722  | 798.8494  |
| Red. masses -- | 1.1499    | 3.5911    | 1.7280    |
| Frc consts --  | 0.3605    | 1.2710    | 0.6497    |
| IR Inten --    | 0.6053    | 12.2126   | 1.7916    |
| Raman Activ -- | 3.3719    | 8.5160    | 7.3552    |
| Depolar (P) -- | 0.6402    | 0.3669    | 0.1720    |
| Depolar (U) -- | 0.7806    | 0.5369    | 0.2935    |
| Dip. str. --   | 3.3106    | 62.8596   | 8.9469    |
| Rot. str. --   | -5.5859   | -11.5224  | -17.9866  |
|                | 54        | 53        | 52        |
|                | A         | A         | A         |
| Frequencies -- | 861.3084  | 889.0284  | 911.2981  |
| Red. masses -- | 2.3246    | 2.4587    | 1.9759    |
| Frc consts --  | 1.0160    | 1.1450    | 0.9668    |
| IR Inten --    | 10.6419   | 2.9530    | 4.2588    |
| Raman Activ -- | 3.7474    | 1.6722    | 3.0287    |
| Depolar (P) -- | 0.3273    | 0.7105    | 0.3525    |
| Depolar (U) -- | 0.4932    | 0.8307    | 0.5213    |
| Dip. str. --   | 49.2909   | 13.2511   | 18.6437   |
| Rot. str. --   | -10.5487  | -7.1934   | 4.5505    |
|                | 51        | 50        | 49        |
|                | A         | A         | A         |
| Frequencies -- | 923.1458  | 934.5593  | 964.7217  |
| Red. masses -- | 1.3537    | 1.7506    | 2.3511    |
| Frc consts --  | 0.6797    | 0.9009    | 1.2892    |
| IR Inten --    | 31.1585   | 0.5647    | 7.6563    |
| Raman Activ -- | 0.6564    | 2.7000    | 1.9797    |
| Depolar (P) -- | 0.6145    | 0.6272    | 0.5039    |
| Depolar (U) -- | 0.7613    | 0.7709    | 0.6701    |
| Dip. str. --   | 134.6520  | 2.4107    | 31.6609   |
| Rot. str. --   | 40.5397   | -4.2120   | 4.5628    |
|                | 48        | 47        | 46        |
|                | A         | A         | A         |
| Frequencies -- | 991.4750  | 1022.1258 | 1025.6687 |
| Red. masses -- | 1.4009    | 1.7934    | 1.5770    |
| Frc consts --  | 0.8114    | 1.1039    | 0.9774    |
| IR Inten --    | 1.7382    | 2.0208    | 3.8979    |
| Raman Activ -- | 0.8556    | 6.3606    | 4.3213    |
| Depolar (P) -- | 0.7451    | 0.1814    | 0.6414    |
| Depolar (U) -- | 0.8539    | 0.3071    | 0.7815    |
| Dip. str. --   | 6.9939    | 7.8871    | 15.1611   |
| Rot. str. --   | -13.8681  | -5.5085   | 38.8736   |
|                | 45        | 44        | 43        |
|                | A         | A         | A         |
| Frequencies -- | 1049.3804 | 1055.7343 | 1059.3687 |
| Red. masses -- | 1.4829    | 1.5220    | 1.6779    |
| Frc consts --  | 0.9621    | 0.9995    | 1.1095    |
| IR Inten --    | 4.2584    | 2.9197    | 4.1477    |
| Raman Activ -- | 2.5892    | 3.0555    | 5.8500    |
| Depolar (P) -- | 0.7228    | 0.7351    | 0.7447    |
| Depolar (U) -- | 0.8391    | 0.8473    | 0.8536    |
| Dip. str. --   | 16.1891   | 11.0328   | 15.6197   |
| Rot. str. --   | -10.6080  | 30.6018   | -2.8810   |
|                | 42        | 41        | 40        |
|                | A         | A         | A         |
| Frequencies -- | 1072.2565 | 1113.1006 | 1132.0021 |
| Red. masses -- | 1.9798    | 2.4576    | 2.2426    |
| Frc consts --  | 1.3411    | 1.7940    | 1.6932    |
| IR Inten --    | 6.8009    | 0.1340    | 13.6313   |
| Raman Activ -- | 4.9249    | 2.8175    | 2.6449    |
| Depolar (P) -- | 0.7493    | 0.6992    | 0.5740    |
| Depolar (U) -- | 0.8567    | 0.8229    | 0.7294    |
| Dip. str. --   | 25.3031   | 0.4803    | 48.0394   |
| Rot. str. --   | -8.0158   | -3.1404   | 15.9499   |
|                | 39        | 38        | 37        |
|                | A         | A         | A         |
| Frequencies -- | 1198.6424 | 1211.9734 | 1245.5159 |
| Red. masses -- | 1.4610    | 1.4640    | 1.5632    |
| Frc consts --  | 1.2368    | 1.2670    | 1.4288    |
| IR Inten --    | 13.5432   | 3.4262    | 5.7633    |
| Raman Activ -- | 3.2632    | 1.9774    | 0.8461    |
| Depolar (P) -- | 0.5178    | 0.6453    | 0.6855    |
| Depolar (U) -- | 0.6823    | 0.7844    | 0.8134    |
| Dip. str. --   | 45.0753   | 11.2780   | 18.4600   |
| Rot. str. --   | 16.6264   | 9.3203    | -11.5973  |
|                | 36        | 35        | 34        |
|                | A         | A         | A         |
| Frequencies -- | 1273.0781 | 1292.9944 | 1303.0487 |
| Red. masses -- | 1.4383    | 1.9294    | 1.5388    |
| Frc consts --  | 1.3735    | 1.9005    | 1.5394    |

Supplementary Material (ESI) for *PCCP*

This journal is © the Owner Societies 2009

|             |    |           |           |           |
|-------------|----|-----------|-----------|-----------|
| IR Inten    | -- | 3.5952    | 5.6732    | 0.9513    |
| Raman Activ | -- | 8.8525    | 2.2813    | 7.2348    |
| Depolar (P) | -- | 0.5921    | 0.6432    | 0.5261    |
| Depolar (U) | -- | 0.7438    | 0.7829    | 0.6895    |
| Dip. str.   | -- | 11.2662   | 17.5040   | 2.9126    |
| Rot. str.   | -- | 11.7808   | -0.2001   | -3.3258   |
|             |    | 33        | 32        | 31        |
|             |    | A         | A         | A         |
| Frequencies | -- | 1316.9964 | 1326.2382 | 1369.3983 |
| Red. masses | -- | 1.3639    | 1.3350    | 1.4045    |
| Frc const   | -- | 1.3938    | 1.3835    | 1.5518    |
| IR Inten    | -- | 4.0434    | 1.7626    | 1.9646    |
| Raman Activ | -- | 11.8233   | 2.5089    | 8.2469    |
| Depolar (P) | -- | 0.6581    | 0.2609    | 0.4466    |
| Depolar (U) | -- | 0.7938    | 0.4139    | 0.6174    |
| Dip. str.   | -- | 12.2480   | 5.3021    | 5.7234    |
| Rot. str.   | -- | -23.3030  | 11.8301   | -3.2157   |
|             |    | 30        | 29        | 28        |
|             |    | A         | A         | A         |
| Frequencies | -- | 1374.1427 | 1386.0412 | 1396.1178 |
| Red. masses | -- | 1.6508    | 1.4780    | 1.3787    |
| Frc const   | -- | 1.8365    | 1.6729    | 1.5833    |
| IR Inten    | -- | 0.3062    | 2.6369    | 3.9568    |
| Raman Activ | -- | 5.7434    | 5.5269    | 1.9485    |
| Depolar (P) | -- | 0.6807    | 0.7495    | 0.4825    |
| Depolar (U) | -- | 0.8100    | 0.8568    | 0.6509    |
| Dip. str.   | -- | 0.8889    | 7.5896    | 11.3066   |
| Rot. str.   | -- | -8.8671   | 5.1831    | 6.5582    |
|             |    | 27        | 26        | 25        |
|             |    | A         | A         | A         |
| Frequencies | -- | 1398.2577 | 1430.5348 | 1443.4059 |
| Red. masses | -- | 1.4053    | 1.1817    | 1.2091    |
| Frc const   | -- | 1.6188    | 1.4248    | 1.4842    |
| IR Inten    | -- | 9.7945    | 0.3053    | 2.7903    |
| Raman Activ | -- | 6.8485    | 22.0980   | 21.8712   |
| Depolar (P) | -- | 0.7492    | 0.4583    | 0.6992    |
| Depolar (U) | -- | 0.8566    | 0.6285    | 0.8230    |
| Dip. str.   | -- | 27.9450   | 0.8515    | 7.7119    |
| Rot. str.   | -- | -9.8596   | 1.8564    | -2.6714   |
|             |    | 24        | 23        | 22        |
|             |    | A         | A         | A         |
| Frequencies | -- | 1448.9371 | 1451.0447 | 1452.7049 |
| Red. masses | -- | 1.0788    | 1.1106    | 1.0511    |
| Frc const   | -- | 1.3344    | 1.3778    | 1.3069    |
| IR Inten    | -- | 5.4484    | 2.6810    | 4.9765    |
| Raman Activ | -- | 18.0904   | 2.1366    | 6.1447    |
| Depolar (P) | -- | 0.7327    | 0.6928    | 0.7454    |
| Depolar (U) | -- | 0.8458    | 0.8185    | 0.8541    |
| Dip. str.   | -- | 15.0011   | 7.3711    | 13.6664   |
| Rot. str.   | -- | 3.4025    | -1.2118   | 13.7567   |
|             |    | 21        | 20        | 19        |
|             |    | A         | A         | A         |
| Frequencies | -- | 1461.9776 | 1467.3134 | 1471.7791 |
| Red. masses | -- | 1.0663    | 1.0707    | 1.0927    |
| Frc const   | -- | 1.3428    | 1.3582    | 1.3945    |
| IR Inten    | -- | 6.3357    | 9.7972    | 2.6343    |
| Raman Activ | -- | 14.2923   | 3.7927    | 6.9112    |
| Depolar (P) | -- | 0.7493    | 0.6417    | 0.7381    |
| Depolar (U) | -- | 0.8567    | 0.7817    | 0.8493    |
| Dip. str.   | -- | 17.2887   | 26.6371   | 7.1406    |
| Rot. str.   | -- | 7.0132    | 7.5517    | 0.5205    |
|             |    | 18        | 17        | 16        |
|             |    | A         | A         | A         |
| Frequencies | -- | 1494.4407 | 1714.8916 | 3013.5385 |
| Red. masses | -- | 2.5587    | 5.5637    | 1.0628    |
| Frc const   | -- | 3.3669    | 9.6402    | 5.6866    |
| IR Inten    | -- | 7.8232    | 19.3710   | 11.7725   |
| Raman Activ | -- | 2.1921    | 28.8451   | 29.1780   |
| Depolar (P) | -- | 0.0916    | 0.1656    | 0.4228    |
| Depolar (U) | -- | 0.1678    | 0.2841    | 0.5944    |
| Dip. str.   | -- | 20.8841   | 45.0633   | 15.5847   |
| Rot. str.   | -- | -7.0750   | 1.6262    | 7.3674    |
|             |    | 15        | 14        | 13        |
|             |    | A         | A         | A         |
| Frequencies | -- | 3016.9463 | 3023.1660 | 3024.3821 |
| Red. masses | -- | 1.0568    | 1.0500    | 1.0440    |
| Frc const   | -- | 5.6676    | 5.6540    | 5.6262    |
| IR Inten    | -- | 15.5272   | 13.5262   | 31.6043   |
| Raman Activ | -- | 42.8282   | 34.4625   | 148.4952  |
| Depolar (P) | -- | 0.7414    | 0.0654    | 0.0621    |
| Depolar (U) | -- | 0.8515    | 0.1228    | 0.1169    |
| Dip. str.   | -- | 20.5321   | 17.8492   | 41.6885   |
| Rot. str.   | -- | -24.3921  | -16.5070  | -1.7231   |
|             |    | 12        | 11        | 10        |
|             |    | A         | A         | A         |
| Frequencies | -- | 3027.9236 | 3045.5211 | 3060.3816 |
| Red. masses | -- | 1.0498    | 1.0853    | 1.0976    |
| Frc const   | -- | 5.6707    | 5.9311    | 6.0570    |
| IR Inten    | -- | 41.8896   | 3.7831    | 49.0529   |
| Raman Activ | -- | 276.5289  | 49.3444   | 17.8511   |
| Depolar (P) | -- | 0.0392    | 0.7461    | 0.6520    |
| Depolar (U) | -- | 0.0754    | 0.8546    | 0.7894    |
| Dip. str.   | -- | 55.1910   | 4.9556    | 63.9434   |
| Rot. str.   | -- | 15.7159   | 7.0544    | 26.6345   |
|             |    | 9         | 8         | 7         |
|             |    | A         | A         | A         |
| Frequencies | -- | 3064.4091 | 3073.9345 | 3075.7331 |
| Red. masses | -- | 1.0988    | 1.1018    | 1.0994    |
| Frc const   | -- | 6.0794    | 6.1341    | 6.1280    |
| IR Inten    | -- | 7.6735    | 39.6888   | 12.3498   |
| Raman Activ | -- | 125.4564  | 47.4916   | 92.4431   |
| Depolar (P) | -- | 0.3342    | 0.3591    | 0.7495    |
| Depolar (U) | -- | 0.5010    | 0.5285    | 0.8568    |
| Dip. str.   | -- | 9.9898    | 51.5087   | 16.0184   |
| Rot. str.   | -- | 17.0255   | -60.2276  | 37.5069   |
|             |    | 6         | 5         | 4         |
|             |    | A         | A         | A         |

## Supplementary Material (ESI) for PCCP

This journal is © the Owner Societies 2009

|             |    |           |           |           |
|-------------|----|-----------|-----------|-----------|
| Frequencies | -- | 3077.3040 | 3092.3174 | 3115.3118 |
| Red. masses | -- | 1.0890    | 1.1010    | 1.1002    |
| Frc consts  | -- | 6.0763    | 6.2029    | 6.2912    |
| IR Inten    | -- | 58.4609   | 24.4030   | 23.1267   |
| Raman Activ | -- | 143.6895  | 83.9913   | 73.1280   |
| Depolar (P) | -- | 0.1797    | 0.7498    | 0.6915    |
| Depolar (U) | -- | 0.3047    | 0.8570    | 0.8176    |
| Dip. str.   | -- | 75.7884   | 31.4823   | 29.6155   |
| Rot. str.   | -- | -5.2053   | 18.2627   | 6.5112    |
|             |    | 3         | 2         | 1         |
|             |    | A         | A         | A         |
| Frequencies | -- | 3121.2007 | 3130.0114 | 3220.3004 |
| Red. masses | -- | 1.1016    | 1.0608    | 1.1157    |
| Frc consts  | -- | 6.3229    | 6.1229    | 6.8171    |
| IR Inten    | -- | 20.0228   | 10.3560   | 19.1961   |
| Raman Activ | -- | 78.4216   | 145.8674  | 89.9499   |
| Depolar (P) | -- | 0.7028    | 0.1319    | 0.7265    |
| Depolar (U) | -- | 0.8255    | 0.2330    | 0.8416    |
| Dip. str.   | -- | 25.5924   | 13.1994   | 23.7807   |
| Rot. str.   | -- | -7.2698   | -8.9164   | -15.3010  |

## S-(-)-Limonene Oxide, eq-c255 (2.5 kJ/mol)

Harmonic frequencies (cm<sup>-1</sup>), IR intensities (KM/Mole), Raman scattering activities (A<sup>4</sup>/AMU), depolarization ratios for plane and unpolarized incident light, reduced masses (AMU), force constants (mDyne/A), Dipole strengths (10<sup>-40</sup> esu<sup>2</sup>-cm<sup>2</sup>), Rotational strengths (10<sup>-44</sup> esu<sup>2</sup>-cm<sup>2</sup>), and normal coordinates:

|             |    |          |          |          |
|-------------|----|----------|----------|----------|
|             |    | 75       | 74       | 73       |
|             |    | A        | A        | A        |
| Frequencies | -- | 44.0444  | 79.7881  | 153.0002 |
| Red. masses | -- | 2.6118   | 3.2551   | 1.9599   |
| Frc consts  | -- | 0.0030   | 0.0122   | 0.0270   |
| IR Inten    | -- | 0.6377   | 1.3461   | 0.3610   |
| Raman Activ | -- | 3.1793   | 0.5401   | 0.2184   |
| Depolar (P) | -- | 0.7486   | 0.7393   | 0.7498   |
| Depolar (U) | -- | 0.8562   | 0.8501   | 0.8570   |
| Dip. str.   | -- | 57.7652  | 67.3055  | 9.4135   |
| Rot. str.   | -- | -3.3761  | 1.2514   | -3.4471  |
|             |    | 72       | 71       | 70       |
|             |    | A        | A        | A        |
| Frequencies | -- | 180.2275 | 188.6678 | 205.7677 |
| Red. masses | -- | 1.2725   | 2.3382   | 1.2887   |
| Frc consts  | -- | 0.0244   | 0.0490   | 0.0321   |
| IR Inten    | -- | 0.3677   | 0.1125   | 0.2586   |
| Raman Activ | -- | 0.5209   | 0.6180   | 0.5713   |
| Depolar (P) | -- | 0.7074   | 0.7494   | 0.6608   |
| Depolar (U) | -- | 0.8287   | 0.8567   | 0.7957   |
| Dip. str.   | -- | 8.1397   | 2.3782   | 5.0130   |
| Rot. str.   | -- | -1.5560  | -0.9988  | -5.9437  |
|             |    | 69       | 68       | 67       |
|             |    | A        | A        | A        |
| Frequencies | -- | 246.3549 | 283.3702 | 318.1781 |
| Red. masses | -- | 1.8744   | 4.1338   | 2.4571   |
| Frc consts  | -- | 0.0670   | 0.1956   | 0.1466   |
| IR Inten    | -- | 0.4821   | 0.5187   | 0.1696   |
| Raman Activ | -- | 0.6757   | 3.5178   | 0.7488   |
| Depolar (P) | -- | 0.7097   | 0.2862   | 0.7386   |
| Depolar (U) | -- | 0.8302   | 0.4450   | 0.8497   |
| Dip. str.   | -- | 7.8077   | 7.3020   | 2.1260   |
| Rot. str.   | -- | 3.7496   | -0.2223  | 0.2768   |
|             |    | 66       | 65       | 64       |
|             |    | A        | A        | A        |
| Frequencies | -- | 342.1417 | 406.5826 | 419.5885 |
| Red. masses | -- | 2.2576   | 2.8495   | 2.6437   |
| Frc consts  | -- | 0.1557   | 0.2775   | 0.2742   |
| IR Inten    | -- | 1.4545   | 7.3353   | 5.4873   |
| Raman Activ | -- | 0.8884   | 0.7562   | 0.7887   |
| Depolar (P) | -- | 0.7439   | 0.5976   | 0.5840   |
| Depolar (U) | -- | 0.8532   | 0.7482   | 0.7374   |
| Dip. str.   | -- | 16.9590  | 71.9741  | 52.1725  |
| Rot. str.   | -- | 4.0934   | 6.2085   | 5.9365   |
|             |    | 63       | 62       | 61       |
|             |    | A        | A        | A        |
| Frequencies | -- | 444.0683 | 497.5394 | 546.7137 |
| Red. masses | -- | 2.4608   | 2.5234   | 2.2498   |
| Frc consts  | -- | 0.2859   | 0.3680   | 0.3962   |
| IR Inten    | -- | 0.3357   | 1.0489   | 4.8405   |
| Raman Activ | -- | 0.7702   | 2.3883   | 3.2031   |
| Depolar (P) | -- | 0.6157   | 0.3677   | 0.3495   |
| Depolar (U) | -- | 0.7621   | 0.5377   | 0.5180   |
| Dip. str.   | -- | 3.0155   | 8.4102   | 35.3212  |
| Rot. str.   | -- | -0.5969  | -2.2627  | -2.7824  |
|             |    | 60       | 59       | 58       |
|             |    | A        | A        | A        |
| Frequencies | -- | 555.9719 | 638.5362 | 693.7841 |
| Red. masses | -- | 3.5398   | 3.7213   | 4.1144   |
| Frc consts  | -- | 0.6447   | 0.8940   | 1.1668   |
| IR Inten    | -- | 6.9627   | 0.3744   | 5.0691   |
| Raman Activ | -- | 1.6122   | 1.3448   | 13.0352  |
| Depolar (P) | -- | 0.5157   | 0.7199   | 0.1714   |
| Depolar (U) | -- | 0.6805   | 0.8372   | 0.2927   |
| Dip. str.   | -- | 49.9609  | 2.3389   | 29.1484  |
| Rot. str.   | -- | 12.3883  | -0.1470  | -5.7963  |
|             |    | 57       | 56       | 55       |
|             |    | A        | A        | A        |
| Frequencies | -- | 713.7045 | 776.6650 | 810.6753 |
| Red. masses | -- | 1.1723   | 3.1936   | 1.6121   |
| Frc consts  | -- | 0.3518   | 1.1350   | 0.6242   |
| IR Inten    | -- | 0.3161   | 13.5013  | 2.1590   |
| Raman Activ | -- | 6.8667   | 6.5301   | 1.8697   |
| Depolar (P) | -- | 0.3766   | 0.4295   | 0.1931   |
| Depolar (U) | -- | 0.5471   | 0.6009   | 0.3236   |

Supplementary Material (ESI) for *PCCP*

This journal is © the Owner Societies 2009

|             |    |           |           |           |
|-------------|----|-----------|-----------|-----------|
| Dip. str.   | -- | 1.7670    | 69.3502   | 10.6246   |
| Rot. str.   | -- | -11.1810  | -6.6003   | -17.6916  |
|             |    | 54        | 53        | 52        |
|             |    | A         | A         | A         |
| Frequencies | -- | 864.7297  | 897.3879  | 915.3217  |
| Red. masses | -- | 2.3802    | 2.2511    | 1.6871    |
| Frc const   | -- | 1.0486    | 1.0681    | 0.8328    |
| IR Inten    | -- | 9.8741    | 1.5735    | 14.8223   |
| Raman Activ | -- | 5.6427    | 1.3981    | 2.4214    |
| Depolar (P) | -- | 0.2276    | 0.5339    | 0.2478    |
| Depolar (U) | -- | 0.3708    | 0.6961    | 0.3971    |
| Dip. str.   | -- | 45.5539   | 6.9952    | 64.6025   |
| Rot. str.   | -- | -20.0523  | 3.3191    | 18.7729   |
|             |    | 51        | 50        | 49        |
|             |    | A         | A         | A         |
| Frequencies | -- | 920.1593  | 934.8356  | 965.6176  |
| Red. masses | -- | 1.6783    | 1.7924    | 2.0681    |
| Frc const   | -- | 0.8372    | 0.9229    | 1.1361    |
| IR Inten    | -- | 19.5547   | 1.2530    | 5.6214    |
| Raman Activ | -- | 1.8241    | 1.6082    | 1.2713    |
| Depolar (P) | -- | 0.1522    | 0.7422    | 0.6530    |
| Depolar (U) | -- | 0.2643    | 0.8520    | 0.7901    |
| Dip. str.   | -- | 84.7802   | 5.3471    | 23.2247   |
| Rot. str.   | -- | -30.9814  | -10.5235  | 3.5379    |
|             |    | 48        | 47        | 46        |
|             |    | A         | A         | A         |
| Frequencies | -- | 989.4677  | 1008.1970 | 1033.4960 |
| Red. masses | -- | 1.7705    | 1.6810    | 1.4905    |
| Frc const   | -- | 1.0213    | 1.0067    | 0.9380    |
| IR Inten    | -- | 3.6430    | 0.3308    | 4.0870    |
| Raman Activ | -- | 2.2563    | 1.7323    | 3.0725    |
| Depolar (P) | -- | 0.4408    | 0.7500    | 0.3917    |
| Depolar (U) | -- | 0.6119    | 0.8571    | 0.5629    |
| Dip. str.   | -- | 14.6879   | 1.3091    | 15.7763   |
| Rot. str.   | -- | -11.6769  | -9.1901   | 27.6795   |
|             |    | 45        | 44        | 43        |
|             |    | A         | A         | A         |
| Frequencies | -- | 1049.8516 | 1051.3728 | 1061.8857 |
| Red. masses | -- | 1.6461    | 1.5604    | 1.4503    |
| Frc const   | -- | 1.0689    | 1.0162    | 0.9635    |
| IR Inten    | -- | 0.9545    | 6.0860    | 2.6045    |
| Raman Activ | -- | 1.4306    | 2.7344    | 10.3332   |
| Depolar (P) | -- | 0.5762    | 0.6891    | 0.7270    |
| Depolar (U) | -- | 0.7312    | 0.8159    | 0.8419    |
| Dip. str.   | -- | 3.6271    | 23.0932   | 9.7850    |
| Rot. str.   | -- | 4.0611    | 2.5532    | 6.7053    |
|             |    | 42        | 41        | 40        |
|             |    | A         | A         | A         |
| Frequencies | -- | 1070.6803 | 1121.5541 | 1133.4263 |
| Red. masses | -- | 2.0307    | 2.2941    | 2.3141    |
| Frc const   | -- | 1.3715    | 1.7002    | 1.7515    |
| IR Inten    | -- | 5.6218    | 2.4219    | 10.5028   |
| Raman Activ | -- | 3.6062    | 1.3581    | 3.1119    |
| Depolar (P) | -- | 0.6510    | 0.7278    | 0.4052    |
| Depolar (U) | -- | 0.7886    | 0.8424    | 0.5767    |
| Dip. str.   | -- | 20.9472   | 8.6148    | 36.9674   |
| Rot. str.   | -- | 26.3766   | 0.5199    | 5.5769    |
|             |    | 39        | 38        | 37        |
|             |    | A         | A         | A         |
| Frequencies | -- | 1196.3524 | 1211.1076 | 1233.9971 |
| Red. masses | -- | 1.4414    | 1.4375    | 1.6924    |
| Frc const   | -- | 1.2155    | 1.2423    | 1.5184    |
| IR Inten    | -- | 7.5025    | 0.6571    | 14.8907   |
| Raman Activ | -- | 3.5014    | 1.7318    | 2.3633    |
| Depolar (P) | -- | 0.2763    | 0.4554    | 0.7495    |
| Depolar (U) | -- | 0.4330    | 0.6258    | 0.8568    |
| Dip. str.   | -- | 25.0180   | 2.1646    | 48.1402   |
| Rot. str.   | -- | 27.4752   | -3.2272   | -15.4317  |
|             |    | 36        | 35        | 34        |
|             |    | A         | A         | A         |
| Frequencies | -- | 1269.7040 | 1276.0041 | 1305.7210 |
| Red. masses | -- | 1.5570    | 1.5000    | 1.4675    |
| Frc const   | -- | 1.4789    | 1.4389    | 1.4741    |
| IR Inten    | -- | 3.6591    | 2.9934    | 6.6912    |
| Raman Activ | -- | 3.7875    | 4.3710    | 5.6223    |
| Depolar (P) | -- | 0.5912    | 0.6440    | 0.6284    |
| Depolar (U) | -- | 0.7431    | 0.7835    | 0.7718    |
| Dip. str.   | -- | 11.4968   | 9.3587    | 20.4438   |
| Rot. str.   | -- | 2.5995    | 7.4121    | 21.9542   |
|             |    | 33        | 32        | 31        |
|             |    | A         | A         | A         |
| Frequencies | -- | 1315.0955 | 1337.8556 | 1360.4915 |
| Red. masses | -- | 1.3226    | 1.4158    | 1.5114    |
| Frc const   | -- | 1.3476    | 1.4930    | 1.6482    |
| IR Inten    | -- | 2.8477    | 0.6926    | 1.0226    |
| Raman Activ | -- | 11.9623   | 2.4061    | 4.1182    |
| Depolar (P) | -- | 0.6135    | 0.7475    | 0.5046    |
| Depolar (U) | -- | 0.7605    | 0.8555    | 0.6707    |
| Dip. str.   | -- | 8.6387    | 2.0653    | 2.9986    |
| Rot. str.   | -- | -22.0110  | 7.9879    | 9.5114    |
|             |    | 30        | 29        | 28        |
|             |    | A         | A         | A         |
| Frequencies | -- | 1377.1460 | 1393.7047 | 1396.8416 |
| Red. masses | -- | 1.6873    | 1.2715    | 1.3906    |
| Frc const   | -- | 1.8854    | 1.4551    | 1.5987    |
| IR Inten    | -- | 1.6820    | 3.2581    | 7.4320    |
| Raman Activ | -- | 2.5427    | 5.3607    | 3.5829    |
| Depolar (P) | -- | 0.4503    | 0.6058    | 0.6715    |
| Depolar (U) | -- | 0.6209    | 0.7545    | 0.8035    |
| Dip. str.   | -- | 4.8725    | 9.3260    | 21.2260   |
| Rot. str.   | -- | -14.5021  | -5.9035   | 6.4335    |
|             |    | 27        | 26        | 25        |
|             |    | A         | A         | A         |
| Frequencies | -- | 1406.6020 | 1428.8761 | 1443.6449 |
| Red. masses | -- | 1.6743    | 1.1770    | 1.2170    |
| Frc const   | -- | 1.9517    | 1.4159    | 1.4943    |
| IR Inten    | -- | 1.7135    | 0.3733    | 3.9906    |

Supplementary Material (ESI) for PCCP

This journal is © the Owner Societies 2009

|             |    |           |           |           |
|-------------|----|-----------|-----------|-----------|
| Raman Activ | -- | 5.4880    | 32.7858   | 15.4267   |
| Depolar (P) | -- | 0.5926    | 0.5950    | 0.6180    |
| Depolar (U) | -- | 0.7442    | 0.7461    | 0.7639    |
| Dip. str.   | -- | 4.8599    | 1.0423    | 11.0276   |
| Rot. str.   | -- | -6.1103   | 0.3662    | -4.8185   |
|             |    | 24        | 23        | 22        |
|             |    | A         | A         | A         |
| Frequencies | -- | 1448.6018 | 1451.0010 | 1451.4133 |
| Red. masses | -- | 1.0785    | 1.0711    | 1.0825    |
| Frc consts  | -- | 1.3334    | 1.3286    | 1.3436    |
| IR Inten    | -- | 0.9730    | 4.2371    | 5.7335    |
| Raman Activ | -- | 5.3600    | 11.1335   | 8.6789    |
| Depolar (P) | -- | 0.7469    | 0.7500    | 0.7462    |
| Depolar (U) | -- | 0.8551    | 0.8571    | 0.8547    |
| Dip. str.   | -- | 2.6796    | 11.6495   | 15.7593   |
| Rot. str.   | -- | 1.2183    | 0.7934    | 2.1473    |
|             |    | 21        | 20        | 19        |
|             |    | A         | A         | A         |
| Frequencies | -- | 1462.0327 | 1466.4739 | 1474.1436 |
| Red. masses | -- | 1.0649    | 1.0689    | 1.0968    |
| Frc consts  | -- | 1.3411    | 1.3543    | 1.4043    |
| IR Inten    | -- | 6.4440    | 15.8947   | 0.9981    |
| Raman Activ | -- | 13.6765   | 5.4835    | 4.4709    |
| Depolar (P) | -- | 0.7497    | 0.6872    | 0.7293    |
| Depolar (U) | -- | 0.8570    | 0.8146    | 0.8434    |
| Dip. str.   | -- | 17.5836   | 43.2399   | 2.7011    |
| Rot. str.   | -- | 7.4355    | -3.4367   | 0.0526    |
|             |    | 18        | 17        | 16        |
|             |    | A         | A         | A         |
| Frequencies | -- | 1496.0552 | 1716.2350 | 3007.9528 |
| Red. masses | -- | 2.6169    | 5.4499    | 1.0755    |
| Frc consts  | -- | 3.4509    | 9.4578    | 5.7333    |
| IR Inten    | -- | 10.0949   | 20.6702   | 1.6839    |
| Raman Activ | -- | 2.0841    | 22.6868   | 86.3627   |
| Depolar (P) | -- | 0.0887    | 0.1312    | 0.2572    |
| Depolar (U) | -- | 0.1630    | 0.2319    | 0.4092    |
| Dip. str.   | -- | 26.9193   | 48.0480   | 2.2334    |
| Rot. str.   | -- | -8.0477   | 7.2440    | 0.2476    |
|             |    | 15        | 14        | 13        |
|             |    | A         | A         | A         |
| Frequencies | -- | 3015.1157 | 3018.7319 | 3022.3784 |
| Red. masses | -- | 1.0589    | 1.0461    | 1.0662    |
| Frc consts  | -- | 5.6718    | 5.6164    | 5.7383    |
| IR Inten    | -- | 2.8183    | 31.0121   | 40.5401   |
| Raman Activ | -- | 30.9824   | 176.2870  | 21.3731   |
| Depolar (P) | -- | 0.2224    | 0.0331    | 0.0729    |
| Depolar (U) | -- | 0.3639    | 0.0642    | 0.1359    |
| Dip. str.   | -- | 3.7290    | 40.9839   | 53.5110   |
| Rot. str.   | -- | 13.2933   | -33.2878  | 6.4051    |
|             |    | 12        | 11        | 10        |
|             |    | A         | A         | A         |
| Frequencies | -- | 3023.1729 | 3027.8515 | 3062.1465 |
| Red. masses | -- | 1.0530    | 1.0475    | 1.1010    |
| Frc consts  | -- | 5.6702    | 5.6584    | 6.0826    |
| IR Inten    | -- | 4.8387    | 42.1691   | 30.2779   |
| Raman Activ | -- | 16.0279   | 242.9506  | 57.0751   |
| Depolar (P) | -- | 0.6940    | 0.0369    | 0.5877    |
| Depolar (U) | -- | 0.8194    | 0.0712    | 0.7403    |
| Dip. str.   | -- | 6.3852    | 55.5606   | 39.4463   |
| Rot. str.   | -- | -17.0422  | 34.5895   | -18.8704  |
|             |    | 9         | 8         | 7         |
|             |    | A         | A         | A         |
| Frequencies | -- | 3065.9975 | 3071.8283 | 3077.0676 |
| Red. masses | -- | 1.0972    | 1.0981    | 1.1008    |
| Frc consts  | -- | 6.0770    | 6.1049    | 6.1411    |
| IR Inten    | -- | 26.1005   | 16.3901   | 25.9635   |
| Raman Activ | -- | 80.8819   | 82.0098   | 96.4606   |
| Depolar (P) | -- | 0.4023    | 0.7317    | 0.3959    |
| Depolar (U) | -- | 0.5738    | 0.8451    | 0.5672    |
| Dip. str.   | -- | 33.9613   | 21.2858   | 33.6615   |
| Rot. str.   | -- | 47.2392   | 16.3938   | -29.0539  |
|             |    | 6         | 5         | 4         |
|             |    | A         | A         | A         |
| Frequencies | -- | 3077.4192 | 3092.6324 | 3115.3790 |
| Red. masses | -- | 1.0893    | 1.1010    | 1.1006    |
| Frc consts  | -- | 6.0782    | 6.2041    | 6.2934    |
| IR Inten    | -- | 63.5530   | 23.9894   | 23.8293   |
| Raman Activ | -- | 145.9626  | 83.2318   | 75.2909   |
| Depolar (P) | -- | 0.1571    | 0.7500    | 0.6866    |
| Depolar (U) | -- | 0.2716    | 0.8571    | 0.8142    |
| Dip. str.   | -- | 82.3866   | 30.9456   | 30.5146   |
| Rot. str.   | -- | -13.5700  | 18.5325   | -7.7055   |
|             |    | 3         | 2         | 1         |
|             |    | A         | A         | A         |
| Frequencies | -- | 3121.2771 | 3142.6576 | 3231.3042 |
| Red. masses | -- | 1.1016    | 1.0615    | 1.1141    |
| Frc consts  | -- | 6.3234    | 6.1767    | 6.8538    |
| IR Inten    | -- | 19.8511   | 9.1393    | 17.1848   |
| Raman Activ | -- | 77.6642   | 145.3030  | 67.4799   |
| Depolar (P) | -- | 0.7003    | 0.1530    | 0.7478    |
| Depolar (U) | -- | 0.8238    | 0.2654    | 0.8557    |
| Dip. str.   | -- | 25.3723   | 11.6017   | 21.2165   |
| Rot. str.   | -- | -7.3700   | 0.0917    | 7.1990    |

S-(-)-Limonene Oxide, eq-c305 (2.8 kJ/mol)

Harmonic frequencies (cm<sup>-1</sup>), IR intensities (KM/Mole), Raman scattering activities (A<sup>4</sup>/AMU), depolarization ratios for plane and unpolarized incident light, reduced masses (AMU), force constants (mDyne/A), Dipole strengths (10<sup>-40</sup> esu<sup>2</sup>-cm<sup>2</sup>), Rotational strengths (10<sup>-44</sup> esu<sup>2</sup>-cm<sup>2</sup>),



and normal coordinates:

|                |          |           |           |
|----------------|----------|-----------|-----------|
|                | 75       | 74        | 73        |
|                | A        | A         | A         |
| Frequencies -- | 34.8221  | 77.0407   | 144.4515  |
| Red. masses -- | 2.5736   | 3.2880    | 2.0892    |
| Frc consts --  | 0.0018   | 0.0115    | 0.0257    |
| IR Inten --    | 0.7523   | 4.5311    | 0.3887    |
| Raman Activ -- | 3.2264   | 0.4152    | 0.1629    |
| Depolar (P) -- | 0.7488   | 0.7341    | 0.7463    |
| Depolar (U) -- | 0.8563   | 0.8467    | 0.8547    |
| Dip. str. --   | 86.1858  | 234.6325  | 10.7361   |
| Rot. str. --   | 5.0190   | 3.3025    | -5.2066   |
|                | 72       | 71        | 70        |
|                | A        | A         | A         |
| Frequencies -- | 169.0916 | 187.8337  | 209.9540  |
| Red. masses -- | 1.4317   | 1.5458    | 1.4547    |
| Frc consts --  | 0.0241   | 0.0321    | 0.0378    |
| IR Inten --    | 0.6017   | 0.7206    | 1.1468    |
| Raman Activ -- | 0.3874   | 0.8916    | 0.2605    |
| Depolar (P) -- | 0.7322   | 0.7432    | 0.6508    |
| Depolar (U) -- | 0.8454   | 0.8527    | 0.7885    |
| Dip. str. --   | 14.1964  | 15.3053   | 21.7901   |
| Rot. str. --   | -5.7976  | 16.5871   | -4.8466   |
|                | 69       | 68        | 67        |
|                | A        | A         | A         |
| Frequencies -- | 243.1210 | 289.8564  | 322.3930  |
| Red. masses -- | 1.9827   | 4.1261    | 2.5023    |
| Frc consts --  | 0.0690   | 0.2042    | 0.1532    |
| IR Inten --    | 0.7441   | 0.7262    | 0.6940    |
| Raman Activ -- | 0.2004   | 3.7498    | 0.2973    |
| Depolar (P) -- | 0.3410   | 0.2772    | 0.7486    |
| Depolar (U) -- | 0.5085   | 0.4341    | 0.8562    |
| Dip. str. --   | 12.2094  | 9.9944    | 8.5879    |
| Rot. str. --   | 1.4321   | 3.5908    | -1.7168   |
|                | 66       | 65        | 64        |
|                | A        | A         | A         |
| Frequencies -- | 331.8996 | 398.3074  | 411.7830  |
| Red. masses -- | 2.1610   | 3.5216    | 2.2560    |
| Frc consts --  | 0.1403   | 0.3292    | 0.2254    |
| IR Inten --    | 0.8764   | 9.6142    | 4.2177    |
| Raman Activ -- | 1.4367   | 1.1696    | 0.1916    |
| Depolar (P) -- | 0.7464   | 0.7475    | 0.7484    |
| Depolar (U) -- | 0.8548   | 0.8555    | 0.8561    |
| Dip. str. --   | 10.5338  | 96.2950   | 40.8617   |
| Rot. str. --   | -1.2798  | 4.0187    | 0.2433    |
|                | 63       | 62        | 61        |
|                | A        | A         | A         |
| Frequencies -- | 451.5144 | 502.0443  | 528.1824  |
| Red. masses -- | 2.4230   | 2.4939    | 2.4068    |
| Frc consts --  | 0.2910   | 0.3703    | 0.3956    |
| IR Inten --    | 0.1351   | 3.3572    | 7.8781    |
| Raman Activ -- | 1.2052   | 2.0683    | 3.2919    |
| Depolar (P) -- | 0.7001   | 0.4636    | 0.4253    |
| Depolar (U) -- | 0.8236   | 0.6335    | 0.5968    |
| Dip. str. --   | 1.1940   | 26.6773   | 59.5036   |
| Rot. str. --   | 1.2852   | 1.4021    | -3.3077   |
|                | 60       | 59        | 58        |
|                | A        | A         | A         |
| Frequencies -- | 569.7985 | 637.5537  | 690.0071  |
| Red. masses -- | 3.0498   | 3.7440    | 3.1321    |
| Frc consts --  | 0.5834   | 0.8966    | 0.8786    |
| IR Inten --    | 4.9837   | 0.8796    | 5.7309    |
| Raman Activ -- | 1.6206   | 1.4852    | 13.3992   |
| Depolar (P) -- | 0.3228   | 0.6943    | 0.1341    |
| Depolar (U) -- | 0.4880   | 0.8196    | 0.2365    |
| Dip. str. --   | 34.8928  | 5.5041    | 33.1344   |
| Rot. str. --   | 14.2340  | -0.7846   | 28.4214   |
|                | 57       | 56        | 55        |
|                | A        | A         | A         |
| Frequencies -- | 700.1869 | 775.1929  | 802.9622  |
| Red. masses -- | 1.2619   | 3.7540    | 1.6081    |
| Frc consts --  | 0.3645   | 1.3291    | 0.6109    |
| IR Inten --    | 22.6300  | 14.1817   | 0.2562    |
| Raman Activ -- | 3.5280   | 8.3152    | 3.8614    |
| Depolar (P) -- | 0.7389   | 0.4146    | 0.2442    |
| Depolar (U) -- | 0.8498   | 0.5862    | 0.3925    |
| Dip. str. --   | 128.9372 | 72.9835   | 1.2729    |
| Rot. str. --   | -48.6355 | -16.9325  | -2.8594   |
|                | 54       | 53        | 52        |
|                | A        | A         | A         |
| Frequencies -- | 866.7912 | 901.9200  | 916.5524  |
| Red. masses -- | 2.3943   | 2.3043    | 1.9370    |
| Frc consts --  | 1.0599   | 1.1044    | 0.9587    |
| IR Inten --    | 11.1928  | 3.5253    | 16.7235   |
| Raman Activ -- | 3.8603   | 1.2996    | 3.1227    |
| Depolar (P) -- | 0.1581   | 0.3974    | 0.2167    |
| Depolar (U) -- | 0.2730   | 0.5688    | 0.3563    |
| Dip. str. --   | 51.5147  | 15.5932   | 72.7909   |
| Rot. str. --   | -39.5195 | -10.2549  | 44.9390   |
|                | 51       | 50        | 49        |
|                | A        | A         | A         |
| Frequencies -- | 918.6325 | 933.6437  | 963.2980  |
| Red. masses -- | 1.4451   | 1.7796    | 2.2300    |
| Frc consts --  | 0.7185   | 0.9140    | 1.2192    |
| IR Inten --    | 15.5646  | 2.7323    | 3.8162    |
| Raman Activ -- | 1.2040   | 1.7828    | 2.1448    |
| Depolar (P) -- | 0.3216   | 0.6873    | 0.7358    |
| Depolar (U) -- | 0.4867   | 0.8147    | 0.8478    |
| Dip. str. --   | 67.5932  | 11.6748   | 15.8045   |
| Rot. str. --   | -26.1601 | -4.8935   | -5.7660   |
|                | 48       | 47        | 46        |
|                | A        | A         | A         |
| Frequencies -- | 998.1372 | 1011.8623 | 1029.2501 |
| Red. masses -- | 1.9863   | 1.4360    | 1.6255    |
| Frc consts --  | 1.1659   | 0.8662    | 1.0145    |
| IR Inten --    | 6.2897   | 4.8015    | 2.7869    |
| Raman Activ -- | 1.1761   | 5.2886    | 1.5948    |

Supplementary Material (ESI) for *PCCP*

This journal is © the Owner Societies 2009

|                |           |           |           |
|----------------|-----------|-----------|-----------|
| Depolar (P) -- | 0.1830    | 0.5220    | 0.4733    |
| Depolar (U) -- | 0.3094    | 0.6859    | 0.6425    |
| Dip. str. --   | 25.1388   | 18.9305   | 10.8020   |
| Rot. str. --   | -8.2775   | 5.6469    | -16.1496  |
|                | 45        | 44        | 43        |
|                | A         | A         | A         |
| Frequencies -- | 1048.7011 | 1058.4121 | 1066.9442 |
| Red. masses -- | 1.5921    | 1.5252    | 1.6543    |
| Frc consts --  | 1.0316    | 1.0066    | 1.1095    |
| IR Inten --    | 4.7070    | 4.4116    | 2.7753    |
| Raman Activ -- | 2.5541    | 5.4507    | 3.4172    |
| Depolar (P) -- | 0.7458    | 0.7161    | 0.7140    |
| Depolar (U) -- | 0.8544    | 0.8346    | 0.8332    |
| Dip. str. --   | 17.9061   | 16.6282   | 10.3771   |
| Rot. str. --   | 9.3775    | 4.2400    | 13.1263   |
|                | 42        | 41        | 40        |
|                | A         | A         | A         |
| Frequencies -- | 1083.9695 | 1115.6914 | 1136.1357 |
| Red. masses -- | 1.7672    | 2.3392    | 2.2823    |
| Frc consts --  | 1.2234    | 1.7155    | 1.7358    |
| IR Inten --    | 3.7492    | 0.6935    | 15.1442   |
| Raman Activ -- | 1.5318    | 3.0151    | 3.4156    |
| Depolar (P) -- | 0.5073    | 0.7071    | 0.4837    |
| Depolar (U) -- | 0.6731    | 0.8284    | 0.6520    |
| Dip. str. --   | 13.7985   | 2.4797    | 53.1769   |
| Rot. str. --   | 22.0034   | -8.4243   | 25.9563   |
|                | 39        | 38        | 37        |
|                | A         | A         | A         |
| Frequencies -- | 1199.8243 | 1211.6166 | 1229.1009 |
| Red. masses -- | 1.4634    | 1.4627    | 1.6302    |
| Frc consts --  | 1.2413    | 1.2651    | 1.4510    |
| IR Inten --    | 6.9538    | 2.5441    | 5.2765    |
| Raman Activ -- | 2.9303    | 5.0446    | 0.2822    |
| Depolar (P) -- | 0.4140    | 0.4323    | 0.6706    |
| Depolar (U) -- | 0.5855    | 0.6037    | 0.8028    |
| Dip. str. --   | 23.1213   | 8.3769    | 17.1265   |
| Rot. str. --   | 11.8976   | 0.6111    | -5.6695   |
|                | 36        | 35        | 34        |
|                | A         | A         | A         |
| Frequencies -- | 1260.5529 | 1283.3504 | 1311.1811 |
| Red. masses -- | 1.5862    | 1.3466    | 1.4942    |
| Frc consts --  | 1.4850    | 1.3067    | 1.5135    |
| IR Inten --    | 5.8911    | 0.6443    | 4.9375    |
| Raman Activ -- | 4.0421    | 6.9770    | 10.0269   |
| Depolar (P) -- | 0.5066    | 0.7340    | 0.5682    |
| Depolar (U) -- | 0.6725    | 0.8466    | 0.7247    |
| Dip. str. --   | 18.6441   | 2.0028    | 15.0228   |
| Rot. str. --   | 4.9078    | 3.6039    | -21.3120  |
|                | 33        | 32        | 31        |
|                | A         | A         | A         |
| Frequencies -- | 1318.9562 | 1329.4579 | 1363.0477 |
| Red. masses -- | 1.3882    | 1.4622    | 1.3974    |
| Frc consts --  | 1.4228    | 1.5226    | 1.5296    |
| IR Inten --    | 0.6885    | 2.9372    | 2.7741    |
| Raman Activ -- | 3.8863    | 1.1952    | 7.2226    |
| Depolar (P) -- | 0.7500    | 0.5653    | 0.7488    |
| Depolar (U) -- | 0.8571    | 0.7223    | 0.8564    |
| Dip. str. --   | 2.0826    | 8.8139    | 8.1192    |
| Rot. str. --   | 4.1161    | 1.0327    | -21.4328  |
|                | 30        | 29        | 28        |
|                | A         | A         | A         |
| Frequencies -- | 1379.1726 | 1393.4993 | 1396.4228 |
| Red. masses -- | 1.6757    | 1.3344    | 1.3700    |
| Frc consts --  | 1.8779    | 1.5266    | 1.5740    |
| IR Inten --    | 1.3205    | 7.3709    | 1.2792    |
| Raman Activ -- | 3.1318    | 3.4920    | 4.6851    |
| Depolar (P) -- | 0.3697    | 0.6314    | 0.6086    |
| Depolar (U) -- | 0.5399    | 0.7740    | 0.7567    |
| Dip. str. --   | 3.8196    | 21.1018   | 3.6544    |
| Rot. str. --   | 1.1278    | 4.7213    | -1.9575   |
|                | 27        | 26        | 25        |
|                | A         | A         | A         |
| Frequencies -- | 1406.2290 | 1425.2576 | 1443.0193 |
| Red. masses -- | 1.7841    | 1.1590    | 1.1645    |
| Frc consts --  | 2.0786    | 1.3871    | 1.4287    |
| IR Inten --    | 1.3758    | 7.9114    | 3.6029    |
| Raman Activ -- | 5.2517    | 27.4117   | 16.1526   |
| Depolar (P) -- | 0.5453    | 0.5637    | 0.7100    |
| Depolar (U) -- | 0.7057    | 0.7209    | 0.8304    |
| Dip. str. --   | 3.9029    | 22.1447   | 9.9606    |
| Rot. str. --   | 17.9449   | -7.6041   | 0.5798    |
|                | 24        | 23        | 22        |
|                | A         | A         | A         |
| Frequencies -- | 1449.0633 | 1450.9541 | 1452.6676 |
| Red. masses -- | 1.0948    | 1.1008    | 1.0703    |
| Frc consts --  | 1.3544    | 1.3655    | 1.3307    |
| IR Inten --    | 0.7292    | 9.8070    | 2.8079    |
| Raman Activ -- | 11.8732   | 3.5691    | 5.2949    |
| Depolar (P) -- | 0.7241    | 0.7415    | 0.7266    |
| Depolar (U) -- | 0.8400    | 0.8516    | 0.8416    |
| Dip. str. --   | 2.0075    | 26.9644   | 7.7113    |
| Rot. str. --   | -2.7575   | -2.3570   | 6.2426    |
|                | 21        | 20        | 19        |
|                | A         | A         | A         |
| Frequencies -- | 1460.5946 | 1464.7964 | 1472.0446 |
| Red. masses -- | 1.0661    | 1.0619    | 1.0950    |
| Frc consts --  | 1.3400    | 1.3424    | 1.3980    |
| IR Inten --    | 3.2969    | 17.3822   | 4.7096    |
| Raman Activ -- | 16.6779   | 5.7498    | 9.3571    |
| Depolar (P) -- | 0.7465    | 0.7203    | 0.7447    |
| Depolar (U) -- | 0.8549    | 0.8374    | 0.8536    |
| Dip. str. --   | 9.0050    | 47.3406   | 12.7635   |
| Rot. str. --   | -5.1419   | -2.7111   | 12.0066   |
|                | 18        | 17        | 16        |
|                | A         | A         | A         |
| Frequencies -- | 1496.2223 | 1718.8614 | 3002.5379 |
| Red. masses -- | 2.6187    | 5.2662    | 1.0593    |

Supplementary Material (ESI) for *PCCP*

This journal is © the Owner Societies 2009

|             |    |           |           |           |
|-------------|----|-----------|-----------|-----------|
| Frc consts  | -- | 3.4540    | 9.1671    | 5.6266    |
| IR Inten    | -- | 9.0903    | 18.9833   | 16.2932   |
| Raman Activ | -- | 2.7057    | 22.0925   | 21.5626   |
| Depolar (P) | -- | 0.1167    | 0.1346    | 0.3648    |
| Depolar (U) | -- | 0.2089    | 0.2372    | 0.5346    |
| Dip. str.   | -- | 24.2375   | 44.0594   | 21.6483   |
| Rot. str.   | -- | -20.0607  | -5.7115   | -14.5929  |
|             |    | 15        | 14        | 13        |
|             |    | A         | A         | A         |
| Frequencies | -- | 3016.2065 | 3020.8624 | 3022.0070 |
| Red. masses | -- | 1.0621    | 1.0585    | 1.0544    |
| Frc consts  | -- | 5.6932    | 5.6912    | 5.6736    |
| IR Inten    | -- | 17.7075   | 4.4010    | 15.6473   |
| Raman Activ | -- | 69.3556   | 261.2784  | 11.2365   |
| Depolar (P) | -- | 0.1503    | 0.0590    | 0.6050    |
| Depolar (U) | -- | 0.2614    | 0.1115    | 0.7539    |
| Dip. str.   | -- | 23.4209   | 5.8120    | 20.6562   |
| Rot. str.   | -- | 13.5864   | 3.2516    | -27.8355  |
|             |    | 12        | 11        | 10        |
|             |    | A         | A         | A         |
| Frequencies | -- | 3025.8837 | 3027.9803 | 3062.0639 |
| Red. masses | -- | 1.0571    | 1.0549    | 1.1016    |
| Frc consts  | -- | 5.7025    | 5.6988    | 6.0857    |
| IR Inten    | -- | 48.4018   | 17.0843   | 26.1809   |
| Raman Activ | -- | 112.2839  | 84.5352   | 63.0240   |
| Depolar (P) | -- | 0.0505    | 0.0568    | 0.6851    |
| Depolar (U) | -- | 0.0962    | 0.1076    | 0.8131    |
| Dip. str.   | -- | 63.8141   | 22.5087   | 34.1096   |
| Rot. str.   | -- | 35.0088   | -20.5885  | -6.4931   |
|             |    | 9         | 8         | 7         |
|             |    | A         | A         | A         |
| Frequencies | -- | 3064.5378 | 3073.8224 | 3077.4766 |
| Red. masses | -- | 1.0971    | 1.0974    | 1.0996    |
| Frc consts  | -- | 6.0707    | 6.1092    | 6.1361    |
| IR Inten    | -- | 14.6318   | 29.8737   | 39.7243   |
| Raman Activ | -- | 86.8353   | 89.5915   | 85.1628   |
| Depolar (P) | -- | 0.3392    | 0.7185    | 0.3801    |
| Depolar (U) | -- | 0.5065    | 0.8362    | 0.5508    |
| Dip. str.   | -- | 19.0477   | 38.7719   | 51.4955   |
| Rot. str.   | -- | 46.1238   | 20.5968   | -21.5216  |
|             |    | 6         | 5         | 4         |
|             |    | A         | A         | A         |
| Frequencies | -- | 3079.2345 | 3092.6995 | 3114.4909 |
| Red. masses | -- | 1.0889    | 1.1010    | 1.1010    |
| Frc consts  | -- | 6.0831    | 6.2044    | 6.2921    |
| IR Inten    | -- | 58.5169   | 24.6740   | 29.4855   |
| Raman Activ | -- | 154.7436  | 78.9333   | 81.9964   |
| Depolar (P) | -- | 0.1613    | 0.7496    | 0.6069    |
| Depolar (U) | -- | 0.2778    | 0.8569    | 0.7554    |
| Dip. str.   | -- | 75.8134   | 31.8279   | 37.7684   |
| Rot. str.   | -- | -18.6611  | 12.4921   | 18.2537   |
|             |    | 3         | 2         | 1         |
|             |    | A         | A         | A         |
| Frequencies | -- | 3121.4900 | 3143.1903 | 3231.8354 |
| Red. masses | -- | 1.1014    | 1.0618    | 1.1132    |
| Frc consts  | -- | 6.3231    | 6.1809    | 6.8503    |
| IR Inten    | -- | 17.2436   | 11.5918   | 4.9518    |
| Raman Activ | -- | 73.2986   | 133.9597  | 71.9870   |
| Depolar (P) | -- | 0.7333    | 0.1470    | 0.7379    |
| Depolar (U) | -- | 0.8462    | 0.2563    | 0.8492    |
| Dip. str.   | -- | 22.0380   | 14.7126   | 6.1126    |
| Rot. str.   | -- | -6.9280   | 3.3810    | 5.8319    |

**Table 3S:** Output of the MolVib program for the five most stable equatorial conformers (eq-t110, eq-t255, eq-c110, eq-c255 and eq-c305) of the S-(-)-Limonene oxide

| S-(-)-Limonene Oxide, eq-t110 (0.0 kJ/mol) |        |         |         |         |         |         |         |         |         |  |
|--------------------------------------------|--------|---------|---------|---------|---------|---------|---------|---------|---------|--|
| NR.                                        | 75     | 74      | 73      |         |         |         |         |         |         |  |
| CALC.                                      | 54.0   | 65.1    | 165.1   |         |         |         |         |         |         |  |
| C-O                                        | 0.0    | 0.0     | 0.0     |         |         |         |         |         |         |  |
| OBS.                                       | 0.0    | 0.0     | 0.0     |         |         |         |         |         |         |  |
| IRINT.                                     | 0.579  | 0.913   | 0.283   |         |         |         |         |         |         |  |
| RACT.                                      | 5.030  | 0.815   | 1.082   |         |         |         |         |         |         |  |
| DEPOL.                                     | 0.749  | 0.742   | 0.735   |         |         |         |         |         |         |  |
| NR.                                        | 72     | 71      | 70      | 69      | 68      | 67      | 66      | 65      | 64      |  |
| CALC.                                      | 177.0  | 186.5   | 208.2   | 232.7   | 281.4   | 315.8   | 317.9   | 387.3   | 439.6   |  |
| C-O                                        | -3.0   | 6.5     | 0.2     | -12.3   | -6.6    | -6.2    | -4.1    | -5.7    | -5.4    |  |
| OBS.                                       | 180.0  | 180.0   | 208.0   | 245.0   | 288.0   | 322.0   | 322.0   | 393.0   | 445.0   |  |
| IRINT.                                     | 0.165  | 0.357   | 0.839   | 0.921   | 0.845   | 1.472   | 0.221   | 5.030   | 6.081   |  |
| RACT.                                      | 0.641  | 0.224   | 0.478   | 0.336   | 2.173   | 1.306   | 2.005   | 0.934   | 0.743   |  |
| DEPOL.                                     | 0.716  | 0.702   | 0.660   | 0.242   | 0.296   | 0.664   | 0.629   | 0.604   | 0.362   |  |
| NR.                                        | 63     | 62      | 61      | 60      | 59      | 58      | 57      | 56      | 55      |  |
| CALC.                                      | 470.3  | 505.6   | 528.2   | 560.0   | 609.8   | 671.4   | 706.7   | 751.8   | 794.4   |  |
| C-O                                        | 1.3    | 0.6     | -1.8    | 3.0     | -1.2    | -0.6    | 5.7     | -4.2    | -2.6    |  |
| OBS.                                       | 469.0  | 505.0   | 530.0   | 557.0   | 611.0   | 672.0   | 701.0   | 756.0   | 797.0   |  |
| IRINT.                                     | 0.194  | 5.588   | 2.555   | 6.796   | 0.435   | 5.537   | 0.645   | 8.677   | 3.784   |  |
| RACT.                                      | 0.731  | 3.830   | 3.302   | 1.352   | 1.788   | 9.068   | 3.444   | 14.867  | 2.453   |  |
| DEPOL.                                     | 0.739  | 0.100   | 0.577   | 0.665   | 0.749   | 0.169   | 0.489   | 0.189   | 0.527   |  |
| NR.                                        | 54     | 53      | 52      | 51      | 50      | 49      | 48      | 47      | 46      |  |
| CALC.                                      | 843.0  | 881.4   | 888.2   | 905.4   | 912.1   | 971.4   | 976.4   | 997.4   | 1010.8  |  |
| C-O                                        | 0.0    | -5.6    | 1.2     | 0.4     | -3.9    | 1.4     | 6.4     | -0.6    | -3.2    |  |
| OBS.                                       | 843.0  | 887.0   | 887.0   | 905.0   | 916.0   | 970.0   | 970.0   | 998.0   | 1014.0  |  |
| IRINT.                                     | 13.297 | 7.290   | 0.803   | 33.129  | 1.095   | 2.248   | 1.300   | 5.002   | 6.425   |  |
| RACT.                                      | 1.974  | 5.687   | 1.393   | 0.256   | 0.832   | 0.868   | 0.922   | 3.155   | 4.335   |  |
| DEPOL.                                     | 0.383  | 0.382   | 0.473   | 0.628   | 0.098   | 0.500   | 0.703   | 0.732   | 0.210   |  |
| NR.                                        | 45     | 44      | 43      | 42      | 41      | 40      | 39      | 38      | 37      |  |
| CALC.                                      | 1026.7 | 1036.5  | 1041.2  | 1082.4  | 1092.7  | 1114.9  | 1180.9  | 1211.9  | 1215.5  |  |
| C-O                                        | -0.3   | -2.5    | 2.2     | 1.4     | -4.3    | -6.1    | -0.1    | -7.1    | -3.5    |  |
| OBS.                                       | 1027.0 | 1039.0  | 1039.0  | 1081.0  | 1097.0  | 1121.0  | 1181.0  | 1219.0  | 1219.0  |  |
| IRINT.                                     | 3.487  | 2.748   | 0.432   | 3.466   | 7.679   | 9.473   | 1.140   | 3.579   | 11.194  |  |
| RACT.                                      | 3.587  | 8.981   | 0.431   | 2.763   | 5.024   | 2.480   | 1.701   | 9.785   | 0.928   |  |
| DEPOL.                                     | 0.746  | 0.743   | 0.638   | 0.206   | 0.702   | 0.681   | 0.585   | 0.711   | 0.666   |  |
| NR.                                        | 36     | 35      | 34      | 33      | 32      | 31      | 30      | 29      | 28      |  |
| CALC.                                      | 1254.1 | 1280.9  | 1288.0  | 1306.6  | 1319.9  | 1345.0  | 1359.5  | 1363.8  | 1380.7  |  |
| C-O                                        | -0.9   | -1.1    | 0.0     | 6.6     | 8.9     | 8.0     | 0.5     | 4.8     | 2.7     |  |
| OBS.                                       | 1255.0 | 1282.0  | 1288.0  | 1300.0  | 1311.0  | 1337.0  | 1359.0  | 1359.0  | 1378.0  |  |
| IRINT.                                     | 4.143  | 3.686   | 1.395   | 0.369   | 7.230   | 2.523   | 0.530   | 2.016   | 1.240   |  |
| RACT.                                      | 3.235  | 0.694   | 10.720  | 6.410   | 7.319   | 4.273   | 5.729   | 3.700   | 4.115   |  |
| DEPOL.                                     | 0.540  | 0.479   | 0.537   | 0.736   | 0.446   | 0.637   | 0.397   | 0.749   | 0.616   |  |
| NR.                                        | 27     | 26      | 25      | 24      | 23      | 22      | 21      | 20      | 19      |  |
| CALC.                                      | 1382.4 | 1411.5  | 1427.6  | 1430.8  | 1432.9  | 1436.3  | 1444.9  | 1450.8  | 1451.9  |  |
| C-O                                        | 4.4    | -13.5   | 2.6     | -3.2    | -1.1    | 2.3     | -6.1    | -0.2    | 0.9     |  |
| OBS.                                       | 1378.0 | 1425.0  | 1425.0  | 1434.0  | 1434.0  | 1434.0  | 1451.0  | 1451.0  | 1451.0  |  |
| IRINT.                                     | 13.124 | 0.040   | 3.086   | 4.218   | 3.782   | 9.027   | 8.356   | 12.060  | 1.722   |  |
| RACT.                                      | 3.357  | 23.749  | 27.175  | 5.883   | 3.749   | 14.936  | 11.778  | 6.093   | 5.066   |  |
| DEPOL.                                     | 0.741  | 0.465   | 0.710   | 0.589   | 0.725   | 0.747   | 0.749   | 0.707   | 0.705   |  |
| NR.                                        | 18     | 17      | 16      | 15      | 14      | 13      | 12      | 11      | 10      |  |
| CALC.                                      | 1473.9 | 1645.2  | 2888.4  | 2892.4  | 2905.1  | 2909.1  | 2912.3  | 2919.5  | 2930.2  |  |
| C-O                                        | 5.9    | -0.8    | -1.6    | 2.4     | 15.1    | -10.9   | -7.7    | -0.5    | -2.8    |  |
| OBS.                                       | 1468.0 | 1646.0  | 2890.0  | 2890.0  | 2890.0  | 2920.0  | 2920.0  | 2920.0  | 2933.0  |  |
| IRINT.                                     | 6.374  | 19.386  | 9.984   | 34.010  | 12.340  | 37.540  | 25.857  | 15.582  | 36.539  |  |
| RACT.                                      | 4.374  | 25.437  | 38.575  | 87.416  | 428.932 | 165.198 | 125.961 | 122.123 | 115.850 |  |
| DEPOL.                                     | 0.318  | 0.157   | 0.550   | 0.166   | 0.496   | 0.029   | 0.216   | 0.107   | 0.280   |  |
| NR.                                        | 9      | 8       | 7       | 6       | 5       | 4       | 3       | 2       | 1       |  |
| CALC.                                      | 2951.1 | 2957.3  | 2966.1  | 2968.4  | 2972.5  | 2993.7  | 2998.7  | 3005.5  | 3091.6  |  |
| C-O                                        | -6.9   | -0.7    | -1.9    | 0.4     | -0.5    | 5.7     | 10.7    | -12.5   | 18.6    |  |
| OBS.                                       | 2958.0 | 2958.0  | 2968.0  | 2968.0  | 2973.0  | 2988.0  | 2988.0  | 3018.0  | 3073.0  |  |
| IRINT.                                     | 12.142 | 27.573  | 35.274  | 31.047  | 29.739  | 22.722  | 19.945  | 10.761  | 20.259  |  |
| RACT.                                      | 64.309 | 749.009 | 103.073 | 121.201 | 85.390  | 160.603 | 77.621  | 145.817 | 91.562  |  |
| DEPOL.                                     | 0.632  | 0.749   | 0.359   | 0.369   | 0.748   | 0.740   | 0.685   | 0.137   | 0.716   |  |

S-(-)-Limonene Oxide, eq-t255 (1.9 kJ/mol)

|        |       |       |       |       |       |       |       |       |       |  |
|--------|-------|-------|-------|-------|-------|-------|-------|-------|-------|--|
| NR.    | 75    | 74    | 73    |       |       |       |       |       |       |  |
| CALC.  | 42.9  | 67.3  | 171.6 |       |       |       |       |       |       |  |
| C-O    | 0.0   | 0.0   | 0.0   |       |       |       |       |       |       |  |
| OBS.   | 0.0   | 0.0   | 0.0   |       |       |       |       |       |       |  |
| IRINT. | 0.116 | 0.581 | 0.434 |       |       |       |       |       |       |  |
| RACT.  | 2.852 | 0.375 | 1.037 |       |       |       |       |       |       |  |
| DEPOL. | 0.749 | 0.750 | 0.722 |       |       |       |       |       |       |  |
| NR.    | 72    | 71    | 70    | 69    | 68    | 67    | 66    | 65    | 64    |  |
| CALC.  | 178.7 | 185.8 | 208.8 | 240.0 | 285.2 | 315.7 | 333.4 | 390.5 | 429.4 |  |
| C-O    | -1.3  | 5.8   | 0.8   | -5.0  | -2.8  | -6.3  | -4.6  | -2.5  | 0.0   |  |
| OBS.   | 180.0 | 180.0 | 208.0 | 245.0 | 288.0 | 322.0 | 338.0 | 393.0 | 0.0   |  |
| IRINT. | 0.498 | 0.151 | 1.107 | 0.922 | 0.138 | 1.916 | 0.586 | 5.034 | 3.358 |  |

## Supplementary Material (ESI) for PCCP

This journal is © the Owner Societies 2009

|        |        |        |         |        |         |        |         |         |         |
|--------|--------|--------|---------|--------|---------|--------|---------|---------|---------|
| RACT.  | 0.058  | 0.565  | 0.629   | 0.767  | 2.639   | 0.472  | 1.836   | 1.032   | 0.711   |
| DEPOL. | 0.724  | 0.739  | 0.725   | 0.438  | 0.298   | 0.293  | 0.748   | 0.344   | 0.695   |
| NR.    | 63     | 62     | 61      | 60     | 59      | 58     | 57      | 56      | 55      |
| CALC.  | 457.2  | 490.3  | 541.0   | 553.9  | 610.1   | 673.3  | 694.5   | 759.7   | 805.9   |
| C-O    | -1.8   | 2.3    | 4.0     | -3.1   | -0.9    | -4.7   | -6.5    | -0.3    | -1.1    |
| OBS.   | 459.0  | 488.0  | 537.0   | 557.0  | 611.0   | 678.0  | 701.0   | 760.0   | 807.0   |
| IRINT. | 3.908  | 1.464  | 1.692   | 6.842  | 0.551   | 5.977  | 0.514   | 7.424   | 4.722   |
| RACT.  | 0.894  | 1.651  | 4.155   | 1.659  | 1.720   | 10.755 | 5.981   | 12.754  | 0.874   |
| DEPOL. | 0.750  | 0.422  | 0.260   | 0.730  | 0.744   | 0.168  | 0.380   | 0.283   | 0.231   |
| NR.    | 54     | 53     | 52      | 51     | 50      | 49     | 48      | 47      | 46      |
| CALC.  | 846.0  | 885.8  | 897.4   | 907.2  | 912.4   | 967.4  | 983.0   | 989.9   | 1008.1  |
| C-O    | 3.0    | -1.2   | -2.6    | 2.2    | -3.6    | -2.6   | 0.0     | -8.1    | -5.9    |
| OBS.   | 843.0  | 887.0  | 900.0   | 905.0  | 916.0   | 970.0  | 983.0   | 998.0   | 1014.0  |
| IRINT. | 15.088 | 3.242  | 3.460   | 27.796 | 4.252   | 2.921  | 1.374   | 3.852   | 5.412   |
| RACT.  | 2.843  | 1.804  | 5.033   | 0.773  | 1.560   | 1.145  | 2.165   | 4.508   | 0.793   |
| DEPOL. | 0.479  | 0.691  | 0.385   | 0.308  | 0.116   | 0.750  | 0.471   | 0.722   | 0.663   |
| NR.    | 45     | 44     | 43      | 42     | 41      | 40     | 39      | 38      | 37      |
| CALC.  | 1022.3 | 1039.0 | 1039.7  | 1084.5 | 1098.1  | 1121.0 | 1179.9  | 1202.6  | 1215.4  |
| C-O    | -1.7   | 0.0    | 0.7     | 3.5    | 1.1     | 0.0    | -1.1    | -6.4    | -3.6    |
| OBS.   | 1024.0 | 1039.0 | 1039.0  | 1081.0 | 1097.0  | 1121.0 | 1181.0  | 1209.0  | 1219.0  |
| IRINT. | 3.871  | 1.233  | 1.893   | 1.696  | 10.697  | 4.237  | 1.125   | 7.660   | 13.411  |
| RACT.  | 3.300  | 8.343  | 0.802   | 2.814  | 3.179   | 2.408  | 1.345   | 6.161   | 5.471   |
| DEPOL. | 0.283  | 0.726  | 0.733   | 0.108  | 0.641   | 0.748  | 0.613   | 0.627   | 0.697   |
| NR.    | 36     | 35     | 34      | 33     | 32      | 31     | 30      | 29      | 28      |
| CALC.  | 1246.5 | 1259.7 | 1298.3  | 1313.6 | 1323.2  | 1336.2 | 1362.0  | 1377.7  | 1381.6  |
| C-O    | 2.5    | 4.7    | -0.7    | 2.6    | 0.0     | -0.8   | 3.0     | -0.3    | 3.6     |
| OBS.   | 1244.0 | 1255.0 | 1299.0  | 1311.0 | 0.0     | 1337.0 | 1359.0  | 1378.0  | 1378.0  |
| IRINT. | 2.435  | 4.913  | 1.150   | 2.737  | 4.196   | 2.716  | 1.900   | 3.306   | 5.331   |
| RACT.  | 2.445  | 2.275  | 9.589   | 5.027  | 5.863   | 4.292  | 2.643   | 5.130   | 1.496   |
| DEPOL. | 0.472  | 0.736  | 0.748   | 0.465  | 0.719   | 0.447  | 0.225   | 0.650   | 0.699   |
| NR.    | 27     | 26     | 25      | 24     | 23      | 22     | 21      | 20      | 19      |
| CALC.  | 1382.1 | 1409.1 | 1428.3  | 1432.0 | 1434.6  | 1436.5 | 1445.1  | 1449.8  | 1454.1  |
| C-O    | 4.1    | 0.0    | 3.3     | -2.0   | 0.6     | 2.5    | -5.9    | -1.2    | 3.1     |
| OBS.   | 1378.0 | 0.0    | 1425.0  | 1434.0 | 1434.0  | 1434.0 | 1451.0  | 1451.0  | 1451.0  |
| IRINT. | 3.309  | 0.232  | 3.310   | 7.218  | 6.677   | 2.391  | 7.250   | 15.881  | 0.249   |
| RACT.  | 6.308  | 33.205 | 25.395  | 5.277  | 2.066   | 7.078  | 12.968  | 4.759   | 4.765   |
| DEPOL. | 0.663  | 0.541  | 0.673   | 0.725  | 0.626   | 0.748  | 0.750   | 0.699   | 0.699   |
| NR.    | 18     | 17     | 16      | 15     | 14      | 13     | 12      | 11      | 10      |
| CALC.  | 1474.9 | 1647.6 | 2850.4  | 2891.8 | 2896.7  | 2908.2 | 2909.1  | 2921.4  | 2932.5  |
| C-O    | 6.9    | 1.6    | 8.4     | 1.8    | 6.7     | -11.8  | -10.9   | 1.4     | -0.5    |
| OBS.   | 1468.0 | 1646.0 | 2842.0  | 2890.0 | 2890.0  | 2920.0 | 2920.0  | 2920.0  | 2933.0  |
| IRINT. | 4.728  | 20.430 | 22.906  | 29.324 | 23.893  | 31.634 | 28.017  | 11.055  | 34.819  |
| RACT.  | 4.038  | 19.577 | 62.683  | 52.587 | 143.044 | 50.074 | 213.275 | 72.792  | 100.305 |
| DEPOL. | 0.324  | 0.111  | 0.270   | 0.203  | 0.018   | 0.198  | 0.027   | 0.380   | 0.190   |
| NR.    | 9      | 8      | 7       | 6      | 5       | 4      | 3       | 2       | 1       |
| CALC.  | 2945.8 | 2952.5 | 2966.7  | 2970.1 | 2972.5  | 2992.1 | 2998.6  | 3019.2  | 3106.5  |
| C-O    | -12.2  | -5.5   | -1.3    | 2.1    | -0.5    | 4.1    | 10.6    | 1.2     | 24.5    |
| OBS.   | 2958.0 | 2958.0 | 2968.0  | 2968.0 | 2973.0  | 2988.0 | 2988.0  | 3018.0  | 3082.0  |
| IRINT. | 26.830 | 8.988  | 58.917  | 12.498 | 31.726  | 23.303 | 20.162  | 9.271   | 16.188  |
| RACT.  | 61.470 | 48.107 | 119.689 | 97.790 | 80.612  | 76.970 | 77.125  | 149.494 | 66.198  |
| DEPOL. | 0.717  | 0.716  | 0.199   | 0.440  | 0.732   | 0.680  | 0.687   | 0.157   | 0.750   |

S(-)-Limonene Oxide, eq-cl10 (2.0 kJ/mol)

|        |        |        |        |        |        |        |        |        |        |
|--------|--------|--------|--------|--------|--------|--------|--------|--------|--------|
| NR.    | 75     | 74     | 73     |        |        |        |        |        |        |
| CALC.  | 44.1   | 78.0   | 151.4  |        |        |        |        |        |        |
| C-O    | 0.0    | 0.0    | 0.0    |        |        |        |        |        |        |
| OBS.   | 0.0    | 0.0    | 0.0    |        |        |        |        |        |        |
| IRINT. | 0.020  | 0.857  | 0.497  |        |        |        |        |        |        |
| RACT.  | 4.783  | 0.343  | 1.066  |        |        |        |        |        |        |
| DEPOL. | 0.715  | 0.660  | 0.520  |        |        |        |        |        |        |
| NR.    | 72     | 71     | 70     | 69     | 68     | 67     | 66     | 65     | 64     |
| CALC.  | 175.6  | 182.8  | 203.8  | 241.1  | 262.5  | 321.3  | 333.9  | 401.0  | 410.6  |
| C-O    | -4.4   | 2.8    | -4.2   | -3.9   | -7.5   | -0.7   | -4.1   | -1.0   | 0.0    |
| OBS.   | 180.0  | 180.0  | 208.0  | 245.0  | 270.0  | 322.0  | 338.0  | 402.0  | 0.0    |
| IRINT. | 0.169  | 0.436  | 0.371  | 0.549  | 0.972  | 0.481  | 0.556  | 8.206  | 3.641  |
| RACT.  | 1.535  | 0.292  | 1.250  | 1.243  | 1.395  | 1.676  | 2.961  | 0.992  | 0.580  |
| DEPOL. | 0.691  | 0.720  | 0.495  | 0.459  | 0.198  | 0.589  | 0.461  | 0.733  | 0.749  |
| NR.    | 63     | 62     | 61     | 60     | 59     | 58     | 57     | 56     | 55     |
| CALC.  | 467.7  | 501.1  | 531.5  | 558.4  | 631.0  | 677.4  | 708.9  | 759.0  | 787.5  |
| C-O    | -1.3   | -3.9   | -1.5   | 1.4    | -2.0   | -0.6   | 7.9    | -1.0   | -4.5   |
| OBS.   | 469.0  | 505.0  | 533.0  | 557.0  | 633.0  | 678.0  | 701.0  | 760.0  | 792.0  |
| IRINT. | 2.168  | 2.640  | 4.962  | 5.136  | 0.297  | 4.899  | 0.543  | 12.312 | 1.784  |
| RACT.  | 1.001  | 3.719  | 2.868  | 1.894  | 1.306  | 12.482 | 3.248  | 8.966  | 7.423  |
| DEPOL. | 0.523  | 0.245  | 0.749  | 0.704  | 0.746  | 0.167  | 0.621  | 0.348  | 0.171  |
| NR.    | 54     | 53     | 52     | 51     | 50     | 49     | 48     | 47     | 46     |
| CALC.  | 845.5  | 872.1  | 899.9  | 909.6  | 920.8  | 948.5  | 977.0  | 1006.2 | 1011.0 |
| C-O    | 2.5    | 0.0    | -0.1   | -6.4   | 4.8    | -1.5   | -6.0   | 8.2    | -3.0   |
| OBS.   | 843.0  | 0.0    | 900.0  | 916.0  | 916.0  | 950.0  | 983.0  | 998.0  | 1014.0 |
| IRINT. | 12.005 | 2.555  | 4.798  | 30.440 | 0.538  | 7.404  | 1.702  | 1.023  | 4.412  |
| RACT.  | 3.999  | 1.821  | 2.838  | 0.692  | 2.608  | 1.794  | 0.993  | 6.346  | 4.681  |
| DEPOL. | 0.296  | 0.696  | 0.336  | 0.572  | 0.604  | 0.533  | 0.743  | 0.154  | 0.716  |
| NR.    | 45     | 44     | 43     | 42     | 41     | 40     | 39     | 38     | 37     |
| CALC.  | 1035.7 | 1040.6 | 1045.2 | 1058.5 | 1097.5 | 1117.4 | 1180.7 | 1196.0 | 1232.0 |
| C-O    | -3.3   | 1.6    | 6.2    | 2.5    | 0.5    | -3.6   | -0.3   | -1.0   | 3.0    |
| OBS.   | 1039.0 | 1039.0 | 1039.0 | 1056.0 | 1097.0 | 1121.0 | 1181.0 | 1197.0 | 1229.0 |
| IRINT. | 5.341  | 2.516  | 4.756  | 5.653  | 0.312  | 14.092 | 9.939  | 3.739  | 6.345  |
| RACT.  | 1.708  | 2.943  | 6.013  | 5.806  | 3.315  | 2.391  | 2.046  | 2.821  | 0.893  |
| DEPOL. | 0.654  | 0.728  | 0.748  | 0.750  | 0.736  | 0.527  | 0.498  | 0.626  | 0.459  |
| NR.    | 36     | 35     | 34     | 33     | 32     | 31     | 30     | 29     | 28     |
| CALC.  | 1255.3 | 1276.0 | 1284.2 | 1304.4 | 1313.6 | 1349.6 | 1355.3 | 1366.4 | 1380.3 |

## Supplementary Material (ESI) for PCCP

This journal is © the Owner Societies 2009

|        |        |        |        |        |        |        |        |        |        |
|--------|--------|--------|--------|--------|--------|--------|--------|--------|--------|
| C-O    | 0.3    | -6.0   | -3.8   | 5.4    | 2.6    | -9.4   | -3.7   | 7.4    | 2.3    |
| OBS.   | 1255.0 | 1282.0 | 1288.0 | 1299.0 | 1311.0 | 1359.0 | 1359.0 | 1378.0 | 1378.0 |
| IRINT. | 4.605  | 4.879  | 1.474  | 1.303  | 5.115  | 2.368  | 0.249  | 1.976  | 4.068  |
| RACT.  | 9.064  | 2.935  | 7.114  | 7.554  | 8.858  | 7.853  | 5.198  | 6.407  | 2.142  |
| DEPOL. | 0.590  | 0.567  | 0.512  | 0.749  | 0.472  | 0.383  | 0.719  | 0.748  | 0.510  |

|        |        |        |        |        |        |        |        |        |        |
|--------|--------|--------|--------|--------|--------|--------|--------|--------|--------|
| NR.    | 27     | 26     | 25     | 24     | 23     | 22     | 21     | 20     | 19     |
| CALC.  | 1382.1 | 1411.8 | 1428.0 | 1433.3 | 1435.7 | 1436.9 | 1446.2 | 1451.3 | 1456.1 |
| C-O    | 4.1    | -13.2  | 3.0    | -0.7   | 1.7    | 2.9    | -4.8   | 0.3    | 5.1    |
| OBS.   | 1378.0 | 1425.0 | 1425.0 | 1434.0 | 1434.0 | 1434.0 | 1451.0 | 1451.0 | 1451.0 |
| IRINT. | 10.224 | 0.238  | 3.038  | 5.086  | 2.526  | 4.859  | 6.424  | 9.859  | 2.726  |
| RACT.  | 6.652  | 23.627 | 19.896 | 19.331 | 2.080  | 5.874  | 14.362 | 3.746  | 6.901  |
| DEPOL. | 0.732  | 0.442  | 0.695  | 0.738  | 0.680  | 0.746  | 0.750  | 0.641  | 0.741  |

|        |        |        |        |        |        |         |         |        |        |
|--------|--------|--------|--------|--------|--------|---------|---------|--------|--------|
| NR.    | 18     | 17     | 16     | 15     | 14     | 13      | 12      | 11     | 10     |
| CALC.  | 1473.2 | 1645.3 | 2894.8 | 2898.1 | 2904.2 | 2905.3  | 2908.7  | 2925.5 | 2939.8 |
| C-O    | 5.2    | -0.7   | 4.8    | 8.1    | -15.8  | -14.7   | -11.3   | 5.5    | 6.8    |
| OBS.   | 1468.0 | 1646.0 | 2890.0 | 2890.0 | 2920.0 | 2920.0  | 2920.0  | 2920.0 | 2933.0 |
| IRINT. | 7.457  | 19.817 | 11.802 | 15.476 | 13.828 | 31.036  | 42.081  | 3.816  | 49.138 |
| RACT.  | 1.934  | 24.996 | 29.475 | 43.069 | 34.559 | 150.011 | 274.187 | 49.332 | 17.836 |
| DEPOL. | 0.138  | 0.150  | 0.420  | 0.743  | 0.064  | 0.062   | 0.039   | 0.745  | 0.652  |

|        |         |        |        |         |        |        |        |         |        |
|--------|---------|--------|--------|---------|--------|--------|--------|---------|--------|
| NR.    | 9       | 8      | 7      | 6       | 5      | 4      | 3      | 2       | 1      |
| CALC.  | 2943.7  | 2952.9 | 2954.5 | 2956.5  | 2970.4 | 2992.5 | 2998.1 | 3006.5  | 3093.4 |
| C-O    | 10.7    | -5.1   | -3.5   | -1.5    | -2.6   | 4.5    | 10.1   | -11.5   | 20.4   |
| OBS.   | 2933.0  | 2958.0 | 2958.0 | 2958.0  | 2973.0 | 2988.0 | 2988.0 | 3018.0  | 3073.0 |
| IRINT. | 7.537   | 40.947 | 12.451 | 57.102  | 24.504 | 23.040 | 20.025 | 10.495  | 19.165 |
| RACT.  | 125.521 | 42.917 | 94.575 | 145.758 | 83.966 | 72.796 | 78.415 | 146.533 | 89.881 |
| DEPOL. | 0.332   | 0.353  | 0.748  | 0.181   | 0.750  | 0.693  | 0.702  | 0.132   | 0.727  |

S-(-)-Limonene Oxide, eq-c255 (2.5 kJ/mol)

|        |       |       |       |
|--------|-------|-------|-------|
| NR.    | 75    | 74    | 73    |
| CALC.  | 43.7  | 79.3  | 152.2 |
| C-O    | 0.0   | 0.0   | 0.0   |
| OBS.   | 0.0   | 0.0   | 0.0   |
| IRINT. | 0.638 | 1.345 | 0.363 |
| RACT.  | 3.176 | 0.538 | 0.218 |
| DEPOL. | 0.749 | 0.739 | 0.750 |

|        |       |       |       |       |       |       |       |       |       |
|--------|-------|-------|-------|-------|-------|-------|-------|-------|-------|
| NR.    | 72    | 71    | 70    | 69    | 68    | 67    | 66    | 65    | 64    |
| CALC.  | 179.0 | 188.3 | 204.1 | 244.5 | 281.9 | 317.5 | 340.4 | 403.3 | 417.3 |
| C-O    | -1.0  | 8.3   | -3.9  | -0.5  | -6.1  | -4.5  | 2.4   | 1.3   | 0.0   |
| OBS.   | 180.0 | 180.0 | 208.0 | 245.0 | 288.0 | 322.0 | 338.0 | 402.0 | 0.0   |
| IRINT. | 0.385 | 0.098 | 0.271 | 0.491 | 0.512 | 0.191 | 1.520 | 6.691 | 6.128 |
| RACT.  | 0.501 | 0.643 | 0.580 | 0.667 | 3.616 | 0.748 | 0.920 | 0.571 | 0.981 |
| DEPOL. | 0.705 | 0.748 | 0.658 | 0.707 | 0.282 | 0.734 | 0.748 | 0.614 | 0.559 |

|        |       |       |       |       |       |        |       |        |       |
|--------|-------|-------|-------|-------|-------|--------|-------|--------|-------|
| NR.    | 63    | 62    | 61    | 60    | 59    | 58     | 57    | 56     | 55    |
| CALC.  | 443.3 | 495.1 | 540.7 | 551.9 | 632.1 | 679.4  | 693.8 | 760.7  | 799.1 |
| C-O    | -1.7  | 7.1   | 3.7   | -5.1  | -0.9  | 1.4    | -7.2  | 0.7    | 2.1   |
| OBS.   | 445.0 | 488.0 | 537.0 | 557.0 | 633.0 | 678.0  | 701.0 | 760.0  | 797.0 |
| IRINT. | 0.330 | 1.145 | 4.484 | 7.201 | 0.379 | 5.454  | 0.279 | 13.484 | 2.183 |
| RACT.  | 0.819 | 2.426 | 3.317 | 1.561 | 1.492 | 12.238 | 7.049 | 7.048  | 1.848 |
| DEPOL. | 0.614 | 0.379 | 0.319 | 0.556 | 0.697 | 0.189  | 0.342 | 0.403  | 0.193 |

|        |        |       |        |        |       |       |       |       |        |
|--------|--------|-------|--------|--------|-------|-------|-------|-------|--------|
| NR.    | 54     | 53    | 52     | 51     | 50    | 49    | 48    | 47    | 46     |
| CALC.  | 848.4  | 881.1 | 901.8  | 906.6  | 920.8 | 950.1 | 974.7 | 992.5 | 1018.7 |
| C-O    | 5.4    | -5.9  | 1.8    | 1.6    | 4.8   | 0.1   | 4.7   | -5.5  | -4.3   |
| OBS.   | 843.0  | 887.0 | 900.0  | 905.0  | 916.0 | 950.0 | 970.0 | 998.0 | 1023.0 |
| IRINT. | 11.076 | 0.970 | 15.208 | 19.639 | 1.148 | 4.959 | 3.693 | 0.393 | 3.771  |
| RACT.  | 5.771  | 1.895 | 2.175  | 1.736  | 1.618 | 1.067 | 2.387 | 1.905 | 3.406  |
| DEPOL. | 0.210  | 0.381 | 0.230  | 0.139  | 0.743 | 0.715 | 0.453 | 0.746 | 0.381  |

|        |        |        |        |        |        |        |        |        |        |
|--------|--------|--------|--------|--------|--------|--------|--------|--------|--------|
| NR.    | 45     | 44     | 43     | 42     | 41     | 40     | 39     | 38     | 37     |
| CALC.  | 1032.9 | 1036.8 | 1050.5 | 1057.3 | 1106.3 | 1117.9 | 1178.5 | 1193.3 | 1222.0 |
| C-O    | 5.9    | -2.2   | -5.5   | 1.3    | 0.0    | -3.1   | -2.5   | -3.7   | 3.0    |
| OBS.   | 1027.0 | 1039.0 | 1056.0 | 1056.0 | 0.0    | 1121.0 | 1181.0 | 1197.0 | 1219.0 |
| IRINT. | 1.439  | 6.608  | 3.485  | 3.973  | 0.569  | 12.753 | 6.424  | 0.383  | 13.849 |
| RACT.  | 1.350  | 2.408  | 9.099  | 5.576  | 1.883  | 2.595  | 2.590  | 2.606  | 2.250  |
| DEPOL. | 0.484  | 0.670  | 0.731  | 0.693  | 0.743  | 0.375  | 0.215  | 0.397  | 0.730  |

|        |        |        |        |        |        |        |        |        |        |
|--------|--------|--------|--------|--------|--------|--------|--------|--------|--------|
| NR.    | 36     | 35     | 34     | 33     | 32     | 31     | 30     | 29     | 28     |
| CALC.  | 1253.2 | 1258.4 | 1288.3 | 1306.1 | 1320.9 | 1342.1 | 1357.7 | 1378.1 | 1381.2 |
| C-O    | -1.8   | 3.4    | 0.3    | -4.9   | 9.9    | 5.1    | -1.3   | 0.1    | 3.2    |
| OBS.   | 1255.0 | 1255.0 | 1288.0 | 1311.0 | 1311.0 | 1337.0 | 1359.0 | 1378.0 | 1378.0 |
| IRINT. | 5.032  | 2.379  | 4.789  | 4.866  | 0.580  | 1.443  | 1.925  | 3.224  | 6.469  |
| RACT.  | 4.517  | 3.650  | 6.613  | 10.647 | 4.769  | 3.335  | 2.269  | 5.414  | 4.144  |
| DEPOL. | 0.658  | 0.603  | 0.719  | 0.549  | 0.742  | 0.375  | 0.458  | 0.632  | 0.669  |

|        |        |        |        |        |        |        |        |        |        |
|--------|--------|--------|--------|--------|--------|--------|--------|--------|--------|
| NR.    | 27     | 26     | 25     | 24     | 23     | 22     | 21     | 20     | 19     |
| CALC.  | 1386.4 | 1409.2 | 1428.2 | 1433.1 | 1435.2 | 1436.0 | 1446.2 | 1450.5 | 1458.3 |
| C-O    | -8.6   | -15.8  | 3.2    | -0.9   | 1.2    | 2.0    | -4.8   | -0.5   | 7.3    |
| OBS.   | 1395.0 | 1425.0 | 1425.0 | 1434.0 | 1434.0 | 1434.0 | 1451.0 | 1451.0 | 1451.0 |
| IRINT. | 2.331  | 0.301  | 4.086  | 0.641  | 6.558  | 3.354  | 6.349  | 15.822 | 1.260  |
| RACT.  | 5.291  | 33.396 | 14.815 | 5.532  | 14.687 | 5.634  | 13.596 | 5.750  | 4.556  |
| DEPOL. | 0.520  | 0.567  | 0.632  | 0.749  | 0.750  | 0.742  | 0.750  | 0.689  | 0.732  |

|        |        |        |        |        |         |        |        |         |        |
|--------|--------|--------|--------|--------|---------|--------|--------|---------|--------|
| NR.    | 18     | 17     | 16     | 15     | 14      | 13     | 12     | 11      | 10     |
| CALC.  | 1474.7 | 1647.3 | 2889.4 | 2896.4 | 2899.9  | 2903.4 | 2904.2 | 2908.7  | 2941.5 |
| C-O    | 6.7    | 1.3    | -0.6   | 6.4    | 9.9     | -16.6  | -15.8  | -11.3   | 8.5    |
| OBS.   | 1468.0 | 1646.0 | 2890.0 | 2890.0 | 2890.0  | 2920.0 | 2920.0 | 2920.0  | 2933.0 |
| IRINT. | 9.785  | 21.266 | 1.665  | 2.883  | 30.873  | 40.516 | 4.841  | 42.178  | 30.302 |
| RACT.  | 1.746  | 19.433 | 87.346 | 30.231 | 176.675 | 21.376 | 16.172 | 241.932 | 56.705 |
| DEPOL. | 0.121  | 0.116  | 0.256  | 0.231  | 0.033   | 0.072  | 0.688  | 0.037   | 0.586  |

|        |        |        |        |         |        |        |        |         |        |
|--------|--------|--------|--------|---------|--------|--------|--------|---------|--------|
| NR.    | 9      | 8      | 7      | 6       | 5      | 4      | 3      | 2       | 1      |
| CALC.  | 2945.3 | 2950.7 | 2955.9 | 2956.6  | 2970.7 | 2992.6 | 2998.2 | 3018.6  | 3103.9 |
| C-O    | -12.7  | -7.3   | -2.1   | -1.4    | 2.7    | 4.6    | 10.2   | 0.6     | 21.9   |
| OBS.   | 2958.0 | 2958.0 | 2958.0 | 2958.0  | 2968.0 | 2988.0 | 2988.0 | 3018.0  | 3082.0 |
| IRINT. | 25.987 | 16.826 | 33.933 | 55.230  | 24.095 | 23.800 | 19.847 | 9.204   | 17.170 |
| RACT.  | 81.484 | 82.978 | 73.477 | 167.635 | 83.195 | 75.190 | 77.648 | 145.559 | 67.468 |
| DEPOL. | 0.398  | 0.728  | 0.442  | 0.170   | 0.750  | 0.687  | 0.700  | 0.153   | 0.748  |

Supplementary Material (ESI) for *PCCP*  
 This journal is © the Owner Societies 2009

S-(-)-Limonene Oxide, eq-c305 (2.8 kJ/mol)

|        |        |        |        |         |         |        |         |         |        |
|--------|--------|--------|--------|---------|---------|--------|---------|---------|--------|
| NR.    | 75     | 74     | 73     |         |         |        |         |         |        |
| CALC.  | 33.0   | 76.7   | 143.8  |         |         |        |         |         |        |
| C-O    | 0.0    | 0.0    | 0.0    |         |         |        |         |         |        |
| OBS.   | 0.0    | 0.0    | 0.0    |         |         |        |         |         |        |
| IRINT. | 0.744  | 4.535  | 0.385  |         |         |        |         |         |        |
| RACT.  | 3.208  | 0.420  | 0.159  |         |         |        |         |         |        |
| DEPOL. | 0.749  | 0.734  | 0.745  |         |         |        |         |         |        |
| NR.    | 72     | 71     | 70     | 69      | 68      | 67     | 66      | 65      | 64     |
| CALC.  | 169.0  | 185.9  | 207.8  | 241.6   | 288.3   | 320.7  | 331.5   | 396.4   | 409.1  |
| C-O    | -11.0  | 5.9    | -0.2   | -3.4    | 0.3     | -1.3   | -6.5    | 3.4     | 7.1    |
| OBS.   | 180.0  | 180.0  | 208.0  | 245.0   | 288.0   | 322.0  | 338.0   | 393.0   | 402.0  |
| IRINT. | 0.601  | 0.754  | 1.180  | 0.738   | 0.736   | 0.791  | 0.814   | 9.131   | 4.751  |
| RACT.  | 0.377  | 0.913  | 0.276  | 0.217   | 3.855   | 0.302  | 1.438   | 1.076   | 0.305  |
| DEPOL. | 0.732  | 0.742  | 0.655  | 0.342   | 0.272   | 0.746  | 0.744   | 0.749   | 0.750  |
| NR.    | 63     | 62     | 61     | 60      | 59      | 58     | 57      | 56      | 55     |
| CALC.  | 450.8  | 499.1  | 522.9  | 565.4   | 631.4   | 674.7  | 682.4   | 759.4   | 791.4  |
| C-O    | 5.8    | -5.9   | -3.1   | 8.4     | -1.6    | -3.3   | 4.4     | -0.6    | -0.6   |
| OBS.   | 445.0  | 505.0  | 526.0  | 557.0   | 633.0   | 678.0  | 678.0   | 760.0   | 792.0  |
| IRINT. | 0.137  | 4.056  | 7.376  | 4.818   | 1.069   | 8.418  | 20.170  | 14.443  | 0.333  |
| RACT.  | 1.266  | 2.078  | 3.426  | 1.632   | 1.603   | 11.919 | 4.438   | 8.685   | 3.953  |
| DEPOL. | 0.703  | 0.510  | 0.379  | 0.335   | 0.645   | 0.134  | 0.594   | 0.397   | 0.249  |
| NR.    | 54     | 53     | 52     | 51      | 50      | 49     | 48      | 47      | 46     |
| CALC.  | 850.3  | 885.2  | 903.6  | 905.3   | 919.8   | 947.2  | 983.0   | 996.0   | 1014.8 |
| C-O    | 7.3    | -1.8   | -1.4   | 0.3     | 3.8     | -2.8   | 0.0     | -2.0    | 0.8    |
| OBS.   | 843.0  | 887.0  | 905.0  | 905.0   | 916.0   | 950.0  | 983.0   | 998.0   | 1014.0 |
| IRINT. | 12.254 | 2.300  | 27.335 | 6.386   | 2.397   | 3.475  | 6.081   | 4.734   | 3.039  |
| RACT.  | 4.077  | 2.143  | 1.434  | 2.284   | 1.586   | 2.056  | 1.145   | 5.367   | 2.145  |
| DEPOL. | 0.144  | 0.298  | 0.197  | 0.260   | 0.684   | 0.712  | 0.161   | 0.542   | 0.497  |
| NR.    | 45     | 44     | 43     | 42      | 41      | 40     | 39      | 38      | 37     |
| CALC.  | 1033.0 | 1045.0 | 1052.2 | 1068.7  | 1101.6  | 1120.0 | 1180.6  | 1197.0  | 1213.2 |
| C-O    | -6.0   | 6.0    | -3.8   | -12.3   | 4.6     | -1.0   | -0.4    | 0.0     | -5.8   |
| OBS.   | 1039.0 | 1039.0 | 1056.0 | 1081.0  | 1097.0  | 1121.0 | 1181.0  | 1197.0  | 1219.0 |
| IRINT. | 5.336  | 4.558  | 1.833  | 3.527   | 0.274   | 15.561 | 5.287   | 1.643   | 5.266  |
| RACT.  | 2.014  | 4.048  | 4.620  | 1.799   | 3.983   | 3.110  | 1.892   | 5.919   | 0.474  |
| DEPOL. | 0.750  | 0.703  | 0.730  | 0.505   | 0.747   | 0.428  | 0.400   | 0.399   | 0.394  |
| NR.    | 36     | 35     | 34     | 33      | 32      | 31     | 30      | 29      | 28     |
| CALC.  | 1245.9 | 1265.8 | 1297.7 | 1300.3  | 1319.0  | 1343.3 | 1359.6  | 1377.2  | 1380.5 |
| C-O    | -9.1   | 10.8   | -1.3   | 1.3     | 8.0     | 6.3    | 0.6     | -0.8    | 2.5    |
| OBS.   | 1255.0 | 1255.0 | 1299.0 | 1299.0  | 1311.0  | 1337.0 | 1359.0  | 1378.0  | 1378.0 |
| IRINT. | 7.295  | 0.617  | 3.938  | 0.665   | 4.295   | 2.905  | 1.657   | 6.491   | 0.682  |
| RACT.  | 3.945  | 6.744  | 7.888  | 4.437   | 4.132   | 7.072  | 2.856   | 3.223   | 5.311  |
| DEPOL. | 0.564  | 0.728  | 0.566  | 0.746   | 0.526   | 0.749  | 0.358   | 0.600   | 0.622  |
| NR.    | 27     | 26     | 25     | 24      | 23      | 22     | 21      | 20      | 19     |
| CALC.  | 1386.8 | 1405.1 | 1427.8 | 1432.9  | 1435.2  | 1436.5 | 1444.9  | 1448.8  | 1456.5 |
| C-O    | -8.2   | 10.1   | 2.8    | -1.1    | 1.2     | 2.5    | -6.1    | -2.2    | 5.5    |
| OBS.   | 1395.0 | 1395.0 | 1425.0 | 1434.0  | 1434.0  | 1434.0 | 1451.0  | 1451.0  | 1451.0 |
| IRINT. | 2.216  | 7.022  | 3.670  | 0.710   | 10.844  | 2.294  | 4.212   | 16.144  | 4.847  |
| RACT.  | 6.106  | 28.088 | 15.774 | 13.945  | 4.682   | 2.964  | 15.118  | 6.565   | 9.162  |
| DEPOL. | 0.502  | 0.548  | 0.707  | 0.739   | 0.723   | 0.717  | 0.745   | 0.729   | 0.744  |
| NR.    | 18     | 17     | 16     | 15      | 14      | 13     | 12      | 11      | 10     |
| CALC.  | 1475.0 | 1650.8 | 2884.3 | 2897.5  | 2901.8  | 2903.1 | 2906.8  | 2908.8  | 2941.6 |
| C-O    | 7.0    | 4.8    | -5.7   | 7.5     | 11.8    | -16.9  | -13.2   | -11.2   | 8.6    |
| OBS.   | 1468.0 | 1646.0 | 2890.0 | 2890.0  | 2890.0  | 2920.0 | 2920.0  | 2920.0  | 2933.0 |
| IRINT. | 8.770  | 19.542 | 16.233 | 18.065  | 4.043   | 16.413 | 47.799  | 17.073  | 26.326 |
| RACT.  | 2.461  | 19.001 | 21.258 | 66.119  | 262.724 | 12.155 | 112.682 | 84.309  | 63.315 |
| DEPOL. | 0.162  | 0.121  | 0.400  | 0.157   | 0.060   | 0.436  | 0.049   | 0.057   | 0.674  |
| NR.    | 9      | 8      | 7      | 6       | 5       | 4      | 3       | 2       | 1      |
| CALC.  | 2944.0 | 2953.2 | 2956.5 | 2958.4  | 2970.6  | 2991.5 | 2998.7  | 3019.2  | 3104.5 |
| C-O    | 11.0   | -4.8   | -1.5   | 0.4     | -2.4    | 3.5    | 10.7    | 1.2     | 22.5   |
| OBS.   | 2933.0 | 2958.0 | 2958.0 | 2958.0  | 2973.0  | 2988.0 | 2988.0  | 3018.0  | 3082.0 |
| IRINT. | 16.352 | 28.487 | 43.057 | 55.069  | 24.104  | 29.667 | 17.241  | 11.565  | 4.941  |
| RACT.  | 88.959 | 89.890 | 74.764 | 162.267 | 79.956  | 85.486 | 69.785  | 133.903 | 71.898 |
| DEPOL. | 0.331  | 0.721  | 0.395  | 0.165   | 0.750   | 0.606  | 0.742   | 0.148   | 0.738  |

**Table 4S:** Potential energy distribution (PED) coming from the output of the MolVib program for the five most stable equatorial conformers (eq-t110, eq-t255, eq-c110, eq-c255 and eq-c305) of the S(-)-Limonene oxide. Contributions to the PED lower than 5% have been omitted. Also, the definition of the internal coordinates used in this work is done.

Definition of the internal coordinates following reference [21]:

Bond stretchings: sij (bond between atoms “i” and “j”)

Torsions and twistings: tccal (carbonyl torsion), tccm1 and tccm2 (methyl torsions); tcci (isopropyl torsion); tccv (vinyl torsion), tccH16 (epoxy ring deformation-torsion).

Six-ring: td (trigonal deformation); adi(i = 1 and 2, asymmetric deformations); p (puckering); ati(i = 1 and 2, asymmetric torsions).

Methyl of the isopropenyl group: sdmi (symmetric deformation); admi1 and admi2 (asymmetric deformations); rmi1 and rmi2 (rockings).

Methylene sp<sup>2</sup> of the vinyl group: sdvi (i = 1 and 2, symmetric deformations); rvi (i = 1 and 2, rockings); wvi (i = 1 and 2, waggings).

Methine sp<sup>2</sup> of the C=C bond in the ring: rch1 (CH rocking); wch1 (CH wagging).

Methylene sp<sup>2</sup> of the C=C bond in the ring: rch2 (rocking); wch2 (wagging).

Epoxy ring: n1, n2 and n3 (epoxy ring deformations).

Methylenes sp<sup>3</sup> of the CH<sub>2</sub> in the ring: tjmeti (i = 1, 2 and 3, CH<sub>2</sub> scissoring); rmeti (i = 1, 2 and 3, CH<sub>2</sub> rocking); wmeti (i = 1, 2 and 3, CH<sub>2</sub> wagging); twmeti (i = 1, 2 and 3, CH<sub>2</sub> twisting).

Methine sp<sup>3</sup> of the chiral carbon: rchqi (i = 1 and 2, CH rocking); dfixcz and dfycz (XCZ and YCZ deformations).



## Supplementary Material (ESI) for PCCP

This journal is © the Owner Societies 2009

Molecule 1 \*oxido de limoneno eq-t110 pred\*

Freq. Main % contributions to the P.E.D. in sym. coordinates

|       |        |        |        |        |        |        |        |                                |
|-------|--------|--------|--------|--------|--------|--------|--------|--------------------------------|
| 54.   | tcci   | ( 61), | dcq1   | ( 10), | tccm1  | ( 10), | at1    | ( 6)                           |
| 65.   | at1    | ( 55), | at2    | ( 23), | p      | ( 6)   |        |                                |
| 165.  | tccH16 | ( 26), | dcq1   | ( 14), | wv2    | ( 11), | dcq2   | ( 11), tccm2 ( 9), n2 ( 7)     |
| 177.  | tccm1  | ( 37), | tccH16 | ( 18), | tccm2  | ( 13), | n1     | ( 12), wv2 ( 6)                |
| 186.  | tccm2  | ( 34), | tccH16 | ( 22), | tccm1  | ( 20), | n1     | ( 11)                          |
| 208.  | at2    | ( 54), | dcq2   | ( 11), | dcq1   | ( 6)   |        |                                |
| 233.  | tccH16 | ( 48), | n1     | ( 15), | at2    | ( 7),  | p      | ( 6), tccm2 ( 6)               |
| 281.  | ad1    | ( 20), | tccH16 | ( 15), | p      | ( 15), | s47    | ( 7), sdv2 ( 6), rv2 ( 6)      |
| 316.  | n1     | ( 45), | n2     | ( 14), | tccH16 | ( 7),  | at1    | ( 7), p ( 6)                   |
| 318.  | n2     | ( 22), | n3     | ( 17), | p      | ( 11), | ad1    | ( 8), ad2 ( 7), sdv2 ( 7)      |
| 387.  | tccH16 | ( 57), | n2     | ( 11), | p      | ( 10), | at1    | ( 7)                           |
| 440.  | n1     | ( 44), | p      | ( 15), | n3     | ( 11), | rv2    | ( 8)                           |
| 470.  | rv2    | ( 30), | ad1    | ( 21), | n1     | ( 12), | tccH16 | ( 9), ad2 ( 5)                 |
| 506.  | sdv2   | ( 20), | tccH16 | ( 18), | n1     | ( 16), | dcq2   | ( 11)                          |
| 528.  | tccH16 | ( 26), | wv2    | ( 25), | ad2    | ( 13), | dcq1   | ( 9), rmi2 ( 7), n3 ( 5)       |
| 560.  | tccH16 | ( 48), | ad2    | ( 11), | wv2    | ( 7)   |        |                                |
| 610.  | td     | ( 25), | s110   | ( 10), | s47    | ( 9),  | ad2    | ( 7), s12 ( 6), n4 ( 6)        |
| 671.  | rO1    | ( 19), | rO2    | ( 18), | tccH16 | ( 13), | s61    | ( 13), n4 ( 7)                 |
| 707.  | tccv   | ( 78), | s34    | ( 6)   |        |        |        |                                |
| 752.  | tccH16 | ( 31), | n4     | ( 13), | rO1    | ( 11), | s12    | ( 6)                           |
| 794.  | tccH16 | ( 24), | rmet3  | ( 10), | rmet2  | ( 9),  | n3     | ( 7), rO1 ( 7), s79 ( 6)       |
| 843.  | rO2    | ( 16), | rO1    | ( 15), | rmet1  | ( 15), | n3     | ( 12), tccH16 ( 7), s12 ( 6)   |
| 881.  | s79    | ( 28), | rO2    | ( 17)  |        |        |        |                                |
| 888.  | n3     | ( 21), | rmet2  | ( 14), | tccH16 | ( 13), | s34    | ( 10), rmet1 ( 8), s45 ( 5)    |
| 905.  | wv     | ( 77)  |        |        |        |        |        |                                |
| 912.  | tccH16 | ( 23), | n3     | ( 21), | rma2   | ( 10), | wv     | ( 6), s61 ( 6), s56 ( 6)       |
| 971.  | tccH16 | ( 15), | rma1   | ( 13), | rO2    | ( 9),  | rmet3  | ( 9), n4 ( 8)                  |
| 976.  | rv     | ( 30), | tccH16 | ( 22), | n3     | ( 13), | rmi1   | ( 11)                          |
| 997.  | n3     | ( 41), | tccH16 | ( 41)  |        |        |        |                                |
| 1011. | rmi1   | ( 22), | s23    | ( 13), | s56    | ( 10), | s47    | ( 9), td ( 9)                  |
| 1027. | tccH16 | ( 31), | n3     | ( 12), | rmi1   | ( 9),  | rma1   | ( 7), twmet3 ( 5)              |
| 1036. | n3     | ( 45), | tccH16 | ( 44)  |        |        |        |                                |
| 1041. | rmi2   | ( 39), | tccH16 | ( 22), | n3     | ( 22)  |        |                                |
| 1082. | rmet2  | ( 13), | p      | ( 12), | twmet1 | ( 8),  | rmet1  | ( 7), td ( 6), rmet3 ( 5)      |
| 1093. | tccH16 | ( 57), | n3     | ( 28)  |        |        |        |                                |
| 1115. | s45    | ( 18), | s34    | ( 15), | s23    | ( 12), | tccH16 | ( 11)                          |
| 1181. | tccH16 | ( 40), | n3     | ( 23), | twmet2 | ( 9)   |        |                                |
| 1212. | tccH16 | ( 44), | n4     | ( 22), | n3     | ( 9),  | twmet3 | ( 9)                           |
| 1216. | tccH16 | ( 29), | n4     | ( 21), | n3     | ( 14), | twmet1 | ( 8), s110 ( 6)                |
| 1254. | n3     | ( 29), | tccH16 | ( 26), | twmet2 | ( 12), | twmet1 | ( 6), wmet1 ( 6)               |
| 1281. | s47    | ( 24), | rv     | ( 18), | s79    | ( 16), | rv2    | ( 14)                          |
| 1288. | rchq2  | ( 38), | rchq1  | ( 11), | twmet1 | ( 11), | twmet3 | ( 8), wmet1 ( 6)               |
| 1307. | n4     | ( 34), | n3     | ( 10), | wmet2  | ( 10), | wmet1  | ( 10), twmet3 ( 7), rchq1 ( 7) |
| 1320. | n4     | ( 61), | n3     | ( 30)  |        |        |        |                                |
| 1345. | rchq1  | ( 26), | n4     | ( 15), | wmet1  | ( 14), | n3     | ( 13), s34 ( 8), twmet2 ( 5)   |
| 1360. | wmet3  | ( 21), | s61    | ( 10), | s56    | ( 9),  | wmet2  | ( 9), wmet1 ( 8), twmet2 ( 7)  |
| 1364. | wmet2  | ( 21), | wmet3  | ( 18), | n3     | ( 16), | s61    | ( 9)                           |
| 1381. | sdmi   | ( 47), | sdma   | ( 26), | n4     | ( 6),  | s79    | ( 5)                           |
| 1382. | sdma   | ( 43), | sdmi   | ( 19), | n4     | ( 13), | s110   | ( 6)                           |
| 1411. | sdv    | ( 42), | admi2  | ( 16), | rchq2  | ( 8),  | admi1  | ( 8)                           |
| 1428. | n4     | ( 36), | n3     | ( 34), | tjmet1 | ( 7),  | tjmet3 | ( 6)                           |
| 1431. | tjmet1 | ( 31), | n3     | ( 21), | n4     | ( 15), | adma1  | ( 10), adma2 ( 10)             |
| 1433. | tjmet3 | ( 29), | admi1  | ( 13), | n3     | ( 11), | adma1  | ( 11), n4 ( 9), adma2 ( 6)     |
| 1436. | admi1  | ( 42), | tjmet3 | ( 20), | admi2  | ( 19), | rmi2   | ( 5)                           |
| 1445. | adma2  | ( 35), | n3     | ( 22), | adma1  | ( 17), | n4     | ( 17)                          |
| 1451. | admi2  | ( 34), | admi1  | ( 22), | sdv    | ( 15), | tjmet2 | ( 11), rmi1 ( 6), tjmet1 ( 5)  |
| 1452. | tjmet2 | ( 57), | admi2  | ( 15), | tjmet3 | ( 9),  | sdv    | ( 6), tjmet1 ( 5)              |
| 1474. | n4     | ( 38), | n3     | ( 38), | s12    | ( 7)   |        |                                |
| 1645. | s78    | ( 65), | sdv    | ( 15), | sdv2   | ( 5)   |        |                                |
| 2888. | s419   | ( 86), | s623   | ( 6)   |        |        |        |                                |
| 2892. | s623   | ( 52), | s622   | ( 34), | s419   | ( 9)   |        |                                |
| 2905. | s915   | ( 39), | s914   | ( 37), | s913   | ( 17)  |        |                                |
| 2909. | s1025  | ( 42), | s1024  | ( 36), | s1026  | ( 20)  |        |                                |
| 2912. | s317   | ( 55), | s318   | ( 33)  |        |        |        |                                |
| 2920. | s521   | ( 40), | s520   | ( 31), | s623   | ( 14), | s622   | ( 9)                           |
| 2930. | s622   | ( 52), | s623   | ( 24), | s521   | ( 21)  |        |                                |
| 2951. | s318   | ( 46), | s317   | ( 30), | s216   | ( 11), | s915   | ( 6)                           |
| 2957. | s914   | ( 44), | s915   | ( 42), | s317   | ( 5)   |        |                                |
| 2966. | s216   | ( 39), | s520   | ( 34), | s521   | ( 17)  |        |                                |
| 2968. | s216   | ( 44), | s520   | ( 26), | s521   | ( 14), | s318   | ( 8)                           |
| 2973. | s1025  | ( 49), | s1024  | ( 46)  |        |        |        |                                |
| 2994. | s913   | ( 80), | s914   | ( 10), | s915   | ( 8)   |        |                                |
| 2999. | s1026  | ( 78), | s1024  | ( 15), | s1025  | ( 6)   |        |                                |
| 3005. | s812   | ( 51), | s811   | ( 47)  |        |        |        |                                |
| 3092. | s811   | ( 51), | s812   | ( 48)  |        |        |        |                                |



## Supplementary Material (ESI) for PCCP

This journal is © the Owner Societies 2009

Molecule 1 \*oxido de limoneno eq-cl10 pred\*

Freq. Main % contributions to the P.E.D. in sym. coordinates

|       |        |        |        |        |        |        |        |        |        |        |        |       |
|-------|--------|--------|--------|--------|--------|--------|--------|--------|--------|--------|--------|-------|
| 44.   | tcci   | ( 64), | tccm1  | ( 18), | dcq1   | ( 6),  | tccv   | ( 5)   |        |        |        |       |
| 78.   | at1    | ( 55), | at2    | ( 18), | tccH16 | ( 10), | n1     | ( 5)   |        |        |        |       |
| 151.  | at2    | ( 48), | dcq1   | ( 14), | p      | ( 9),  | wv2    | ( 6),  | tccH16 | ( 6)   |        |       |
| 176.  | dcq2   | ( 23), | tccm1  | ( 21), | at2    | ( 15), | wv2    | ( 15), | p      | ( 6)   |        |       |
| 183.  | tccm1  | ( 57), | tccH16 | ( 11), | dcq2   | ( 6)   |        |        |        |        |        |       |
| 204.  | tccH16 | ( 35), | n1     | ( 26), | tccm2  | ( 24)  |        |        |        |        |        |       |
| 241.  | tccH16 | ( 45), | tccm2  | ( 14), | n1     | ( 10), | at2    | ( 7),  | p      | ( 6)   |        |       |
| 263.  | n1     | ( 18), | sdv2   | ( 18), | ad1    | ( 12), | tccH16 | ( 7),  | at1    | ( 6),  | s47    | ( 6)  |
| 321.  | n2     | ( 43), | n1     | ( 21), | ad2    | ( 9),  | n3     | ( 6)   |        |        |        |       |
| 334.  | p      | ( 19), | ad1    | ( 14), | rv2    | ( 10), | sdv2   | ( 8),  | n3     | ( 8),  | n1     | ( 6)  |
| 401.  | tccH16 | ( 70), | p      | ( 9),  | at1    | ( 8)   |        |        |        |        |        |       |
| 411.  | n1     | ( 50), | ad2    | ( 10), | p      | ( 6),  | at1    | ( 6),  | n3     | ( 6)   |        |       |
| 468.  | rv2    | ( 43), | ad1    | ( 22), | ad2    | ( 8),  | rv     | ( 5)   |        |        |        |       |
| 501.  | sdv2   | ( 20), | n1     | ( 14), | tccH16 | ( 14), | dcq2   | ( 10), | dcq1   | ( 6),  | p      | ( 6)  |
| 532.  | wv2    | ( 35), | dcq1   | ( 12), | tccH16 | ( 11), | rmi2   | ( 10), | ad2    | ( 7)   |        |       |
| 558.  | tccH16 | ( 24), | ad2    | ( 10), | n1     | ( 8),  | dcq2   | ( 7),  | wv2    | ( 7),  | ad1    | ( 6)  |
| 631.  | td     | ( 24), | s47    | ( 11), | s110   | ( 10), | ad2    | ( 9),  | s34    | ( 7),  | s12    | ( 7)  |
| 677.  | rO2    | ( 20), | rO1    | ( 14), | s61    | ( 11), | tccH16 | ( 8),  | s12    | ( 6),  | p      | ( 6)  |
| 709.  | tccv   | ( 78), | s34    | ( 6)   |        |        |        |        |        |        |        |       |
| 759.  | tccH16 | ( 41), | rO1    | ( 16), | n4     | ( 13)  |        |        |        |        |        |       |
| 787.  | rmet3  | ( 20), | rmet2  | ( 16), | tccH16 | ( 14), | s79    | ( 7),  | rmet1  | ( 6),  | n3     | ( 6)  |
| 846.  | rO2    | ( 22), | rmet1  | ( 13), | rmet2  | ( 10), | rO1    | ( 7),  | s12    | ( 6),  | n4     | ( 6)  |
| 872.  | s79    | ( 30), | s45    | ( 9),  | n3     | ( 9),  | s34    | ( 7),  | tccH16 | ( 6)   |        |       |
| 900.  | n3     | ( 39), | tccH16 | ( 25)  |        |        |        |        |        |        |        |       |
| 910.  | wv     | ( 91)  |        |        |        |        |        |        |        |        |        |       |
| 921.  | rmet1  | ( 13), | rma1   | ( 13), | s23    | ( 9),  | rmet3  | ( 7),  | rma2   | ( 7),  | twmet2 | ( 6)  |
| 949.  | n4     | ( 14), | rO2    | ( 14), | td     | ( 7),  | n3     | ( 7),  | rmet2  | ( 6),  | s23    | ( 6)  |
| 977.  | rv     | ( 41), | rmi1   | ( 15), | tccH16 | ( 12), | n3     | ( 9)   |        |        |        |       |
| 1006. | tccH16 | ( 38), | n3     | ( 21), | s56    | ( 9),  | rmi1   | ( 6)   |        |        |        |       |
| 1011. | tccH16 | ( 32), | n3     | ( 30), | rmi1   | ( 8),  | rma1   | ( 7)   |        |        |        |       |
| 1036. | tccH16 | ( 40), | n3     | ( 14), | rma2   | ( 12), | rmi2   | ( 5)   |        |        |        |       |
| 1041. | rmi2   | ( 41), | s56    | ( 9),  | rmi1   | ( 6)   |        |        |        |        |        |       |
| 1045. | n3     | ( 51), | tccH16 | ( 39)  |        |        |        |        |        |        |        |       |
| 1058. | tccH16 | ( 43), | n3     | ( 14), | n4     | ( 7)   |        |        |        |        |        |       |
| 1098. | tccH16 | ( 33), | n3     | ( 21), | s45    | ( 12), | s34    | ( 9)   |        |        |        |       |
| 1117. | tccH16 | ( 54), | n3     | ( 15), | n4     | ( 8)   |        |        |        |        |        |       |
| 1181. | n3     | ( 20), | twmet1 | ( 15), | twmet2 | ( 13), | tccH16 | ( 12), | rchq1  | ( 9),  | n4     | ( 6)  |
| 1196. | tccH16 | ( 49), | n3     | ( 18), | n4     | ( 16), | twmet3 | ( 5)   |        |        |        |       |
| 1232. | tccH16 | ( 43), | n3     | ( 25), | n4     | ( 12)  |        |        |        |        |        |       |
| 1255. | twmet2 | ( 25), | wmet2  | ( 12), | wmet1  | ( 12), | twmet1 | ( 9),  | s56    | ( 6)   |        |       |
| 1276. | n4     | ( 22), | s47    | ( 9),  | tccH16 | ( 9),  | wmet1  | ( 7),  | twmet1 | ( 6),  | s79    | ( 6)  |
| 1284. | rchq2  | ( 18), | rv     | ( 12), | s47    | ( 12), | rchq1  | ( 11), | rv2    | ( 9),  | s79    | ( 9)  |
| 1304. | n4     | ( 42), | n3     | ( 25), | twmet3 | ( 8),  | wmet2  | ( 6)   |        |        |        |       |
| 1314. | n4     | ( 59), | n3     | ( 30)  |        |        |        |        |        |        |        |       |
| 1350. | rchq1  | ( 22), | n4     | ( 15), | n3     | ( 10), | twmet2 | ( 9),  | rchq2  | ( 8),  | wmet1  | ( 7)  |
| 1355. | wmet3  | ( 28), | n4     | ( 16), | wmet1  | ( 10), | s61    | ( 9),  | tccH16 | ( 7)   |        |       |
| 1366. | wmet2  | ( 27), | wmet3  | ( 9),  | sdmi   | ( 8),  | sdv    | ( 7),  | rchq2  | ( 7),  | n3     | ( 7)  |
| 1380. | sdmi   | ( 38), | sdma   | ( 35), | s110   | ( 5)   |        |        |        |        |        |       |
| 1382. | sdma   | ( 35), | sdmi   | ( 24), | n4     | ( 13)  |        |        |        |        |        |       |
| 1412. | sdv    | ( 42), | admi2  | ( 17), | rchq2  | ( 9),  | adm1   | ( 6)   |        |        |        |       |
| 1428. | n4     | ( 36), | n3     | ( 33), | tjmet3 | ( 12), | adma2  | ( 9)   |        |        |        |       |
| 1433. | tjmet1 | ( 37), | adma2  | ( 20), | tjmet2 | ( 13), | adm1   | ( 10)  |        |        |        |       |
| 1436. | tjmet3 | ( 23), | tjmet1 | ( 22), | n3     | ( 21), | n4     | ( 20), | adma2  | ( 9)   |        |       |
| 1437. | adm1   | ( 55), | admi2  | ( 18), | rmi2   | ( 6),  | tjmet1 | ( 6),  | tjmet3 | ( 6),  | adma2  | ( 6)  |
| 1446. | adma1  | ( 58), | n3     | ( 18), | n4     | ( 14)  |        |        |        |        |        |       |
| 1451. | admi2  | ( 51), | sdv    | ( 21), | adm1   | ( 14), | rmi1   | ( 7)   |        |        |        |       |
| 1456. | tjmet2 | ( 76), | tjmet1 | ( 9),  | tjmet3 | ( 7)   |        |        |        |        |        |       |
| 1473. | n4     | ( 41), | n3     | ( 39), | s12    | ( 7)   |        |        |        |        |        |       |
| 1645. | s78    | ( 65), | sdv    | ( 15), | sdv2   | ( 5)   |        |        |        |        |        |       |
| 2895. | s520   | ( 70), | s521   | ( 15)  |        |        |        |        |        |        |        |       |
| 2898. | s317   | ( 54), | s318   | ( 24), | s914   | ( 9),  | s915   | ( 6)   |        |        |        |       |
| 2904. | s623   | ( 32), | s622   | ( 18), | s1025  | ( 16), | s1026  | ( 14), | s1024  | ( 7)   |        |       |
| 2905. | s914   | ( 27), | s915   | ( 27), | s913   | ( 12), | s520   | ( 7),  | s317   | ( 7),  | s318   | ( 6)  |
| 2909. | s623   | ( 32), | s1025  | ( 23), | s1026  | ( 19), | s622   | ( 11), | s1024  | ( 11)  |        |       |
| 2926. | s419   | ( 69), | s318   | ( 18), | s521   | ( 7)   |        |        |        |        |        |       |
| 2940. | s521   | ( 34), | s318   | ( 30), | s317   | ( 17), | s622   | ( 9)   |        |        |        |       |
| 2944. | s622   | ( 37), | s318   | ( 14), | s419   | ( 13), | s623   | ( 12), | s521   | ( 10), | s317   | ( 10) |
| 2953. | s521   | ( 25), | s622   | ( 17), | s623   | ( 17), | s520   | ( 13), | s419   | ( 9),  | s914   | ( 6)  |
| 2954. | s915   | ( 44), | s914   | ( 42)  |        |        |        |        |        |        |        |       |
| 2956. | s216   | ( 95)  |        |        |        |        |        |        |        |        |        |       |
| 2970. | s1025  | ( 50), | s1026  | ( 47)  |        |        |        |        |        |        |        |       |
| 2992. | s913   | ( 81), | s914   | ( 9),  | s915   | ( 9)   |        |        |        |        |        |       |
| 2998. | s1024  | ( 78), | s1026  | ( 15), | s1025  | ( 6)   |        |        |        |        |        |       |
| 3006. | s811   | ( 50), | s812   | ( 48)  |        |        |        |        |        |        |        |       |
| 3093. | s812   | ( 51), | s811   | ( 48)  |        |        |        |        |        |        |        |       |



## Supplementary Material (ESI) for PCCP

This journal is © the Owner Societies 2009

Molecule 1 \*oxido de limoneno eq-c305 pred\*

Freq. Main % contributions to the P.E.D. in sym. coordinates

|       |        |        |        |        |        |        |        |        |        |        |       |      |
|-------|--------|--------|--------|--------|--------|--------|--------|--------|--------|--------|-------|------|
| 33.   | tcci   | ( 49), | tccm1  | ( 17), | dcq2   | ( 9),  | wv2    | ( 5)   |        |        |       |      |
| 77.   | at1    | ( 49), | at2    | ( 9),  | tccH16 | ( 9),  | dcq2   | ( 7)   |        |        |       |      |
| 144.  | at2    | ( 47), | dcq1   | ( 11), | p      | ( 11), | tccm1  | ( 10), | tccH16 | ( 6)   |       |      |
| 169.  | tccm1  | ( 26), | at2    | ( 17), | dcq2   | ( 17), | tccv   | ( 7),  | at1    | ( 6),  | tccm2 | ( 6) |
| 186.  | tccm1  | ( 40), | wv2    | ( 16), | tccm2  | ( 12), | dcq2   | ( 11), | dcq1   | ( 6)   |       |      |
| 208.  | tccH16 | ( 36), | n1     | ( 27), | tccm2  | ( 21)  |        |        |        |        |       |      |
| 242.  | tccH16 | ( 47), | n1     | ( 14), | tccm2  | ( 10), | at2    | ( 7)   |        |        |       |      |
| 288.  | rv2    | ( 15), | ad1    | ( 13), | dcq1   | ( 13), | at1    | ( 12), | n1     | ( 8),  | s47   | ( 8) |
| 321.  | n2     | ( 31), | n1     | ( 27), | ad2    | ( 10), | n3     | ( 9),  | tccH16 | ( 6)   |       |      |
| 332.  | p      | ( 26), | sdv2   | ( 19), | n2     | ( 13), | ad1    | ( 11), | at1    | ( 6),  | wv2   | ( 5) |
| 396.  | tccH16 | ( 70)  |        |        |        |        |        |        |        |        |       |      |
| 409.  | n1     | ( 46), | p      | ( 13), | at1    | ( 9),  | ad2    | ( 8),  | n3     | ( 7)   |       |      |
| 451.  | ad1    | ( 25), | sdv2   | ( 20), | rv2    | ( 6),  | dcq1   | ( 5)   |        |        |       |      |
| 499.  | rv2    | ( 33), | dcq1   | ( 16), | wv2    | ( 15), | rv     | ( 5)   |        |        |       |      |
| 523.  | tccH16 | ( 24), | n1     | ( 15), | wv2    | ( 13), | td     | ( 5),  | rv2    | ( 5)   |       |      |
| 565.  | tccH16 | ( 18), | wv2    | ( 11), | ad2    | ( 10), | dcq2   | ( 9),  | ad1    | ( 6),  | n1    | ( 6) |
| 631.  | td     | ( 25), | s47    | ( 10), | s110   | ( 10), | ad2    | ( 9),  | s34    | ( 7),  | s12   | ( 7) |
| 675.  | tccv   | ( 20), | rO2    | ( 13), | rO1    | ( 11), | s61    | ( 8),  | s45    | ( 7)   |       |      |
| 682.  | tccv   | ( 43), | rO2    | ( 10), | tccH16 | ( 5)   |        |        |        |        |       |      |
| 759.  | tccH16 | ( 42), | rO1    | ( 16), | n4     | ( 13), | n1     | ( 5)   |        |        |       |      |
| 791.  | rmet3  | ( 20), | rmet2  | ( 17), | tccH16 | ( 12), | rmet1  | ( 10), | n3     | ( 6),  | s45   | ( 5) |
| 850.  | rO2    | ( 25), | rmet2  | ( 9),  | rmet1  | ( 7),  | rO1    | ( 6),  | s12    | ( 6),  | n4    | ( 6) |
| 885.  | s79    | ( 22), | tccH16 | ( 17), | n3     | ( 14), | s45    | ( 8),  | s34    | ( 7),  | rmet1 | ( 6) |
| 904.  | wv     | ( 34), | n3     | ( 24), | tccH16 | ( 11)  |        |        |        |        |       |      |
| 905.  | n3     | ( 28), | wv     | ( 23), | tccH16 | ( 15)  |        |        |        |        |       |      |
| 920.  | rmet1  | ( 14), | rma1   | ( 14), | s23    | ( 10), | rma2   | ( 6),  | s56    | ( 6),  | rmet3 | ( 6) |
| 947.  | rO2    | ( 11), | n4     | ( 11), | s79    | ( 8),  | rmet2  | ( 8),  | s45    | ( 7),  | td    | ( 6) |
| 983.  | s47    | ( 16), | rmi1   | ( 15), | s23    | ( 10), | td     | ( 8),  | rv     | ( 7)   |       |      |
| 996.  | tccH16 | ( 25), | n3     | ( 20), | rmi1   | ( 14), | rv     | ( 12), | rma1   | ( 8)   |       |      |
| 1015. | tccH16 | ( 49), | n3     | ( 27), | s56    | ( 7)   |        |        |        |        |       |      |
| 1033. | tccH16 | ( 28), | n3     | ( 17), | rma2   | ( 12), | rmi2   | ( 7)   |        |        |       |      |
| 1045. | n3     | ( 52), | tccH16 | ( 37)  |        |        |        |        |        |        |       |      |
| 1052. | tccH16 | ( 45), | n3     | ( 21), | rmi2   | ( 6)   |        |        |        |        |       |      |
| 1069. | rmi2   | ( 20), | n4     | ( 9),  | p      | ( 6)   |        |        |        |        |       |      |
| 1102. | tccH16 | ( 49), | n3     | ( 21), | s45    | ( 6)   |        |        |        |        |       |      |
| 1120. | tccH16 | ( 48), | n3     | ( 12), | n4     | ( 8)   |        |        |        |        |       |      |
| 1181. | tccH16 | ( 26), | n3     | ( 25), | twmet2 | ( 13), | twmet1 | ( 9),  | rchq1  | ( 5)   |       |      |
| 1197. | tccH16 | ( 42), | n4     | ( 21), | n3     | ( 12), | twmet3 | ( 6)   |        |        |       |      |
| 1213. | tccH16 | ( 43), | n3     | ( 25), | n4     | ( 9)   |        |        |        |        |       |      |
| 1246. | tccH16 | ( 35), | n3     | ( 17), | n4     | ( 14), | twmet3 | ( 8),  | wmet2  | ( 5)   |       |      |
| 1266. | twmet1 | ( 26), | twmet2 | ( 17), | tccH16 | ( 9),  | rchq2  | ( 6)   |        |        |       |      |
| 1298. | n4     | ( 46), | n3     | ( 25), | rchq2  | ( 6)   |        |        |        |        |       |      |
| 1300. | wmet1  | ( 23), | twmet3 | ( 14), | rchq1  | ( 13), | wmet2  | ( 10), | twmet1 | ( 8),  | s23   | ( 5) |
| 1319. | n4     | ( 60), | n3     | ( 29)  |        |        |        |        |        |        |       |      |
| 1343. | wmet2  | ( 25), | rchq1  | ( 15), | rchq2  | ( 12), | twmet2 | ( 12), | s56    | ( 7),  | s45   | ( 7) |
| 1360. | wmet3  | ( 35), | s61    | ( 14), | wmet2  | ( 11), | n3     | ( 6),  | tccH16 | ( 6)   |       |      |
| 1377. | sdmi   | ( 31), | sdma   | ( 30), | wmet1  | ( 8),  | rchq1  | ( 7)   |        |        |       |      |
| 1381. | sdmi   | ( 40), | sdma   | ( 32), | n4     | ( 7)   |        |        |        |        |       |      |
| 1387. | sdma   | ( 13), | wmet1  | ( 13), | rchq1  | ( 11), | n4     | ( 11), | s47    | ( 8),  | s34   | ( 7) |
| 1405. | sdv    | ( 59), | admi1  | ( 12), | s78    | ( 7)   |        |        |        |        |       |      |
| 1428. | n4     | ( 32), | n3     | ( 28), | tjmet3 | ( 22)  |        |        |        |        |       |      |
| 1433. | adma2  | ( 27), | n3     | ( 22), | n4     | ( 19), | admi2  | ( 10), | tjmet2 | ( 7)   |       |      |
| 1435. | tjmet1 | ( 49), | admi2  | ( 32), | n4     | ( 7)   |        |        |        |        |       |      |
| 1436. | tjmet3 | ( 22), | n3     | ( 18), | n4     | ( 15), | tjmet1 | ( 11), | admi2  | ( 11), | adma2 | ( 8) |
| 1445. | admi1  | ( 30), | adma1  | ( 25), | n3     | ( 13), | n4     | ( 11)  |        |        |       |      |
| 1449. | adma1  | ( 44), | admi1  | ( 20), | n3     | ( 8),  | sdv    | ( 7),  | n4     | ( 6)   |       |      |
| 1456. | tjmet2 | ( 67), | tjmet1 | ( 12), | admi2  | ( 6)   |        |        |        |        |       |      |
| 1475. | n4     | ( 42), | n3     | ( 39), | s12    | ( 7)   |        |        |        |        |       |      |
| 1651. | s78    | ( 64), | sdv    | ( 16)  |        |        |        |        |        |        |       |      |
| 2884. | s419   | ( 43), | s915   | ( 24), | s914   | ( 11), | s913   | ( 10), | s520   | ( 9)   |       |      |
| 2898. | s520   | ( 50), | s317   | ( 19), | s318   | ( 9),  | s915   | ( 6),  | s521   | ( 5)   |       |      |
| 2902. | s317   | ( 38), | s318   | ( 18), | s914   | ( 11), | s520   | ( 9),  | s915   | ( 8),  | s419  | ( 7) |
| 2903. | s623   | ( 43), | s622   | ( 22), | s1025  | ( 11), | s1026  | ( 10), | s1024  | ( 5)   |       |      |
| 2907. | s419   | ( 28), | s1025  | ( 15), | s1026  | ( 13), | s520   | ( 11), | s1024  | ( 8),  | s521  | ( 7) |
| 2909. | s623   | ( 22), | s1025  | ( 16), | s419   | ( 16), | s1026  | ( 13), | s1024  | ( 7),  | s914  | ( 7) |
| 2942. | s318   | ( 61), | s317   | ( 35)  |        |        |        |        |        |        |       |      |
| 2944. | s622   | ( 58), | s521   | ( 18), | s623   | ( 18)  |        |        |        |        |       |      |
| 2953. | s914   | ( 46), | s915   | ( 46)  |        |        |        |        |        |        |       |      |
| 2956. | s521   | ( 62), | s520   | ( 16), | s623   | ( 10), | s622   | ( 8)   |        |        |       |      |
| 2958. | s216   | ( 94)  |        |        |        |        |        |        |        |        |       |      |
| 2971. | s1025  | ( 49), | s1026  | ( 48)  |        |        |        |        |        |        |       |      |
| 2992. | s913   | ( 79), | s914   | ( 12), | s915   | ( 6)   |        |        |        |        |       |      |
| 2999. | s1024  | ( 78), | s1026  | ( 15), | s1025  | ( 6)   |        |        |        |        |       |      |
| 3019. | s811   | ( 63), | s812   | ( 36)  |        |        |        |        |        |        |       |      |
| 3104. | s812   | ( 63), | s811   | ( 36)  |        |        |        |        |        |        |       |      |
